# Supplementary material for: Harnessing Novel Diversity From Landraces to Improve an Elite Barley Variety
Source: Front Plant Sci. 2019 Apr 11;10:434. doi: 10.3389/fpls.2019.00434 (PMC6470277; doi:10.3389/fpls.2019.00434)
Supplement: Supplementary file 3 [file Table_2.XLSX]

## Sheet: Legend
Supplementary Material
Harnessing novel diversity from landraces to improve an elite barley variety
Arantxa Monteagudo, Ana M. Casas, Carlos P. Cantalapiedra, Bruno Contreras-Moreira, M Pilar Gracia, Ernesto Igartua*
* Correspondence: Corresponding Author: igartua@eead.csic.es
Supplementary File 2
Supplementary Data 2. Full list of gene IDs and other information from a Barleymap output, for genes comprised in the confidence intervals of each QTL

## Sheet: HORVUS_within_interval_data
QTL.ID	Marker	Description	chr	start	end	strand	other_alignments	Gene_class	InterPro	GeneOntologies
QFD.73xC.1.1	HORVU1Hr1G008580	undescribed protein	1H	18791873	18793437	-	No	HC_u	-	-
QFD.73xC.1.1	HORVU1Hr1G008590	undescribed protein	1H	18791873	18795643	+	No	LC_u	-	-
QFD.73xC.1.1	HORVU1Hr1G008600	undescribed protein	1H	18797406	18800901	-	No	LC_u	-	-
QFD.73xC.1.1	HORVU1Hr1G008610	undescribed protein	1H	18800249	18800901	+	No	LC_u	-	-
QFD.73xC.1.1	HORVU1Hr1G008620	Coiled-coil domain-containing protein 130	1H	18802466	18807666	+	No	HC_G	IPR007590	-
QFD.73xC.1.1	HORVU1Hr1G008630	cDNA clone:J013022N21, full insert sequence	1H	18821209	18821791	-	No	LC_U	-	-
QFD.73xC.1.1	HORVU1Hr1G008640	undescribed protein	1H	18833375	18840807	-	No	LC_u	-	-
QFD.73xC.1.1	HORVU1Hr1G008650	AT-hook motif nuclear-localized protein 20	1H	18846019	18848329	-	No	HC_G	IPR005175,IPR014476	-
QFD.73xC.1.1	HORVU1Hr1G008660	undescribed protein	1H	18900709	18901671	-	No	LC_u	-	-
QFD.73xC.1.1	HORVU1Hr1G008670	Lysosomal Pro-X carboxypeptidase	1H	18905892	18907170	-	No	HC_G	IPR008758	GO:0006508,GO:0008236
QFD.73xC.1.1	HORVU1Hr1G008680	unknown function	1H	18913478	18914276	-	No	LC_U	-	-
QFD.73xC.1.1	HORVU1Hr1G008690	Histone-lysine N-methyltransferase, H3 lysine-9 specific	1H	19120683	19123537	+	No	HC_G	IPR007728,IPR015947,IPR025794,IPR001214,IPR003105,IPR003606	GO:0016571,GO:0018024,GO:0034968,GO:0042393,GO:0005515,GO:0005634,GO:0008270
QFD.73xC.1.1	HORVU1Hr1G008700	undescribed protein	1H	19198822	19199561	-	No	LC_u	-	-
QFD.73xC.1.1	HORVU1Hr1G008710	undescribed protein	1H	19200886	19202046	-	No	LC_u	-	-
QFD.73xC.1.1	HORVU1Hr1G008720	undescribed protein	1H	19202305	19202934	+	No	LC_u	-	-
QFD.73xC.1.1	HORVU1Hr1G008730	Retrotransposon protein, putative, unclassified	1H	19214421	19214684	+	No	LC_TE	IPR021109	-
QFD.73xC.1.1	HORVU1Hr1G008740	undescribed protein	1H	19232154	19232845	+	No	LC_u	-	-
QFD.73xC.1.1	HORVU1Hr1G008750	Protein of unknown function (DUF1635)	1H	19267776	19272447	+	No	LC_U	IPR012862	-
QFD.73xC.1.1	HORVU1Hr1G008760	undescribed protein	1H	19270176	19272480	-	No	LC_u	-	-
QFD.73xC.1.1	HORVU1Hr1G008770	undescribed protein	1H	19273579	19274491	-	No	LC_u	-	-
QFD.73xC.1.1	HORVU1Hr1G008780	undescribed protein	1H	19276009	19276398	-	No	LC_u	-	-
QFD.73xC.1.1	HORVU1Hr1G008790	undescribed protein	1H	19276539	19277250	+	No	LC_u	-	-
QFD.73xC.1.1	HORVU1Hr1G008800	undescribed protein	1H	19289213	19289705	-	No	LC_u	-	-
QFD.73xC.1.1	HORVU1Hr1G008810	myb domain protein 59	1H	19369458	19370979	+	No	HC_G	IPR001005,IPR009057,IPR017930	GO:0003677
QFD.73xC.1.1	HORVU1Hr1G008820	undescribed protein	1H	19459303	19459716	-	No	LC_u	-	-
QFD.73xC.1.1	HORVU1Hr1G008830	unknown function	1H	19466424	19474740	+	No	HC_TE?	IPR001878,IPR006564,IPR007527	GO:0003676,GO:0008270
QFD.73xC.1.1	HORVU1Hr1G008840	unknown function	1H	19466428	19474456	-	No	HC_U	-	-
QFD.73xC.1.1	HORVU1Hr1G008850	undescribed protein	1H	19475147	19475731	-	No	LC_u	-	-
QFD.73xC.1.1	HORVU1Hr1G008860	undescribed protein	1H	19476106	19476823	+	No	LC_u	-	-
QFD.73xC.1.1	HORVU1Hr1G008870	undescribed protein	1H	19477982	19478527	-	No	LC_u	-	-
QFD.73xC.1.1	HORVU1Hr1G008880	unknown function	1H	19478755	19480346	-	No	LC_U	-	-
QFD.73xC.1.1	HORVU1Hr1G008890	HAT family dimerisation domain containing protein	1H	19490139	19492378	-	No	LC_TE	IPR008906,IPR012337	GO:0003676,GO:0046983
QFD.73xC.1.1	HORVU1Hr1G008900	Chromosome 3B, genomic scaffold, cultivar Chinese Spring	1H	19666235	19669353	+	No	HC_U	-	-
QFD.73xC.1.1	HORVU1Hr1G008910	Retrotransposon protein, putative, unclassified, expressed	1H	19673072	19689454	-	No	LC_TE	-	-
QFD.73xC.1.1	HORVU1Hr1G008920	unknown function	1H	19673245	19684296	+	No	LC_U	-	-
QFD.73xC.1.1	HORVU1Hr1G008930	Germin-like protein 9-3	1H	19946901	19947713	+	No	HC_G	IPR014710,IPR001929,IPR006045,IPR011051	GO:0030145,GO:0045735
QFD.73xC.1.1	HORVU1Hr1G008940	Chaperone protein DnaJ	1H	19951023	19959238	-	No	HC_G	IPR001623,IPR024593	-
QFD.73xC.1.1	HORVU1Hr1G008950	undescribed protein	1H	19990944	19992093	-	No	LC_u	-	-
QFD.73xC.1.1	HORVU1Hr1G008960	undescribed protein	1H	19992222	19993202	-	No	LC_u	-	-
QFD.73xC.1.1	HORVU1Hr1G008970	unknown function	1H	19993450	19994352	+	No	HC_U	-	-
QFD.73xC.1.1	HORVU1Hr1G008980	undescribed protein	1H	19995031	19995387	+	No	LC_u	-	-
QFD.73xC.1.1	HORVU1Hr1G008990	undescribed protein	1H	20008074	20009305	+	No	LC_u	-	-
QFD.73xC.1.1	HORVU1Hr1G009000	Protein CHUP1, chloroplastic	1H	20024059	20025076	-	No	HC_G	-	-
QFD.73xC.1.1	HORVU1Hr1G009010	unknown function	1H	20111975	20112185	-	No	HC_G	IPR016197	-
QFD.73xC.1.1	HORVU1Hr1G009020	Transposon Ty1-PL Gag-Pol polyprotein	1H	20140686	20141850	+	No	LC_TE	IPR001584,IPR012337,IPR025724	GO:0003676,GO:0015074
QFD.73xC.1.1	HORVU1Hr1G009030	unknown function	1H	20168302	20171564	-	No	HC_U	-	-
QFD.73xC.1.1	HORVU1Hr1G009040	MADS-box transcription factor 57	1H	20178900	20182749	+	No	HC_G	IPR002100	GO:0003677,GO:0046983
QFD.73xC.1.1	HORVU1Hr1G009050	Epoxide hydrolase 2	1H	20184000	20186570	+	No	HC_G	IPR000073,IPR000639,IPR029058	GO:0003824
QFD.73xC.1.1	HORVU1Hr1G009060	undescribed protein	1H	20190785	20191264	-	No	HC_u	-	-
QFD.73xC.1.1	HORVU1Hr1G009070	Leucine-rich repeat receptor-like protein kinase family protein	1H	20191510	20195380	-	No	HC_G	IPR032675,IPR001611,IPR003591,IPR013210	GO:0005515
QFD.73xC.1.1	HORVU1Hr1G009080	Leucine-rich repeat receptor-like protein kinase family protein	1H	20201702	20205369	+	No	HC_G	IPR011009,IPR013320,IPR017441,IPR032675,IPR000719,IPR001611,IPR003591	GO:0006468,GO:0004672,GO:0005515,GO:0005524
QFD.73xC.1.1	HORVU1Hr1G009090	soluble epoxide hydrolase	1H	20227196	20230962	+	No	HC_G	IPR000639,IPR029058	GO:0003824
QFD.73xC.1.1	HORVU1Hr1G009100	Potassium transporter family protein	1H	20234720	20239868	+	No	HC_G	IPR003855	GO:0015079,GO:0016020,GO:0071805
QFD.73xC.1.1	HORVU1Hr1G009110	Cytochrome P450 superfamily protein	1H	20287661	20291718	+	No	HC_G	IPR001128,IPR002401,IPR017972	GO:0055114,GO:0005506,GO:0016705,GO:0020037
QFD.73xC.1.1	HORVU1Hr1G009120	undescribed protein	1H	20297007	20298069	+	No	LC_u	-	-
QFD.73xC.1.1	HORVU1Hr1G009130	unknown function	1H	20335889	20337444	-	No	LC_U	-	-
QFD.73xC.1.1	HORVU1Hr1G009140	unknown function	1H	20345513	20346230	-	No	HC_U	-	-
QFD.73xC.1.1	HORVU1Hr1G009150	undescribed protein	1H	20349207	20349506	-	No	LC_u	-	-
QFD.73xC.1.1	HORVU1Hr1G009160	Ras-related protein Rab-1B	1H	20356706	20357325	-	No	HC_G	IPR001806,IPR027417	GO:0005525,GO:0007264
QFD.73xC.1.1	HORVU1Hr1G009170	receptor lectin kinase	1H	20360674	20361758	+	No	HC_G	IPR001220,IPR013320	GO:0030246
QFD.73xC.1.1	HORVU1Hr1G009180	receptor kinase 1	1H	20387532	20388218	-	No	HC_G	IPR000719,IPR002290,IPR011009	GO:0004672,GO:0005524,GO:0006468
QFD.73xC.1.1	HORVU1Hr1G009190	-	1H	20392147	20425867	-	No	-	-	-
QFD.73xC.1.1	HORVU1Hr1G009200	UDP-Glycosyltransferase superfamily protein	1H	20433053	20434750	-	No	HC_G	IPR002213	GO:0008152,GO:0016758
QFD.73xC.1.1	HORVU1Hr1G009210	unknown function	1H	20438171	20438389	-	No	LC_U	-	-
QFD.73xC.1.1	HORVU1Hr1G009220	Retrotransposon protein, putative, unclassified	1H	20460975	20461386	+	No	LC_TE	-	-
QFD.73xC.1.1	HORVU1Hr1G009230	UDP-Glycosyltransferase superfamily protein	1H	20462162	20463070	+	No	HC_G	IPR002213	GO:0008152,GO:0016758
QFD.73xC.1.1	HORVU1Hr1G009240	unknown function	1H	20469052	20491157	-	No	LC_U	-	-
QFD.73xC.1.1	HORVU1Hr1G009250	receptor kinase 2	1H	20470979	20491157	+	No	HC_G	IPR008271,IPR011009,IPR013320,IPR017441,IPR000719,IPR001220,IPR002290	GO:0030246,GO:0004672,GO:0005524,GO:0006468
QFD.73xC.1.1	HORVU1Hr1G009260	Transposon protein, putative, CACTA, En/Spm sub-class	1H	20471712	20475221	-	No	LC_TE	IPR025312	-
QFD.73xC.1.1	HORVU1Hr1G009270	undescribed protein	1H	20479901	20480549	+	No	LC_u	-	-
QFD.73xC.1.1	HORVU1Hr1G009280	Retrotransposon protein, putative, unclassified	1H	20530195	20530606	-	No	LC_TE	-	-
QFD.73xC.1.1	HORVU1Hr1G009290	undescribed protein	1H	20550326	20550544	-	No	HC_u	-	-
QFD.73xC.1.1	HORVU1Hr1G009300	NADH-quinone oxidoreductase subunit 12	1H	20551121	20553750	-	No	HC_G	IPR001750	-
QFD.73xC.1.1	HORVU1Hr1G009310	PEBP (phosphatidylethanolamine-binding protein) family protein	1H	20575796	20576944	-	No	HC_G	IPR005247,IPR008914	-
QFD.73xC.1.1	HORVU1Hr1G009320	Elongation factor 2	1H	20682891	20685963	-	No	HC_G	IPR009022,IPR014721,IPR020568,IPR000640,IPR004161,IPR009000	GO:0005525
QFD.73xC.1.1	HORVU1Hr1G009330	Chromosome 3B, genomic scaffold, cultivar Chinese Spring	1H	20692872	20696920	+	No	HC_U	-	-
QFD.73xC.1.1	HORVU1Hr1G009340	HAT dimerisation domain-containing protein, putative	1H	20721970	20722728	+	No	LC_TE	-	-
QFD.73xC.1.1	HORVU1Hr1G009350	NADH-ubiquinone oxidoreductase chain 6	1H	20754036	20754649	-	No	HC_G	-	-
QFD.73xC.1.1	HORVU1Hr1G009360	Cytochrome b	1H	20755424	20756616	-	No	HC_G	IPR005797,IPR016174,IPR027387	GO:0022904,GO:0009055,GO:0016020,GO:0016491
QFD.73xC.1.1	HORVU1Hr1G009370	undescribed protein	1H	20766473	20766691	-	No	HC_u	-	-
QFD.73xC.1.1	HORVU1Hr1G009380	NADH-ubiquinone oxidoreductase chain 5	1H	20767506	20767931	-	No	HC_G	IPR001750	-
QFD.73xC.1.1	HORVU1Hr1G009390	29 kDa ribonucleoprotein B, chloroplastic	1H	20780303	20780950	-	No	HC_G	IPR012677	GO:0000166
QFD.73xC.1.1	HORVU1Hr1G009400	undescribed protein	1H	20852173	20852663	-	No	LC_u	-	-
QFD.73xC.1.1	HORVU1Hr1G009410	undescribed protein	1H	20892007	20892544	-	No	LC_u	-	-
QFD.73xC.1.1	HORVU1Hr1G009420	undescribed protein	1H	20892788	20893435	-	No	LC_u	-	-
QFD.73xC.1.1	HORVU1Hr1G009430	Single-stranded nucleic acid-binding protein R3H	1H	20926765	20931349	-	No	HC_G	-	-
QFD.73xC.1.1	HORVU1Hr1G009440	Retrotransposon protein, putative, unclassified	1H	21016297	21016735	+	No	LC_TE	IPR000477	-
QFD.73xC.1.1	HORVU1Hr1G009450	undescribed protein	1H	21016739	21017171	-	No	LC_u	-	-
QFD.73xC.1.1	HORVU1Hr1G009460	Chromosome 3B, genomic scaffold, cultivar Chinese Spring	1H	21037590	21038802	-	No	HC_G	IPR002562,IPR012337	GO:0003676,GO:0006139,GO:0008408
QFD.73xC.1.1	HORVU1Hr1G009470	undescribed protein	1H	21048513	21049149	+	No	LC_u	-	-
QFD.73xC.1.1	HORVU1Hr1G009480	undescribed protein	1H	21049263	21049759	+	No	LC_u	-	-
QFD.73xC.1.1	HORVU1Hr1G009490	Bifunctional inhibitor/lipid-transfer protein/seed storage 2S albumin superfamily protein	1H	21102772	21103759	+	No	HC_G	IPR000528,IPR016140	GO:0006869,GO:0008289
QFD.73xC.1.1	HORVU1Hr1G009500	unknown function	1H	21168318	21168563	+	No	LC_TE	-	-
QFD.73xC.1.1	HORVU1Hr1G009510	unknown function	1H	21218161	21218679	-	No	LC_TE	-	-
QFD.73xC.1.1	HORVU1Hr1G009520	undescribed protein	1H	21225599	21226000	-	No	HC_u	-	-
QFD.73xC.1.1	HORVU1Hr1G009530	undescribed protein	1H	21230396	21230797	+	No	HC_u	-	-
QFD.73xC.1.1	HORVU1Hr1G009540	Transposon protein, putative, CACTA, En/Spm sub-class	1H	21315302	21319799	+	No	LC_TE	IPR029480,IPR004242,IPR025312,IPR025452	-
QFD.73xC.1.1	HORVU1Hr1G009550	Acid phosphatase 1	1H	21396415	21397526	-	No	HC_G	IPR005519,IPR023214	GO:0003993
QFD.73xC.1.1	HORVU1Hr1G009560	Disease resistance protein RGA2	1H	21403605	21410287	+	No	HC_G	IPR002182,IPR032675	GO:0043531
QFD.73xC.1.1	HORVU1Hr1G009570	Mediator of RNA polymerase II transcription subunit 10	1H	21412582	21414926	-	No	HC_G	IPR019145	GO:0001104,GO:0006357,GO:0016592
QFD.73xC.1.1	HORVU1Hr1G009580	undescribed protein	1H	21428701	21428901	-	No	HC_u	-	-
QFD.73xC.1.1	HORVU1Hr1G009590	Lr21, putative	1H	21431312	21439270	+	No	HC_G	-	-
QFD.73xC.1.1	HORVU1Hr1G009600	Leucine-rich receptor-like protein kinase family protein	1H	21508232	21511873	-	No	HC_G	IPR008266,IPR011009,IPR013320,IPR017441,IPR032675,IPR000719,IPR001611,IPR003591	GO:0006468,GO:0004672,GO:0005515,GO:0005524
QFD.73xC.1.1	HORVU1Hr1G009610	Leucine-rich repeat receptor-like protein kinase family protein	1H	21521217	21524727	+	No	HC_G	IPR032675,IPR001611,IPR003591,IPR013210	GO:0005515
QFD.73xC.1.1	HORVU1Hr1G009620	Polyprotein	1H	21666581	21666811	+	No	LC_TE	IPR012337	GO:0003676
QFD.73xC.1.1	HORVU1Hr1G009630	Chromosome 3B, genomic scaffold, cultivar Chinese Spring	1H	21743798	21750051	+	No	HC_U	-	-
QFD.73xC.1.1	HORVU1Hr1G009640	Chromosome 3B, genomic scaffold, cultivar Chinese Spring	1H	21793880	21796584	+	No	HC_U	-	-
QFD.73xC.1.1	HORVU1Hr1G009650	unknown function	1H	21797138	21797707	-	No	LC_TE	IPR026960	-
QFD.73xC.1.1	HORVU1Hr1G009660	Retrotransposon protein, putative, unclassified	1H	21798491	21798769	-	No	LC_TE	IPR000477	-
QFD.73xC.1.1	HORVU1Hr1G009670	unknown function	1H	21798794	21799039	-	No	LC_TE	IPR000477	-
QFD.73xC.1.1	HORVU1Hr1G009680	Retrotransposon protein, putative, unclassified	1H	21808411	21808749	-	No	LC_TE	IPR005135	-
QFD.73xC.1.1	HORVU1Hr1G009690	undescribed protein	1H	21848871	21849809	+	No	LC_u	-	-
QFD.73xC.1.1	HORVU1Hr1G009700	undescribed protein	1H	21870235	21871234	-	No	LC_u	-	-
QFD.73xC.1.1	HORVU1Hr1G009710	undescribed protein	1H	21873691	21874971	-	No	LC_u	-	-
QFD.73xC.1.1	HORVU1Hr1G009720	Carboxyl-terminal-processing protease	1H	21875477	21875923	+	No	HC_G	-	-
QFD.73xC.1.1	HORVU1Hr1G009730	undescribed protein	1H	21913625	21914629	+	No	LC_u	-	-
QFD.73xC.1.1	HORVU1Hr1G009740	Retrotransposon protein, putative, unclassified	1H	21919166	21920936	+	No	LC_TE	IPR029472	-
QFD.73xC.1.1	HORVU1Hr1G009750	Polyprotein	1H	21927681	21927818	+	No	LC_TE	IPR012337	GO:0003676
QFD.73xC.1.1	HORVU1Hr1G009760	unknown function	1H	22018113	22019821	+	No	LC_U	-	-
QFD.73xC.1.1	HORVU1Hr1G009770	undescribed protein	1H	22024537	22025995	-	No	LC_u	-	-
QFD.73xC.1.1	HORVU1Hr1G009780	undescribed protein	1H	22026583	22027216	-	No	LC_u	-	-
QFD.73xC.1.1	HORVU1Hr1G009790	undescribed protein	1H	22027291	22029252	-	No	LC_u	-	-
QFD.73xC.1.1	HORVU1Hr1G009800	Bifunctional inhibitor/lipid-transfer protein/seed storage 2S albumin superfamily protein	1H	22031182	22032411	-	No	HC_G	IPR000528,IPR016140	GO:0006869,GO:0008289
QFD.73xC.1.1	HORVU1Hr1G009810	unknown function	1H	22094151	22094810	+	No	LC_U	-	-
QFD.73xC.1.1	HORVU1Hr1G009820	undescribed protein	1H	22127272	22143229	+	No	LC_u	-	-
QFD.73xC.1.1	HORVU1Hr1G009830	undescribed protein	1H	22129336	22129874	+	No	LC_u	-	-
QFD.73xC.1.1	HORVU1Hr1G009840	undescribed protein	1H	22136585	22137818	-	No	LC_u	-	-
QFD.73xC.1.1	HORVU1Hr1G009850	undescribed protein	1H	22138590	22142042	-	No	LC_u	-	-
QFD.73xC.1.1	HORVU1Hr1G009860	hAT family dimerisation domain	1H	22146432	22156647	+	No	LC_TE	IPR008906,IPR012337	GO:0003676,GO:0046983
QFD.73xC.1.1	HORVU1Hr1G009870	Fusarium graminearum chromosome 2, complete genome	1H	22153185	22154849	-	No	HC_G	-	-
QFD.73xC.1.1	HORVU1Hr1G009880	undescribed protein	1H	22161111	22162182	-	No	HC_U	IPR022059	-
QFD.73xC.1.1	HORVU1Hr1G009890	undescribed protein	1H	22163057	22163314	-	No	LC_u	-	-
QFD.73xC.1.1	HORVU1Hr1G009900	Nuclear pore complex protein NUP107	1H	22166621	22176854	+	No	HC_G	IPR007252	GO:0005643,GO:0006810
QFD.73xC.1.1	HORVU1Hr1G009910	unknown function	1H	22179163	22179855	+	No	HC_TE?	IPR025558,IPR025836	-
QFD.73xC.1.1	HORVU1Hr1G009920	ABC transporter G family member 5	1H	22229888	22334833	-	No	HC_G	IPR017871,IPR027417,IPR003439,IPR003593,IPR013525	GO:0005524,GO:0016020,GO:0016887
QFD.73xC.1.1	HORVU1Hr1G009930	undescribed protein	1H	22256911	22258302	-	No	LC_u	-	-
QFD.73xC.1.1	HORVU1Hr1G009940	unknown function	1H	22521909	22522880	+	No	HC_U	-	-
QFD.73xC.1.1	HORVU1Hr1G009950	arginine/serine-rich splicing factor 35	1H	22563567	22568066	+	No	HC_TE?	IPR000504,IPR001878,IPR012677	GO:0000166,GO:0003676,GO:0008270
QFD.73xC.1.1	HORVU1Hr1G009960	undescribed protein	1H	22565464	22567477	-	No	LC_u	-	-
QFD.73xC.1.1	HORVU1Hr1G009970	undescribed protein	1H	22572719	22577954	+	No	HC_u	-	-
QFD.73xC.1.1	HORVU1Hr1G009980	Peptidyl-prolyl cis-trans isomerase	1H	22601114	22601983	+	No	HC_G	IPR007062	GO:0004864,GO:0009966,GO:0043666
QFD.73xC.1.1	HORVU1Hr1G009990	undescribed protein	1H	22731652	22732500	+	No	LC_u	-	-
QFD.73xC.1.1	HORVU1Hr1G010000	undescribed protein	1H	22740777	22741070	+	No	LC_u	-	-
QFD.73xC.1.1	HORVU1Hr1G010010	beta-glucosidase 47	1H	22742020	22754301	-	No	HC_G	IPR001360,IPR013781,IPR017853	GO:0004553,GO:0005975
QFD.73xC.1.1	HORVU1Hr1G010020	beta glucosidase 46	1H	22754521	22757147	+	No	HC_G	IPR001360,IPR013781,IPR017853	GO:0004553,GO:0005975
QFD.73xC.1.1	HORVU1Hr1G010030	undescribed protein	1H	22837541	22837932	-	No	LC_u	-	-
QFD.73xC.1.1	HORVU1Hr1G010040	undescribed protein	1H	22838279	22842573	-	No	LC_u	-	-
QFD.73xC.1.1	HORVU1Hr1G010050	undescribed protein	1H	22841663	22841885	-	No	LC_u	-	-
QFD.73xC.1.1	HORVU1Hr1G010060	undescribed protein	1H	22850868	22853775	-	No	LC_u	-	-
QFD.73xC.1.1	HORVU1Hr1G010070	undescribed protein	1H	22863026	22864734	-	No	LC_u	-	-
QFD.73xC.1.1	HORVU1Hr1G010080	undescribed protein	1H	22916799	22917233	+	No	LC_u	-	-
QFD.73xC.1.1	HORVU1Hr1G010090	unknown function	1H	22950303	22950533	-	No	LC_U	-	-
QFD.73xC.1.1	HORVU1Hr1G010100	Retrotransposon protein, putative, unclassified	1H	22960800	22961204	-	No	LC_TE	-	-
QFD.73xC.1.1	HORVU1Hr1G010110	Carboxypeptidase Y homolog A	1H	23013097	23015506	-	No	HC_G	IPR001563,IPR029058	GO:0004185,GO:0006508
QFD.73xC.1.1	HORVU1Hr1G010120	L-tyrosine decarboxylase	1H	23049281	23051244	+	No	HC_G	IPR015422,IPR015424,IPR021115,IPR002129,IPR010977,IPR015421	GO:0019752,GO:0030170,GO:0003824,GO:0006520,GO:0016831
QFD.73xC.1.1	HORVU1Hr1G010130	alcohol dehydrogenase 1	1H	23059462	23064407	+	No	HC_G	IPR013154,IPR016040,IPR020843,IPR002328,IPR011032,IPR013149	GO:0008270,GO:0016491,GO:0055114
QFD.73xC.1.1	HORVU1Hr1G010140	Helicase-like protein	1H	23145249	23146922	+	No	HC_TE?	IPR010285,IPR027417	GO:0000723,GO:0003678,GO:0006281
QFD.73xC.1.1	HORVU1Hr1G010150	undescribed protein	1H	23148173	23148513	-	No	LC_u	-	-
QFD.73xC.1.1	HORVU1Hr1G010160	undescribed protein	1H	23149003	23149618	-	No	LC_u	-	-
QFD.73xC.1.1	HORVU1Hr1G010170	undescribed protein	1H	23149937	23150359	+	No	LC_u	-	-
QFD.73xC.1.1	HORVU1Hr1G010180	undescribed protein	1H	23150509	23150853	+	No	LC_u	-	-
QFD.73xC.1.1	HORVU1Hr1G010190	Galactosyltransferase family protein	1H	23151513	23165583	-	No	HC_G	IPR002659	GO:0006486,GO:0008378,GO:0016020
QFD.73xC.1.1	HORVU1Hr1G010200	Chromosome 3B, genomic scaffold, cultivar Chinese Spring	1H	23154414	23155444	+	No	LC_U	-	-
QFD.73xC.1.1	HORVU1Hr1G010210	Bidirectional sugar transporter N3	1H	23166693	23169065	+	No	HC_G	IPR004316	GO:0016021
QFD.73xC.1.1	HORVU1Hr1G010220	Pentatricopeptide repeat-containing protein	1H	23198930	23202488	-	No	HC_G	IPR002885	-
QFD.73xC.1.1	HORVU1Hr1G010230	Defensin-like protein	1H	23219158	23220160	+	No	HC_G	IPR003614,IPR008176,IPR008177	GO:0006952
QFD.73xC.1.1	HORVU1Hr1G010240	undescribed protein	1H	23221586	23223279	-	No	LC_u	-	-
QFD.73xC.1.1	HORVU1Hr1G010250	Defensin-like protein	1H	23223496	23224757	+	No	HC_G	IPR003614,IPR008176,IPR008177	GO:0006952
QFD.73xC.1.1	HORVU1Hr1G010260	undescribed protein	1H	23231541	23232229	+	No	LC_u	-	-
QFD.73xC.1.1	HORVU1Hr1G010270	undescribed protein	1H	23297801	23301152	-	No	LC_u	-	-
QFD.73xC.1.1	HORVU1Hr1G010280	Chromosome 3B, genomic scaffold, cultivar Chinese Spring	1H	23326791	23327917	-	No	HC_TE?	IPR001810	GO:0005515
QFD.73xC.1.1	HORVU1Hr1G010290	undescribed protein	1H	23477946	23478191	-	No	LC_u	-	-
QFD.73xC.1.1	HORVU1Hr1G010300	Protein of Unknown Function (DUF239)	1H	23478023	23480932	+	No	HC_U	IPR004314	-
QFD.73xC.1.1	HORVU1Hr1G010310	undescribed protein	1H	23481314	23482580	+	No	LC_u	-	-
QFD.73xC.1.1	HORVU1Hr1G010320	undescribed protein	1H	23482700	23483661	+	No	LC_u	-	-
QFD.73xC.1.1	HORVU1Hr1G010330	undescribed protein	1H	23484098	23485720	-	No	LC_u	-	-
QFD.73xC.1.1	HORVU1Hr1G010340	Gag-pol polyprotein	1H	23530655	23534033	-	No	LC_TE	IPR025724,IPR001584,IPR012337,IPR013103	GO:0003676,GO:0015074
QFD.73xC.1.1	HORVU1Hr1G010350	ZmEBE-1 protein, putative	1H	23581094	23581877	-	No	HC_G	IPR004314	-
QFD.73xC.1.1	HORVU1Hr1G010360	Protein of Unknown Function (DUF239)	1H	23596766	23599186	-	No	HC_U	IPR004314	-
QFD.73xC.1.1	HORVU1Hr1G010370	undescribed protein	1H	23812044	23813097	-	No	LC_u	-	-
QFD.73xC.1.1	HORVU1Hr1G010380	WEB family protein At5g16730, chloroplastic	1H	23812071	23816472	+	No	HC_G	-	-
QFD.73xC.1.1	HORVU1Hr1G010390	Kinase interacting (KIP1-like) family protein	1H	23817223	23824219	+	No	HC_G	IPR011684	-
QFD.73xC.1.1	HORVU1Hr1G010400	Membrane protein, putative	1H	23869533	23871529	+	No	HC_G	IPR008537	-
QFD.73xC.1.1	HORVU1Hr1G010410	Transposon protein, putative, CACTA, En/Spm sub-class	1H	23893920	23894636	+	No	LC_TE	IPR027806	-
QFD.73xC.1.1	HORVU1Hr1G010420	unknown function	1H	23917814	23918983	-	No	LC_TE	IPR001878	GO:0003676,GO:0008270
QFD.73xC.1.1	HORVU1Hr1G010430	undescribed protein	1H	23919969	23920516	-	No	LC_u	-	-
QFD.73xC.1.1	HORVU1Hr1G010440	undescribed protein	1H	23922487	23926800	-	No	LC_u	-	-
QFD.73xC.1.1	HORVU1Hr1G010450	undescribed protein	1H	23929023	23932917	-	No	LC_u	-	-
QFD.73xC.1.1	HORVU1Hr1G010460	undescribed protein	1H	23930333	23930953	+	No	LC_u	-	-
QFD.73xC.1.1	HORVU1Hr1G010470	undescribed protein	1H	23932623	23949567	+	No	LC_u	-	-
QFD.73xC.1.1	HORVU1Hr1G010480	undescribed protein	1H	23935990	23949521	-	No	LC_u	-	-
QFD.73xC.1.1	HORVU1Hr1G010490	Coffea canephora DH200=94 genomic scaffold, scaffold_22	1H	24024884	24026844	-	No	LC_U	IPR005226	-
QFD.73xC.1.1	HORVU1Hr1G010500	unknown function	1H	24025415	24025888	+	No	HC_U	-	-
QFD.73xC.1.1	HORVU1Hr1G010510	unknown protein	1H	24027681	24031174	-	No	HC_U
QFD.73xC.1.1	HORVU1Hr1G010520	Protein kinase superfamily protein	1H	24038202	24043602	-	No	HC_G	IPR011009,IPR020635,IPR000719,IPR001245,IPR008271	GO:0006468,GO:0004672,GO:0004713,GO:0005524
QFD.73xC.1.1	HORVU1Hr1G010530	UDP-Glycosyltransferase superfamily protein	1H	24041667	24043602	+	No	HC_G	-	-
QFD.73xC.1.1	HORVU1Hr1G010540	undescribed protein	1H	24135676	24136306	+	No	LC_u	-	-
QFD.73xC.1.1	HORVU1Hr1G010550	unknown function	1H	24141388	24141853	+	No	LC_U	-	-
QFD.73xC.1.1	HORVU1Hr1G010560	4-hydroxy-4-methyl-2-oxoglutarate aldolase	1H	24303106	24303651	-	No	HC_G	IPR005493	-
QFD.73xC.1.1	HORVU1Hr1G010570	undescribed protein	1H	24403309	24404722	+	No	LC_u	-	-
QFD.73xC.1.1	HORVU1Hr1G010580	WUSCHEL related homeobox 1	1H	24444001	24445742	+	No	HC_G	IPR001356,IPR009057	GO:0003677
QFD.73xC.1.1	HORVU1Hr1G010590	undescribed protein	1H	24444004	24444668	-	No	LC_u	-	-
QFD.73xC.1.1	HORVU1Hr1G010600	germin-like protein 2	1H	24518382	24519271	-	No	HC_G	IPR014710,IPR019780,IPR001929,IPR006045,IPR011051	GO:0030145,GO:0045735
QFD.73xC.1.1	HORVU1Hr1G010610	Retrotransposon protein, putative, unclassified, expressed	1H	24522285	24522959	+	No	LC_TE	-	-
QFD.73xC.1.1	HORVU1Hr1G010620	Retrotransposon protein, putative, Ty1-copia subclass	1H	24534200	24534616	+	No	LC_TE	-	-
QFD.73xC.1.1	HORVU1Hr1G010630	Retrotransposon protein, putative, Ty1-copia subclass	1H	24562693	24562896	-	No	LC_TE	-	-
QFD.73xC.1.1	HORVU1Hr1G010640	germin-like protein 2	1H	24637569	24638448	+	No	HC_G	IPR014710,IPR019780,IPR001929,IPR006045,IPR011051	GO:0030145,GO:0045735
QFD.73xC.1.1	HORVU1Hr1G010650	undescribed protein	1H	24637743	24638359	-	No	LC_u	-	-
QFD.73xC.1.1	HORVU1Hr1G010660	unknown function	1H	24652302	24652568	+	No	HC_U	-	-
QFD.73xC.1.1	HORVU1Hr1G010670	GDSL esterase/lipase	1H	24655081	24658793	+	No	HC_G	IPR001087,IPR013830	GO:0016788
QFD.73xC.1.1	HORVU1Hr1G010680	undescribed protein	1H	24655349	24657820	-	No	LC_u	-	-
QFD.73xC.1.1	HORVU1Hr1G010690	unknown function	1H	24667238	24667844	-	No	LC_TE	IPR026960	-
QFD.73xC.1.1	HORVU1Hr1G010700	unknown function	1H	24670227	24670454	-	No	LC_TE	IPR005135	-
QFD.73xC.1.1	HORVU1Hr1G010710	germin-like protein 2	1H	24680681	24681552	-	No	HC_G	IPR014710,IPR019780,IPR001929,IPR006045,IPR011051	GO:0030145,GO:0045735
QFD.73xC.1.1	HORVU1Hr1G010720	Protein of Unknown Function (DUF239)	1H	24698530	24701661	-	No	HC_U	IPR004314	-
QFD.73xC.1.1	HORVU1Hr1G010730	CASP-like protein	1H	24712118	24712961	+	No	HC_G	IPR006702	-
QFD.73xC.1.1	HORVU1Hr1G010740	germin-like protein 2	1H	24727610	24728384	-	No	HC_G	IPR014710,IPR019780,IPR001929,IPR006045,IPR011051	GO:0030145,GO:0045735
QFD.73xC.1.1	HORVU1Hr1G010750	F-box/LRR-repeat protein 14	1H	24839109	24842597	+	No	LC_TE?	IPR001810,IPR006553,IPR032675	GO:0005515
QFD.73xC.1.1	HORVU1Hr1G010760	undescribed protein	1H	24843585	24845653	-	No	LC_u	-	-
QFD.73xC.1.1	HORVU1Hr1G010770	undescribed protein	1H	24844041	24844662	+	No	LC_u	-	-
QFD.73xC.1.1	HORVU1Hr1G010780	sensitivity to red light reduced protein (SRR1)	1H	25045249	25052856	+	No	HC_G	IPR012942	-
QFD.73xC.1.1	HORVU1Hr1G010790	Protein of unknown function (DUF1639)	1H	25054403	25055560	-	No	HC_U	IPR012438	-
QFD.73xC.1.1	HORVU1Hr1G010800	Nuclear factor related to kappa-B-binding protein	1H	25327479	25332827	+	No	HC_G	-	-
QFD.73xC.1.1	HORVU1Hr1G010810	kinesin 3	1H	25333286	25340208	-	No	HC_G	IPR001752,IPR019821,IPR027417	GO:0008017,GO:0003777,GO:0005524,GO:0007018
QFD.73xC.1.1	HORVU1Hr1G010820	Ribonuclease II/R family protein	1H	25397874	25405736	-	No	HC_G	IPR011991,IPR012340	-
QFD.73xC.1.1	HORVU1Hr1G010830	Orphans transcription factor	1H	25404109	25405394	+	No	HC_G	-	-
QFD.73xC.1.1	HORVU1Hr1G010840	ENTH/VHS family protein	1H	25414753	25416323	+	No	HC_G	IPR008942,IPR013809	-
QFD.73xC.1.1	HORVU1Hr1G010850	undescribed protein	1H	25436743	25437541	+	No	LC_u	-	-
QFD.73xC.1.1	HORVU1Hr1G010860	unknown function	1H	25529725	25530354	-	No	LC_TE	IPR019557	-
QFD.73xC.1.1	HORVU1Hr1G010870	undescribed protein	1H	25530646	25530873	+	No	LC_u	-	-
QFD.73xC.1.1	HORVU1Hr1G010880	unknown function	1H	25530868	25531053	-	No	LC_TE	IPR019557	-
QFD.73xC.1.1	HORVU1Hr1G010890	Pentatricopeptide repeat-containing protein	1H	25534752	25545143	-	No	HC_G	IPR002885,IPR011990	GO:0005515
QFD.73xC.1.1	HORVU1Hr1G010900	undescribed protein	1H	25639726	25640244	+	No	LC_u	-	-
QFD.73xC.1.1	HORVU1Hr1G010910	Glucan endo-1,3-beta-glucosidase 10	1H	25920505	25922583	+	No	HC_G	IPR000490,IPR013781,IPR017853	GO:0004553,GO:0005975
QFD.73xC.1.1	HORVU1Hr1G010920	O-methyltransferase ZRP4	1H	25929486	25929611	+	No	HC_G	-	-
QFD.73xC.1.1	HORVU1Hr1G010930	integral membrane TerC family protein	1H	25940165	25954849	-	No	HC_G	IPR005496,IPR022369	GO:0016021
QFD.73xC.1.1	HORVU1Hr1G010940	Transmembrane protein, putative	1H	25940217	25947638	+	No	HC_G	IPR009606	-
QFD.73xC.1.1	HORVU1Hr1G010950	Zinc finger protein 76	1H	25948990	25954860	+	No	LC_TE	IPR007087,IPR013087,IPR015880	GO:0003676,GO:0046872
QFD.73xC.1.1	HORVU1Hr1G010960	undescribed protein	1H	25966719	25970915	-	No	HC_u	-	-
QFD.73xC.1.1	HORVU1Hr1G010970	Pentatricopeptide repeat-containing protein	1H	25974212	25977830	+	No	HC_G	IPR002885,IPR011990	GO:0005515
QFD.73xC.1.1	HORVU1Hr1G010980	undescribed protein	1H	25982531	25982676	-	No	HC_u	-	-
QFD.73xC.1.1	HORVU1Hr1G010990	pentatricopeptide repeat 336	1H	26088691	26089581	-	No	HC_G	IPR002885,IPR011990	GO:0005515
QFD.73xC.1.1	HORVU1Hr1G011000	undescribed protein	1H	26190881	26191090	+	No	LC_u	-	-
QFD.73xC.1.1	HORVU1Hr1G011010	undescribed protein	1H	26194622	26194767	+	No	LC_u	-	-
QFD.73xC.1.1	HORVU1Hr1G011020	Pentatricopeptide repeat-containing protein	1H	26210756	26213657	-	No	HC_G	IPR002885,IPR011990	GO:0005515
QFD.73xC.1.1	HORVU1Hr1G011030	COP1-interacting protein-related	1H	26219976	26222603	-	No	HC_G	-	-
QFD.73xC.1.1	HORVU1Hr1G011040	Retrotransposon protein, putative, unclassified, expressed	1H	26224899	26226081	-	No	LC_TE	IPR001584,IPR012337	GO:0003676,GO:0015074
QFD.73xC.1.1	HORVU1Hr1G011050	Retrotransposon protein, putative, unclassified	1H	26226247	26226456	-	No	LC_TE	-	-
QFD.73xC.1.1	HORVU1Hr1G011060	2,3-bisphosphoglycerate-independent phosphoglycerate mutase	1H	26227687	26227917	-	No	HC_G	-	-
QFD.73xC.1.1	HORVU1Hr1G011070	unknown function	1H	26228205	26228465	-	No	LC_U	-	-
QFD.73xC.1.1	HORVU1Hr1G011080	Chlorophyll synthase, chloroplastic	1H	26228505	26228741	-	No	HC_G	-	-
QFD.73xC.1.1	HORVU1Hr1G011090	unknown function	1H	26228910	26229343	-	No	LC_U	-	-
QFD.73xC.1.1	HORVU1Hr1G011100	Glucan endo-1,3-beta-glucosidase 10	1H	26230867	26232965	+	No	HC_G	IPR000490,IPR013781,IPR017853	GO:0004553,GO:0005975
QFD.73xC.1.1	HORVU1Hr1G011110	Chlorophyll synthase, chloroplastic	1H	26240882	26241049	-	No	HC_G	-	-
QFD.73xC.1.1	HORVU1Hr1G011120	Peroxidase	1H	26318123	26318416	-	No	HC_G	-	-
QFD.73xC.1.1	HORVU1Hr1G011130	Retrotransposon protein, putative, Ty3-gypsy subclass	1H	26342529	26343372	+	No	LC_TE	IPR005162	-
QFD.73xC.1.1	HORVU1Hr1G011140	-	1H	26414307	26421222	-	No	-	-	-
QFD.73xC.1.1	HORVU1Hr1G011150	Pentatricopeptide repeat-containing protein	1H	26485431	26492426	+	No	HC_G	IPR002885,IPR011990	GO:0005515
QFD.73xC.1.1	HORVU1Hr1G011160	Pentatricopeptide repeat-containing protein	1H	26659342	26663225	+	No	HC_G	IPR002885,IPR011990	GO:0005515
QFD.73xC.1.1	HORVU1Hr1G011170	unknown function	1H	26696284	26696553	-	No	LC_TE	IPR000953,IPR016197,IPR023780	-
QFD.73xC.1.1	HORVU1Hr1G011180	Nuclear transcription factor Y subunit C-2	1H	26701036	26701215	-	No	HC_G	-	-
QFD.73xC.1.1	HORVU1Hr1G011190	undescribed protein	1H	26710616	26710900	-	No	HC_u	-	-
QFD.73xC.1.1	HORVU1Hr1G011200	Ubiquinol oxidase	1H	26711000	26711140	-	No	HC_G	-	-
QFD.73xC.1.1	HORVU1Hr1G011210	Glucan endo-1,3-beta-glucosidase 10	1H	26712578	26713968	-	No	HC_G	IPR000490,IPR013781,IPR017853	GO:0004553,GO:0005975
QFD.73xC.1.1	HORVU1Hr1G011220	2,3-bisphosphoglycerate-independent phosphoglycerate mutase	1H	26801022	26801210	+	No	HC_G	-	-
QFD.73xC.1.1	HORVU1Hr1G011230	Retrotransposon protein, putative, unclassified	1H	26802429	26802692	+	No	LC_TE	-	-
QFD.73xC.1.1	HORVU1Hr1G011240	pentatricopeptide repeat 336	1H	26817446	26818082	+	No	HC_G	IPR002885	-
QFD.73xC.1.1	HORVU1Hr1G011250	pentatricopeptide repeat 336	1H	26852674	26865346	+	No	HC_G	IPR002885,IPR011990	GO:0005515
QFD.73xC.1.1	HORVU1Hr1G011260	Glucan endo-1,3-beta-glucosidase 10	1H	26858162	26859915	-	No	HC_G	IPR000490,IPR013781,IPR017853	GO:0004553,GO:0005975
QFD.73xC.1.1	HORVU1Hr1G011270	-	1H	26865862	26869015	+	No	-	-	-
QFD.73xC.1.1	HORVU1Hr1G011280	undescribed protein	1H	26923264	26923773	-	No	LC_u	-	-
QFD.73xC.1.1	HORVU1Hr1G011290	pentatricopeptide repeat 336	1H	26965962	26966726	+	No	HC_G	IPR002885,IPR011990	GO:0005515
QFD.73xC.1.1	HORVU1Hr1G011300	Pentatricopeptide repeat-containing protein	1H	27069862	27075385	+	No	HC_G	IPR002885,IPR011990	GO:0005515
QFD.73xC.1.1	HORVU1Hr1G011310	undescribed protein	1H	27152387	27154867	-	No	LC_u	-	-
QFD.73xC.1.1	HORVU1Hr1G011320	undescribed protein	1H	27152413	27154882	+	No	LC_u	-	-
QFD.73xC.1.1	HORVU1Hr1G011330	undescribed protein	1H	27172873	27174336	-	No	LC_u	-	-
QFD.73xC.1.1	HORVU1Hr1G011340	undescribed protein	1H	27176452	27176747	-	No	LC_u	-	-
QFD.73xC.1.1	HORVU1Hr1G011350	Transducin/WD40 repeat-like superfamily protein	1H	27353739	27354160	+	No	HC_G	-	-
QFD.73xC.1.1	HORVU1Hr1G011360	undescribed protein	1H	27356828	27357949	-	No	HC_U	IPR010605	-
QFD.73xC.1.1	HORVU1Hr1G011370	F-box family protein	1H	27435356	27438060	+	No	HC_TE?	IPR001810,IPR006553,IPR032675	GO:0005515
QFD.73xC.1.1	HORVU1Hr1G011380	undescribed protein	1H	27439081	27439928	+	No	HC_u	-	-
QFD.73xC.1.1	HORVU1Hr1G011390	undescribed protein	1H	27442084	27443485	+	No	HC_u	-	-
QFD.73xC.1.1	HORVU1Hr1G011400	Pentatricopeptide repeat-containing protein	1H	27442499	27458523	-	No	HC_G	IPR002885	-
QFD.73xC.1.1	HORVU1Hr1G011410	undescribed protein	1H	27445896	27447374	+	No	LC_u	-	-
QFD.73xC.1.1	HORVU1Hr1G011420	ABL interactor-like protein 3	1H	27448995	27453549	+	No	HC_G	-	-
QFD.73xC.1.1	HORVU1Hr1G011430	Pyrimidine-specific ribonucleoside hydrolase RihA	1H	27635089	27640155	+	No	HC_G	IPR001910	-
QFD.73xC.1.1	HORVU1Hr1G011440	Secologanin synthase	1H	27640397	27641156	+	No	HC_G	-	-
QFD.73xC.1.1	HORVU1Hr1G011450	undescribed protein	1H	27684503	27685760	+	No	HC_u	-	-
QFD.73xC.1.1	HORVU1Hr1G011460	Retrotransposon protein, putative, Ty1-copia subclass	1H	27737573	27737808	-	No	LC_TE	-	-
QFD.73xC.1.1	HORVU1Hr1G011470	Retrotransposon protein, putative, Ty1-copia subclass	1H	27738475	27738891	-	No	LC_TE	IPR029472	-
QFD.73xC.1.1	HORVU1Hr1G011480	tRNA dimethylallyltransferase	1H	27827676	27830691	+	No	HC_G	IPR018022,IPR027417	GO:0008033
QFD.73xC.1.1	HORVU1Hr1G011490	Chromosome 3B, genomic scaffold, cultivar Chinese Spring	1H	27842175	27843491	+	No	HC_TE?	IPR001810	GO:0005515
QFD.73xC.1.1	HORVU1Hr1G011500	SNARE associated Golgi protein family	1H	27846463	27847458	-	No	HC_G	IPR032816	-
QFD.73xC.1.1	HORVU1Hr1G011510	undescribed protein	1H	27862278	27862509	+	No	LC_u	-	-
QFD.73xC.1.1	HORVU1Hr1G011520	Glutamyl-tRNA reductase family protein	1H	27864866	27868419	+	No	HC_G	IPR015896,IPR016040,IPR018214,IPR000343,IPR006151,IPR015895	GO:0055114,GO:0008883,GO:0033014,GO:0050661
QFD.73xC.1.1	HORVU1Hr1G011530	Pentatricopeptide repeat-containing protein	1H	27864866	27872006	-	No	HC_G	IPR002885	-
QFD.73xC.1.1	HORVU1Hr1G011540	MAK16 protein-related	1H	27962413	27964061	+	No	HC_G	IPR006958	-
QFD.73xC.1.1	HORVU1Hr1G011550	alpha/beta-Hydrolases superfamily protein	1H	27971381	27972468	-	No	HC_G	IPR029058	-
QFD.73xC.1.1	HORVU1Hr1G011560	undescribed protein	1H	28008771	28009059	-	No	LC_u	-	-
QFD.73xC.1.1	HORVU1Hr1G011570	alpha/beta-Hydrolases superfamily protein	1H	28045154	28046241	+	No	HC_G	IPR029058	-
QFD.73xC.1.1	HORVU1Hr1G011580	undescribed protein	1H	28050865	28051281	-	No	LC_u	-	-
QFD.73xC.1.1	HORVU1Hr1G011590	undescribed protein	1H	28050865	28052758	+	No	LC_u	-	-
QFD.73xC.1.1	HORVU1Hr1G011600	F-box family protein	1H	28056442	28062129	+	No	LC_TE?	IPR001810,IPR032675	GO:0005515
QFD.73xC.1.1	HORVU1Hr1G011610	unknown function	1H	28059407	28062129	-	No	HC_G	IPR005516	-
QFD.73xC.1.1	HORVU1Hr1G011620	undescribed protein	1H	28071560	28072046	+	No	LC_u	-	-
QFD.73xC.1.1	HORVU1Hr1G011630	Lysine-specific demethylase 5B	1H	28128239	28128472	-	No	HC_G	-	-
QFD.73xC.1.1	HORVU1Hr1G011640	-	1H	28133986	28134267	.	No	-	-	-
QFD.73xC.1.1	HORVU1Hr1G011650	Wall-associated receptor kinase 2	1H	28135415	28140466	+	No	HC_G	IPR018097,IPR000152,IPR000742,IPR001881	GO:0005509,GO:0005515
QFD.73xC.1.1	HORVU1Hr1G011660	receptor kinase 2	1H	28142050	28156114	+	No	HC_G	IPR011009,IPR000719,IPR002290,IPR008271	GO:0004672,GO:0005524,GO:0006468
QFD.73xC.1.1	HORVU1Hr1G011670	-	1H	28146043	28146272	.	No	-	-	-
QFD.73xC.1.1	HORVU1Hr1G011680	undescribed protein	1H	28148473	28149243	-	No	LC_u	-	-
QFD.73xC.1.1	HORVU1Hr1G011690	undescribed protein	1H	28177040	28177948	-	No	LC_u	-	-
QFD.73xC.1.1	HORVU1Hr1G011700	undescribed protein	1H	28178954	28183352	+	No	LC_u	-	-
QFD.73xC.1.1	HORVU1Hr1G011710	undescribed protein	1H	28179737	28183366	-	No	LC_u	-	-
QFD.73xC.1.1	HORVU1Hr1G011720	Disease resistance protein	1H	28250787	28255706	+	No	HC_G	IPR002182,IPR027417,IPR032675	GO:0043531
QFD.73xC.1.1	HORVU1Hr1G011730	Cysteine-rich receptor-like protein kinase 25	1H	28255842	28262974	-	No	HC_G	-	-
QFD.73xC.1.1	HORVU1Hr1G011740	unknown function	1H	28264247	28264474	+	No	HC_U	-	-
QFD.73xC.1.1	HORVU1Hr1G011750	undescribed protein	1H	28267930	28268218	-	No	LC_u	-	-
QFD.73xC.1.1	HORVU1Hr1G011760	Transposon Ty1-OL Gag-Pol polyprotein	1H	28324750	28326327	+	No	LC_TE	IPR013103	-
QFD.73xC.1.1	HORVU1Hr1G011770	undescribed protein	1H	28553342	28553766	-	No	LC_u	-	-
QFD.73xC.1.1	HORVU1Hr1G011780	Structural constituent of ribosome	1H	28590172	28590972	-	No	HC_G	-	-
QFD.73xC.1.1	HORVU1Hr1G011790	undescribed protein	1H	28643001	28644096	+	No	LC_u	-	-
QFD.73xC.1.1	HORVU1Hr1G011800	AP2-like ethylene-responsive transcription factor	1H	28643155	28647966	-	No	HC_G	IPR001471,IPR016177	GO:0003677,GO:0003700,GO:0006355
QFD.73xC.1.1	HORVU1Hr1G011810	undescribed protein	1H	28730944	28733331	-	No	LC_u	-	-
QFD.73xC.1.1	HORVU1Hr1G011820	Elongation factor 2	1H	28745749	28747663	-	No	HC_G	IPR009022	-
QFD.73xC.1.1	HORVU1Hr1G011830	Speckle-type POZ protein-like protein	1H	28747832	28748147	+	No	HC_G	-	-
QFD.73xC.1.1	HORVU1Hr1G011840	DNA repair (Rad51) family protein	1H	28822521	28827237	+	No	HC_G	IPR013632,IPR020588,IPR027417	GO:0008094,GO:0003677,GO:0005524,GO:0006281
QFD.73xC.1.1	HORVU1Hr1G011850	undescribed protein	1H	28860813	28862439	-	No	LC_u	-	-
QFD.73xC.1.1	HORVU1Hr1G011860	receptor-like protein kinase 1	1H	28887974	28895056	-	No	HC_G	IPR001881,IPR002290,IPR008271,IPR011009,IPR013320,IPR017441,IPR018097,IPR025287,IPR000152,IPR000719,IPR000742	GO:0005524,GO:0006468,GO:0030247,GO:0004672,GO:0005509,GO:0005515
QFD.73xC.1.1	HORVU1Hr1G011870	undescribed protein	1H	29069215	29075238	-	No	LC_u	-	-
QFD.73xC.1.1	HORVU1Hr1G011880	undescribed protein	1H	29069221	29075238	+	No	LC_u	-	-
QFD.73xC.1.1	HORVU1Hr1G011890	Nucleotide-sugar transporter family protein	1H	29080209	29084378	+	No	HC_G	IPR004853	-
QFD.73xC.1.1	HORVU1Hr1G011900	unknown function	1H	29080611	29086514	-	No	HC_U	-	-
QFD.73xC.1.1	HORVU1Hr1G011910	undescribed protein	1H	29105930	29106832	-	No	LC_u	-	-
QFD.73xC.1.1	HORVU1Hr1G011920	lysine histidine transporter 2	1H	29183222	29184622	+	No	HC_G	IPR013057	-
QFD.73xC.1.1	HORVU1Hr1G011930	O-methyltransferase 1	1H	29359791	29361653	+	No	HC_G	IPR016461,IPR029063,IPR001077,IPR011991,IPR012967	GO:0008168,GO:0008171,GO:0046983
QFD.73xC.1.1	HORVU1Hr1G011940	Retrotransposon protein, putative, unclassified	1H	29363702	29363927	-	No	LC_TE	IPR026960	-
QFD.73xC.1.1	HORVU1Hr1G011950	Caffeic acid 3-O-methyltransferase	1H	29583404	29584107	+	No	HC_G	IPR011991,IPR012967,IPR016461	GO:0008168,GO:0046983
QFD.73xC.1.1	HORVU1Hr1G011960	unknown function	1H	29796142	29796462	-	No	HC_U	-	-
QFD.73xC.1.1	HORVU1Hr1G011970	unknown function	1H	29844596	29844829	+	No	LC_TE	IPR026960	-
QFD.73xC.1.1	HORVU1Hr1G011980	exoribonuclease 4	1H	29866368	29867080	-	No	HC_G	-	-
QFD.73xC.1.1	HORVU1Hr1G011990	Chymotrypsin inhibitor	1H	29887921	29903349	+	No	HC_G	IPR000864	GO:0004867,GO:0009611
QFD.73xC.1.1	HORVU1Hr1G012000	undescribed protein	1H	29887972	29888985	-	No	LC_u	-	-
QFD.73xC.1.1	HORVU1Hr1G012010	undescribed protein	1H	29892770	29893204	+	No	LC_u	-	-
QFD.73xC.1.1	HORVU1Hr1G012020	unknown function	1H	29895942	29896294	-	No	LC_U	-	-
QFD.73xC.1.1	HORVU1Hr1G012030	unknown function	1H	29896416	29896643	-	No	LC_U	-	-
QFD.73xC.1.1	HORVU1Hr1G012040	unknown function	1H	29898403	29899497	-	No	LC_TE	IPR005135	-
QFD.73xC.1.1	HORVU1Hr1G012050	undescribed protein	1H	29903941	29904043	-	No	LC_u	-	-
QFD.73xC.1.1	HORVU1Hr1G012060	Chymotrypsin inhibitor	1H	29909493	29910252	-	No	HC_G	IPR000864	GO:0004867,GO:0009611
QFD.73xC.1.1	HORVU1Hr1G012070	undescribed protein	1H	29926987	29927353	-	No	LC_u	-	-
QFD.73xC.1.1	HORVU1Hr1G012080	Proteinase inhibitor	1H	29927409	29927674	+	No	HC_G	IPR000864	GO:0004867,GO:0009611
QFD.73xC.1.1	HORVU1Hr1G012090	Subtilisin-chymotrypsin inhibitor CI-1B	1H	29942146	29943179	-	No	HC_G	IPR000864	GO:0004867,GO:0009611
QFD.73xC.1.1	HORVU1Hr1G012100	-	1H	29971923	29972462	+	No	-	-	-
QFD.73xC.1.1	HORVU1Hr1G012110	xylulose kinase-1	1H	30092809	30095436	+	No	HC_G	IPR018484,IPR018485	GO:0005975,GO:0016773
QFD.73xC.1.1	HORVU1Hr1G012120	undescribed protein	1H	30104202	30104672	+	No	LC_u	-	-
QFD.73xC.1.1	HORVU1Hr1G012130	Chymotrypsin inhibitor	1H	30134660	30134911	-	No	HC_G	IPR000864	GO:0004867,GO:0009611
QFD.73xC.1.1	HORVU1Hr1G012140	PATATIN-like protein 4	1H	30191336	30193515	+	No	HC_G	IPR002641,IPR016035	GO:0006629,GO:0008152
QFD.73xC.1.1	HORVU1Hr1G012150	xylulose kinase-1	1H	30202033	30204348	+	No	HC_G	IPR018484,IPR018485	GO:0005975,GO:0016773
QFD.73xC.1.1	HORVU1Hr1G012160	undescribed protein	1H	30213426	30213896	+	No	LC_u	-	-
QFD.73xC.1.1	HORVU1Hr1G012170	Chymotrypsin inhibitor	1H	30252793	30253312	-	No	HC_G	IPR000864	GO:0004867,GO:0009611
QFD.73xC.1.1	HORVU1Hr1G012180	Disease resistance protein RPP13	1H	30263786	30268673	+	No	HC_G	IPR002182,IPR027417	GO:0043531
QFD.73xC.1.1	HORVU1Hr1G012190	Disease resistance protein	1H	30295692	30300005	-	No	HC_G	IPR002182,IPR027417,IPR032675	GO:0043531
QFD.73xC.1.1	HORVU1Hr1G012200	FAR1-related sequence 7	1H	30413715	30417409	-	No	LC_TE?	IPR004330,IPR018289	-
QFD.73xC.1.1	HORVU1Hr1G012210	Protein of Unknown Function (DUF239)	1H	30546231	30550244	+	No	HC_U	IPR004314	-
QFD.73xC.1.1	HORVU1Hr1G012220	AT2G18410-like protein	1H	30581853	30582709	-	No	HC_G	-	-
QFD.73xC.1.1	HORVU1Hr1G012230	undescribed protein	1H	30598140	30598934	-	No	LC_u	-	-
QFD.73xC.1.1	HORVU1Hr1G012240	Adenine/guanine permease AZG1	1H	30599427	30603303	+	No	HC_G	IPR006043	GO:0055085,GO:0005215,GO:0006810,GO:0016020
QFD.73xC.1.1	HORVU1Hr1G012250	Acidic leucine-rich nuclear phosphoprotein 32-related protein 1	1H	30733959	30734716	+	No	HC_G	IPR001611,IPR032675	GO:0005515
QFD.73xC.1.1	HORVU1Hr1G012260	unknown function	1H	30798206	30800481	-	No	LC_U	IPR008004	-
QFD.73xC.1.1	HORVU1Hr1G012270	undescribed protein	1H	30799124	30799903	+	No	HC_u	-	-
QFD.73xC.1.1	HORVU1Hr1G012280	undescribed protein	1H	30817677	30819011	-	No	LC_u	-	-
QFD.73xC.1.1	HORVU1Hr1G012290	SWIM zinc finger family protein	1H	30835492	30837420	-	No	HC_TE?	-	-
QFD.73xC.1.1	HORVU1Hr1G012300	ubiquitin-protein ligase 4	1H	30847552	30852623	+	No	HC_G	IPR000569,IPR011989,IPR016024	GO:0004842,GO:0005488
QFD.73xC.1.1	HORVU1Hr1G012310	Tudor/PWWP/MBT superfamily protein	1H	30853195	30854633	-	No	HC_G	-	-
QFD.73xC.1.1	HORVU1Hr1G012320	Tudor/PWWP/MBT superfamily protein	1H	30858766	30859896	-	No	HC_G	-	-
QFD.73xC.1.1	HORVU1Hr1G012330	undescribed protein	1H	30860128	30860684	-	No	HC_G	IPR000313	-
QFD.73xC.1.1	HORVU1Hr1G012340	Chlorophyll synthase, chloroplastic	1H	30972071	30972241	+	No	HC_G	-	-
QFD.73xC.1.1	HORVU1Hr1G012350	undescribed protein	1H	31062452	31063006	-	No	HC_TE?	IPR001810	GO:0005515
QFD.73xC.1.1	HORVU1Hr1G012360	undescribed protein	1H	31162798	31163037	+	No	HC_u	-	-
QFD.73xC.1.1	HORVU1Hr1G012370	Retrotransposon protein, putative, unclassified	1H	31163891	31164809	+	No	LC_TE	-	-
QFD.73xC.1.1	HORVU1Hr1G012380	LRR receptor-like serine/threonine-protein kinase EFR	1H	31165034	31165483	+	No	HC_G	-	-
QFD.73xC.1.1	HORVU1Hr1G012390	Retrotransposon protein, putative, unclassified	1H	31166489	31166917	+	No	LC_TE	-	-
QFD.73xC.1.1	HORVU1Hr1G012400	Retrotransposon protein, putative, unclassified	1H	31167389	31168639	+	No	LC_TE	-	-
QFD.73xC.1.1	HORVU1Hr1G012410	Zinc finger protein 768	1H	31175342	31177158	-	No	LC_TE	IPR007087,IPR013087,IPR015880	GO:0003676,GO:0046872
QFD.73xC.1.1	HORVU1Hr1G012420	GPI-anchor transamidase	1H	31198622	31203284	+	No	HC_G	IPR001096,IPR028361	GO:0016255,GO:0042765,GO:0003923,GO:0006508,GO:0008233
QFD.73xC.1.1	HORVU1Hr1G012430	unknown function	1H	31206764	31209631	-	No	LC_TE	IPR027806	-
QFD.73xC.1.1	HORVU1Hr1G012440	Pentatricopeptide repeat-containing protein	1H	31214977	31217837	+	No	HC_G	IPR002885,IPR011990	GO:0005515
QFD.73xC.1.1	HORVU1Hr1G012450	undescribed protein	1H	31341781	31342193	+	No	LC_u	-	-
QFD.73xC.1.1	HORVU1Hr1G012460	Interactor of constitutive active ROPs 3	1H	31344211	31349062	+	No	HC_G	-	-
QFD.73xC.1.1	HORVU1Hr1G012470	Ribosome biogenesis regulatory protein homolog	1H	31351339	31355135	+	No	HC_G	IPR007023	GO:0005634,GO:0042254
QFD.73xC.1.1	HORVU1Hr1G012480	undescribed protein	1H	31355204	31356529	+	No	LC_u	-	-
QFD.73xC.1.1	HORVU1Hr1G012490	E3 ubiquitin-protein ligase SINA-like 11	1H	31356072	31359183	-	No	HC_G	IPR013083,IPR013323,IPR018121,IPR001841,IPR008974,IPR013010	GO:0006511,GO:0007275,GO:0008270,GO:0016567,GO:0004842,GO:0005515,GO:0005634
QFD.73xC.1.1	HORVU1Hr1G012500	Transposon protein, putative, CACTA, En/Spm sub-class	1H	31382325	31383649	-	No	LC_TE	IPR029480	-
QFD.73xC.1.1	HORVU1Hr1G012510	undescribed protein	1H	31450829	31450936	-	No	LC_TE	IPR009027,IPR011320	-
QFD.73xC.1.1	HORVU1Hr1G012520	Endoglucanase	1H	31504096	31504933	+	No	HC_G	IPR012445	-
QFD.73xC.1.1	HORVU1Hr1G012530	-	1H	31523376	31523395	.	No	-	-	-
QFD.73xC.1.1	HORVU1Hr1G012540	unknown function	1H	31528616	31529170	+	No	LC_TE	IPR025314	-
QFD.73xC.1.1	HORVU1Hr1G012550	RNA-directed DNA polymerase (reverse transcriptase)-related family protein	1H	31544567	31544914	-	No	LC_TE	IPR026960	-
QFD.73xC.1.1	HORVU1Hr1G012560	unknown function	1H	31560185	31560892	-	No	LC_TE	IPR026960	-
QFD.73xC.1.1	HORVU1Hr1G012570	Retrotransposon protein, putative, unclassified	1H	31561146	31561346	-	No	LC_TE	-	-
QFD.73xC.1.1	HORVU1Hr1G012580	Retrotransposon protein, putative, unclassified	1H	31571097	31571345	-	No	LC_TE	-	-
QFD.73xC.1.1	HORVU1Hr1G012590	Retrotransposon protein, putative, LINE subclass	1H	31594349	31594588	+	No	LC_TE	IPR026960	-
QFD.73xC.1.1	HORVU1Hr1G012600	Magnesium-chelatase subunit ChlH, chloroplastic	1H	31622380	31623341	-	No	HC_G	-	-
QFD.73xC.1.1	HORVU1Hr1G012610	unknown function	1H	31627058	31627992	+	No	HC_U	-	-
QFD.73xC.1.1	HORVU1Hr1G012620	undescribed protein	1H	31630058	31630407	+	No	LC_u	-	-
QFD.73xC.1.1	HORVU1Hr1G012630	undescribed protein	1H	31630641	31631143	-	No	LC_u	-	-
QFD.73xC.1.1	HORVU1Hr1G012640	undescribed protein	1H	31635409	31636696	+	No	LC_u	-	-
QFD.73xC.1.1	HORVU1Hr1G012650	undescribed protein	1H	31639743	31640871	+	No	LC_u	-	-
QFD.73xC.1.1	HORVU1Hr1G012660	unknown function	1H	31644015	31644972	+	No	HC_U	-	-
QFD.73xC.1.1	HORVU1Hr1G012670	Protein FAR1-RELATED SEQUENCE 3	1H	31650118	31650970	+	No	HC_G	-	-
QFD.73xC.1.1	HORVU1Hr1G012680	UDP-Glycosyltransferase superfamily protein	1H	31672910	31677138	+	No	HC_G	IPR002213	GO:0008152,GO:0016758
QFD.73xC.1.1	HORVU1Hr1G012690	Tetraspanin family protein	1H	31684461	31688423	-	No	HC_G	IPR000301,IPR018499	GO:0016021
QFD.73xC.1.1	HORVU1Hr1G012700	Zinc finger MYM-type protein 5	1H	31932220	31932708	-	No	HC_TE?	-	-
QFD.73xC.1.1	HORVU1Hr1G012710	Low temperature-induced protein lt101.2	1H	31944906	31945757	+	No	HC_G	IPR000612	GO:0016021
QFD.73xC.1.1	HORVU1Hr1G012720	LOB domain-containing protein 11	1H	32101798	32102986	+	No	HC_G	IPR004883	-
QFD.73xC.1.1	HORVU1Hr1G012730	4'-phosphopantetheinyl transferase superfamily	1H	32173373	32186590	-	No	HC_G	IPR008278	GO:0000287,GO:0008897
QFD.73xC.1.1	HORVU1Hr1G012740	Threonyl-tRNA synthetase, mitochondrial	1H	32176785	32176985	+	No	HC_G	-	-
QFD.73xC.1.1	HORVU1Hr1G012750	undescribed protein	1H	32177144	32182714	+	No	LC_u	-	-
QFD.73xC.1.1	HORVU1Hr1G012760	C2H2-like zinc finger protein	1H	32229489	32229695	+	No	HC_TE?	IPR007087	GO:0046872
QFD.73xC.1.1	HORVU1Hr1G012770	Endosperm transfer cell specific PR60	1H	32296182	32296349	+	No	HC_G	-	-
QFD.73xC.1.1	HORVU1Hr1G012780	-	1H	32296808	32297356	.	No	-	-	-
QFD.73xC.1.1	HORVU1Hr1G012790	Endosperm transfer cell specific PR60	1H	32301748	32301973	-	No	HC_G	-	-
QFD.73xC.1.1	HORVU1Hr1G012800	Endosperm transfer cell specific PR60	1H	32302698	32302853	-	No	HC_G	-	-
QFD.73xC.1.1	HORVU1Hr1G012810	Cullin-associated NEDD8-dissociated protein 1	1H	32303378	32303979	+	No	HC_G	-	-
QFD.73xC.1.1	HORVU1Hr1G012820	unknown function	1H	32336625	32338632	-	No	LC_TE	IPR029480	-
QFD.73xC.1.1	HORVU1Hr1G012830	Retrotransposon protein, putative, unclassified	1H	32366449	32367457	+	No	LC_TE	IPR007321	-
QFD.73xC.1.1	HORVU1Hr1G012840	Cullin-associated NEDD8-dissociated protein 1	1H	32368123	32368969	-	No	HC_G	-	-
QFD.73xC.1.1	HORVU1Hr1G012850	Bifunctional inhibitor/lipid-transfer protein/seed storage 2S albumin superfamily protein	1H	32369549	32369852	+	No	HC_G	-	-
QFD.73xC.1.1	HORVU1Hr1G012860	undescribed protein	1H	32431062	32431265	-	No	LC_u	-	-
QFD.73xC.1.1	HORVU1Hr1G012870	Endosperm transfer cell specific PR60	1H	32431587	32431886	+	No	HC_G	-	-
QFD.73xC.1.1	HORVU1Hr1G012880	Bifunctional inhibitor/lipid-transfer protein/seed storage 2S albumin superfamily protein	1H	32443702	32444496	+	No	HC_G	IPR016140	-
QFD.73xC.1.1	HORVU1Hr1G012890	Endosperm transfer cell specific PR60	1H	32546726	32547483	-	No	HC_G	-	-
QFD.73xC.1.1	HORVU1Hr1G012900	undescribed protein	1H	32548307	32548753	-	No	LC_u	-	-
QFD.73xC.1.1	HORVU1Hr1G012910	Bifunctional inhibitor/lipid-transfer protein/seed storage 2S albumin superfamily protein	1H	32693316	32694104	+	No	HC_G	-	-
QFD.73xC.1.1	HORVU1Hr1G012920	unknown function	1H	32729602	32730261	+	No	HC_U	-	-
QFD.73xC.1.1	HORVU1Hr1G012930	Bifunctional inhibitor/lipid-transfer protein/seed storage 2S albumin superfamily protein	1H	32966183	32966670	+	No	HC_G	IPR016140	-
QFD.73xC.1.1	HORVU1Hr1G012940	Bifunctional inhibitor/lipid-transfer protein/seed storage 2S albumin superfamily protein	1H	33114312	33114799	-	No	HC_G	IPR016140	-
QFD.73xC.1.1	HORVU1Hr1G012950	Bifunctional inhibitor/lipid-transfer protein/seed storage 2S albumin superfamily protein	1H	33174646	33176438	+	No	HC_G	IPR016140	-
QFD.73xC.1.1	HORVU1Hr1G012960	Bifunctional inhibitor/lipid-transfer protein/seed storage 2S albumin superfamily protein	1H	33342845	33343773	-	No	HC_G	IPR016140	-
QFD.73xC.1.1	HORVU1Hr1G012970	unknown function	1H	33347803	33348213	-	No	LC_U	-	-
QFD.73xC.1.1	HORVU1Hr1G012980	undescribed protein	1H	33391159	33391685	-	No	LC_u	-	-
QFD.73xC.1.1	HORVU1Hr1G012990	Retrotransposon protein, putative, unclassified	1H	33400461	33400688	+	No	LC_TE	IPR005135	-
QFD.73xC.1.1	HORVU1Hr1G013000	Retrotransposon protein, putative, unclassified	1H	33402014	33402253	+	No	LC_TE	IPR000477	-
QFD.73xC.1.1	HORVU1Hr1G013010	unknown function	1H	33402868	33403317	+	No	LC_U	-	-
QFD.73xC.1.1	HORVU1Hr1G013020	Bifunctional inhibitor/lipid-transfer protein/seed storage 2S albumin superfamily protein	1H	33440389	33440894	+	No	HC_G	IPR016140	-
QFD.73xC.1.1	HORVU1Hr1G013030	undescribed protein	1H	33441255	33441660	-	No	LC_u	-	-
QFD.73xC.1.1	HORVU1Hr1G013040	ubiquitin-conjugating enzyme 37	1H	33441856	33445024	+	No	HC_G	IPR000608,IPR016135,IPR023313	-
QFD.73xC.1.1	HORVU1Hr1G013050	Polynucleotidyl transferase, ribonuclease H-like superfamily protein	1H	33459073	33459528	-	No	LC_TE	IPR012337	GO:0003676
QFD.73xC.1.1	HORVU1Hr1G013060	Retrotransposon protein, putative, unclassified	1H	33468145	33468345	+	No	LC_TE	-	-
QFD.73xC.1.1	HORVU1Hr1G013070	Retrotransposon protein, putative, unclassified	1H	33468456	33468689	+	No	LC_TE	IPR005135	-
QFD.73xC.1.1	HORVU1Hr1G013080	Retrotransposon protein, putative, unclassified	1H	33468897	33469412	+	No	LC_TE	-	-
QFD.73xC.1.1	HORVU1Hr1G013090	Retrotransposon protein, putative, unclassified	1H	33469530	33469859	+	No	LC_TE	IPR000477	-
QFD.73xC.1.1	HORVU1Hr1G013100	RNA-directed DNA polymerase (Reverse transcriptase)	1H	33470511	33470783	+	No	LC_TE	-	-
QFD.73xC.1.1	HORVU1Hr1G013110	undescribed protein	1H	33476181	33476692	+	No	LC_u	-	-
QFD.73xC.1.1	HORVU1Hr1G013120	undescribed protein	1H	33479165	33479586	+	No	LC_u	-	-
QFD.73xC.1.1	HORVU1Hr1G013130	undescribed protein	1H	33708276	33711909	+	No	LC_u	-	-
QFD.73xC.1.1	HORVU1Hr1G013140	zinc finger homeodomain 1	1H	33708276	33718079	-	No	HC_G	IPR006456	-
QFD.73xC.1.1	HORVU1Hr1G013150	undescribed protein	1H	33802888	33804472	+	No	LC_u	-	-
QFD.73xC.1.1	HORVU1Hr1G013160	Zim17-type zinc finger protein	1H	33802888	33804923	-	No	HC_TE?	IPR007853	GO:0008270
QFD.73xC.1.1	HORVU1Hr1G013170	undescribed protein	1H	33804951	33805911	+	No	LC_u	-	-
QFD.73xC.1.1	HORVU1Hr1G013180	Ribosomal protein-like	1H	33844239	33845925	-	No	HC_G	-	-
QFD.73xC.1.1	HORVU1Hr1G013190	Glycosyltransferase	1H	33846162	33852446	-	No	HC_G	IPR005027,IPR029044	GO:0015018,GO:0016020
QFD.73xC.1.1	HORVU1Hr1G013200	undescribed protein	1H	34060906	34061148	+	No	LC_TE	IPR001878	GO:0003676,GO:0008270
QFD.73xC.1.1	HORVU1Hr1G013210	IQ-domain 2	1H	34083562	34088731	+	No	HC_G	IPR000048,IPR025064	GO:0005515
QFD.73xC.1.1	HORVU1Hr1G013220	General transcription factor 2-related zinc finger protein	1H	34090233	34091991	-	No	LC_TE	IPR012337,IPR025398	GO:0003676
QFD.73xC.1.1	HORVU1Hr1G013230	undescribed protein	1H	34446156	34447040	-	No	LC_u	-	-
QFD.73xC.1.1	HORVU1Hr1G013240	unknown function	1H	34447748	34455224	-	No	HC_G	IPR002110,IPR020683	GO:0005515
QFD.73xC.1.1	HORVU1Hr1G013250	undescribed protein	1H	34539077	34540727	+	No	LC_u	-	-
QFD.73xC.1.1	HORVU1Hr1G013260	undescribed protein	1H	34539132	34540693	-	No	LC_u	-	-
QFD.73xC.1.1	HORVU1Hr1G013270	unknown protein	1H	34764212	34776082	-	No	HC_G
QFD.73xC.1.1	HORVU1Hr1G013280	unknown function	1H	34770012	34770473	+	No	LC_TE	-	-
QFD.73xC.1.1	HORVU1Hr1G013290	unknown function	1H	34772434	34773192	+	No	LC_TE	IPR013103	-
QFD.73xC.1.1	HORVU1Hr1G013300	Chromosome 3B, genomic scaffold, cultivar Chinese Spring	1H	34860386	34865650	-	No	LC_U	-	-
QFD.73xC.1.1	HORVU1Hr1G013310	unknown function	1H	35161853	35167088	+	No	LC_TE	IPR025312	-
QFD.73xC.1.1	HORVU1Hr1G013320	undescribed protein	1H	35161870	35167078	-	No	LC_u	-	-
QFD.73xC.1.1	HORVU1Hr1G013330	Transposon protein, putative, CACTA, En/Spm sub-class	1H	35177067	35184129	+	No	LC_TE	IPR004242	-
QFD.73xC.1.1	HORVU1Hr1G013340	undescribed protein	1H	35177511	35179213	-	No	LC_u	-	-
QFD.73xC.1.1	HORVU1Hr1G013350	undescribed protein	1H	35184223	35185634	-	No	LC_u	-	-
QFD.73xC.1.1	HORVU1Hr1G013360	Hexosyltransferase	1H	35213246	35218550	-	No	HC_G	-	-
QFD.73xC.1.1	HORVU1Hr1G013370	undescribed protein	1H	35216438	35217133	-	No	LC_u	-	-
QFD.73xC.1.1	HORVU1Hr1G013380	undescribed protein	1H	35217068	35217439	+	No	LC_u	-	-
QFD.73xC.1.1	HORVU1Hr1G013390	undescribed protein	1H	35310487	35311527	-	No	LC_u	-	-
QFD.73xC.1.1	HORVU1Hr1G013400	unknown function	1H	35311865	35312980	+	No	LC_TE	IPR001878	GO:0003676,GO:0008270
QFD.73xC.1.1	HORVU1Hr1G013410	undescribed protein	1H	35342397	35342925	-	No	LC_TE	IPR009027,IPR011320	-
QFD.73xC.1.1	HORVU1Hr1G013420	DNA polymerase delta subunit 4	1H	35348051	35348485	+	No	HC_G	-	-
QFD.73xC.1.1	HORVU1Hr1G013430	undescribed protein	1H	35481344	35481487	+	No	HC_u	-	-
QFD.73xC.1.1	HORVU1Hr1G013440	undescribed protein	1H	35519293	35521236	-	No	HC_u	-	-
QFD.73xC.1.1	HORVU1Hr1G013450	Alpha,alpha-trehalose-phosphate synthase [UDP-forming] 1	1H	35606596	35616067	+	No	HC_G	IPR023214,IPR001830,IPR003337,IPR012766	GO:0003824,GO:0003825,GO:0005992
QFD.73xC.1.1	HORVU1Hr1G013460	Retrotransposon protein, putative, unclassified	1H	35664498	35664662	+	No	LC_TE	-	-
QFD.73xC.1.1	HORVU1Hr1G013470	Delta-aminolevulinic acid dehydratase	1H	35676705	35678280	-	No	HC_G	IPR001731,IPR013785	GO:0046872,GO:0003824,GO:0004655,GO:0033014
QFD.73xC.1.1	HORVU1Hr1G013480	sugar transporter 1	1H	35679610	35683434	-	No	HC_G	IPR020846,IPR003663,IPR005828,IPR005829	GO:0022857,GO:0022891,GO:0055085,GO:0005215,GO:0016020,GO:0016021
QFD.73xC.1.1	HORVU1Hr1G013490	unknown function	1H	35723711	35729110	+	No	HC_U	-	-
QFD.73xC.1.1	HORVU1Hr1G013500	LRR receptor-like serine/threonine-protein kinase EFR	1H	35732091	35732324	+	No	HC_G	IPR025558	-
QFD.73xC.1.1	HORVU1Hr1G013510	unknown function	1H	35910440	35914136	-	No	LC_TE	IPR000477	-
QFD.73xC.1.1	HORVU1Hr1G013520	Pectin lyase-like superfamily protein	1H	35975927	35977108	+	No	HC_G	IPR012334,IPR000743,IPR006626,IPR011050	GO:0004650,GO:0005975
QFD.73xC.1.1	HORVU1Hr1G013530	undescribed protein	1H	35977412	35977659	+	No	LC_u	-	-
QFD.73xC.1.1	HORVU1Hr1G013540	unknown protein	1H	35996406	35997765	-	No	HC_G
QFD.73xC.1.1	HORVU1Hr1G013550	Retrotransposon protein, putative, unclassified	1H	36069547	36069666	-	No	LC_TE	-	-
QFD.73xC.1.1	HORVU1Hr1G013560	undescribed protein	1H	36073128	36078899	-	No	LC_u	-	-
QFD.73xC.1.1	HORVU1Hr1G013570	undescribed protein	1H	36073270	36074655	+	No	LC_u	-	-
QFD.73xC.1.1	HORVU1Hr1G013580	Importin subunit beta-1	1H	36169093	36172878	+	No	HC_G	IPR001494,IPR011989,IPR016024	GO:0005488,GO:0006886,GO:0008536
QFD.73xC.1.1	HORVU1Hr1G013590	RNA-directed DNA polymerase (Reverse transcriptase) domain containing protein	1H	36174631	36175046	+	No	LC_TE	-	-
QFD.73xC.1.1	HORVU1Hr1G013600	E3 SUMO-protein ligase SIZ1	1H	36438691	36461615	+	No	HC_G	IPR011011,IPR013083,IPR019786,IPR019787,IPR001965,IPR003034,IPR004181	GO:0005515,GO:0008270
QFD.73xC.1.1	HORVU1Hr1G013610	undescribed protein	1H	36438758	36439790	-	No	LC_u	-	-
QFD.73xC.1.1	HORVU1Hr1G013620	basic region/leucine zipper transcription factor 16	1H	36444369	36444976	+	No	HC_G	IPR004827	GO:0003700,GO:0006355,GO:0043565
QFD.73xC.1.1	HORVU1Hr1G013630	undescribed protein	1H	36459429	36459687	-	No	LC_u	-	-
QFD.73xC.1.1	HORVU1Hr1G013640	undescribed protein	1H	36462249	36464414	-	No	LC_u	-	-
QFD.73xC.1.1	HORVU1Hr1G013650	unknown function	1H	36471360	36472266	-	No	LC_TE	IPR001584,IPR012337	GO:0003676,GO:0015074
QFD.73xC.1.1	HORVU1Hr1G013660	undescribed protein	1H	36589026	36595249	+	No	HC_u	-	-
QFD.73xC.1.1	HORVU1Hr1G013670	Formin-like protein	1H	36596809	36597501	+	No	HC_G	-	-
QFD.73xC.1.1	HORVU1Hr1G013680	Glutelin type-B 5	1H	36685275	36687374	+	No	HC_G	IPR014710,IPR006044,IPR006045,IPR011051	GO:0045735
QFD.73xC.1.1	HORVU1Hr1G013690	Glutelin type-B 5	1H	36697082	36699176	+	No	HC_G	IPR014710,IPR006044,IPR006045,IPR011051	GO:0045735
QFD.73xC.1.1	HORVU1Hr1G013700	Concanavalin A-like lectin protein kinase family protein	1H	36739109	36743669	-	No	HC_G	IPR001220,IPR013320	GO:0030246
QFD.73xC.1.1	HORVU1Hr1G013710	undescribed protein	1H	36872815	36873500	+	No	LC_u	-	-
QFD.73xC.1.1	HORVU1Hr1G013720	Ras-related protein Rab-5A	1H	36892305	36893819	+	No	HC_G	IPR003579,IPR005225,IPR020849,IPR027417,IPR001806,IPR002041,IPR003578	GO:0006886,GO:0006913,GO:0007165,GO:0007264,GO:0015031,GO:0016020,GO:0003924,GO:0005525,GO:0005622
QFD.73xC.1.1	HORVU1Hr1G013730	Beta-1,3-galactosyltransferase 15	1H	36947715	36953198	-	No	HC_G	IPR001079,IPR002659,IPR013320	GO:0030246,GO:0006486,GO:0008378,GO:0016020
QFD.73xC.1.1	HORVU1Hr1G013740	Dihydrolipoyl dehydrogenase	1H	37114344	37117197	-	No	HC_G	IPR016156,IPR023753,IPR004099,IPR006258,IPR012999	GO:0045454,GO:0050660,GO:0055114,GO:0004148,GO:0016491,GO:0016668
QFD.73xC.1.1	HORVU1Hr1G013750	Beta-1,3-galactosyltransferase 15	1H	37120838	37121403	+	No	HC_G	-	-
QFD.73xC.1.1	HORVU1Hr1G013760	undescribed protein	1H	37121519	37121761	-	No	LC_u	-	-
QFD.73xC.1.1	HORVU1Hr1G013770	undescribed protein	1H	37163177	37164031	+	No	LC_u	-	-
QFD.73xC.1.1	HORVU1Hr1G013780	DNA-directed RNA polymerase subunit 10-like protein	1H	37164281	37167912	-	No	HC_G	IPR023580,IPR000268,IPR009057,IPR020789	GO:0008270,GO:0003677,GO:0003899,GO:0006351
QFD.73xC.1.1	HORVU1Hr1G013790	undescribed protein	1H	37164369	37166501	+	No	LC_u	-	-
QFD.73xC.1.1	HORVU1Hr1G013800	undescribed protein	1H	37165232	37165823	-	No	LC_u	-	-
QFD.73xC.1.1	HORVU1Hr1G013810	Pentatricopeptide repeat-containing protein	1H	37317203	37328219	+	No	HC_G	IPR002885,IPR011990	GO:0005515
QFD.73xC.1.1	HORVU1Hr1G013820	isovaleryl-CoA-dehydrogenase	1H	37374602	37382171	+	No	HC_G	IPR009100,IPR013786,IPR006089,IPR006091,IPR009075	GO:0050660,GO:0055114,GO:0003995,GO:0008152,GO:0016627
QFD.73xC.1.1	HORVU1Hr1G013830	undescribed protein	1H	37376885	37377150	+	No	LC_u	-	-
QFD.73xC.1.1	HORVU1Hr1G013840	Protein kinase superfamily protein	1H	37377521	37382060	-	No	HC_G	IPR011009,IPR013320,IPR017441,IPR000719,IPR002290,IPR008271	GO:0004672,GO:0005524,GO:0006468
QFD.73xC.1.1	HORVU1Hr1G013850	undescribed protein	1H	37383704	37384250	-	No	LC_u	-	-
QFD.73xC.1.1	HORVU1Hr1G013860	undescribed protein	1H	37387121	37388284	+	No	LC_u	-	-
QFD.73xC.1.1	HORVU1Hr1G013870	Peptide-N4-(N-acetyl-beta-glucosaminyl)asparagine amidase A protein	1H	37599000	37601168	+	No	HC_G	IPR021102	-
QFD.73xC.1.1	HORVU1Hr1G013880	unknown function	1H	37601563	37605620	-	No	HC_U	-	-
QFD.73xC.1.1	HORVU1Hr1G013890	unknown function	1H	37610058	37610945	-	No	LC_TE	IPR013103	-
QFD.73xC.1.1	HORVU1Hr1G013900	P-loop containing nucleoside triphosphate hydrolases superfamily protein	1H	37693920	37828128	-	No	HC_G	IPR003593,IPR004504,IPR027417	GO:0003684,GO:0005524,GO:0006281
QFD.73xC.1.1	HORVU1Hr1G013910	undescribed protein	1H	37698422	37698604	-	No	LC_u	-	-
QFD.73xC.1.1	HORVU1Hr1G013920	undescribed protein	1H	37884769	37885133	+	No	LC_u	-	-
QFD.73xC.1.1	HORVU1Hr1G013930	undescribed protein	1H	37885743	37886067	+	No	LC_u	-	-
QFD.73xC.1.1	HORVU1Hr1G013940	undescribed protein	1H	37992714	37993320	-	No	LC_u	-	-
QFD.73xC.1.1	HORVU1Hr1G013950	undescribed protein	1H	37995168	37995495	+	No	HC_u	-	-
QFD.73xC.1.1	HORVU1Hr1G013960	Protein of unknown function (DUF1218)	1H	38085801	38086419	+	No	HC_U	-	-
QFD.73xC.1.1	HORVU1Hr1G013970	3-oxo-5-alpha-steroid 4-dehydrogenase family protein	1H	38111312	38113007	-	No	HC_G	IPR001104	GO:0016627,GO:0005737,GO:0006629,GO:0016021
QFD.73xC.1.1	HORVU1Hr1G013980	NADPH quinone oxidoreductase 1	1H	38205103	38205719	+	No	HC_G	IPR029039	-
QFD.73xC.1.1	HORVU1Hr1G013990	Exosome complex component RRP41 homolog	1H	38319950	38322135	-	No	HC_G	IPR001247,IPR020568,IPR027408	-
QFD.73xC.1.1	HORVU1Hr1G014000	receptor kinase 1	1H	38322311	38323586	+	No	HC_G	IPR008271,IPR011009,IPR013320,IPR017441,IPR000719,IPR001245,IPR002290	GO:0004672,GO:0005524,GO:0006468
QFD.73xC.1.1	HORVU1Hr1G014010	30S ribosomal protein S1	1H	38531416	38549552	+	No	HC_G	IPR011990,IPR012340,IPR022967,IPR003029,IPR003107,IPR008847	GO:0005634,GO:0006396,GO:0006397,GO:0003676,GO:0005515,GO:0005622
QFD.73xC.1.1	HORVU1Hr1G014020	undescribed protein	1H	38555774	38556076	-	No	HC_u	-	-
QFD.73xC.1.1	HORVU1Hr1G014030	Pentatricopeptide repeat-containing protein	1H	38708537	38711824	-	No	HC_G	IPR002885,IPR011990	GO:0005515
QFD.73xC.1.1	HORVU1Hr1G014040	Pentatricopeptide repeat-containing protein	1H	38766512	38770123	+	No	HC_G	IPR002885,IPR011990	GO:0005515
QFD.73xC.1.1	HORVU1Hr1G014050	30S ribosomal protein S12	1H	38810334	38810486	-	No	HC_G	IPR005679,IPR006032,IPR012340	GO:0006412,GO:0015935,GO:0003735,GO:0005622,GO:0005840
QFD.73xC.1.1	HORVU1Hr1G014060	Pentatricopeptide repeat-containing protein	1H	38811073	38815851	+	No	HC_G	IPR002885,IPR011990	GO:0005515
QFD.73xC.1.1	HORVU1Hr1G014070	Tetraspanin family protein	1H	38816404	38821620	+	No	HC_G	IPR018499	GO:0016021
QFD.73xC.1.1	HORVU1Hr1G014080	unknown function	1H	38821792	38824474	-	No	HC_U	-	-
QFD.73xC.1.1	HORVU1Hr1G014090	undescribed protein	1H	38932055	38932874	+	No	LC_u	-	-
QFD.73xC.1.1	HORVU1Hr1G014100	undescribed protein	1H	38933062	38933755	-	No	LC_u	-	-
QFD.73xC.1.1	HORVU1Hr1G014110	Retrotransposon protein, putative, unclassified	1H	39001562	39014285	-	No	LC_TE	IPR000477	-
QFD.73xC.1.1	HORVU1Hr1G014120	Nuclear receptor corepressor 1	1H	39011650	39025960	+	No	HC_G	IPR001005,IPR009057,IPR017884	GO:0003677
QFD.73xC.1.1	HORVU1Hr1G014130	undescribed protein	1H	39024113	39025987	-	No	LC_u	-	-
QFD.73xC.1.1	HORVU1Hr1G014140	unknown protein	1H	39127018	39129044	-	No	HC_U
QFD.73xC.1.1	HORVU1Hr1G014150	glycosyl hydrolase family protein 43	1H	39287461	39288805	-	No	HC_G	-	-
QFD.73xC.1.1	HORVU1Hr1G014160	unknown function	1H	39310147	39319829	+	No	LC_U	-	-
QFD.73xC.1.1	HORVU1Hr1G014170	undescribed protein	1H	39310738	39319829	-	No	LC_u	-	-
QFD.73xC.1.1	HORVU1Hr1G014180	undescribed protein	1H	39320237	39321204	+	No	LC_u	-	-
QFD.73xC.1.1	HORVU1Hr1G014190	undescribed protein	1H	39322038	39323147	-	No	LC_u	-	-
QFD.73xC.1.1	HORVU1Hr1G014200	undescribed protein	1H	39339230	39340124	-	No	HC_G	IPR002579,IPR011057	GO:0033743,GO:0055114
QFD.73xC.1.1	HORVU1Hr1G014210	Retrotransposon protein, putative, unclassified	1H	39437675	39439904	-	No	LC_TE	IPR000477	-
QFD.73xC.1.1	HORVU1Hr1G014220	unknown function	1H	39440156	39441587	-	No	LC_TE	IPR005135	-
QFD.73xC.1.1	HORVU1Hr1G014230	glycosyl hydrolase family protein 43	1H	39441720	39443111	+	No	HC_G	IPR006710,IPR023296	GO:0004553,GO:0005975
QFD.73xC.1.1	HORVU1Hr1G014240	undescribed protein	1H	39444428	39456095	+	No	LC_u	-	-
QFD.73xC.1.1	HORVU1Hr1G014250	undescribed protein	1H	39445621	39446201	-	No	LC_u	-	-
QFD.73xC.1.1	HORVU1Hr1G014260	undescribed protein	1H	39450313	39450860	+	No	LC_u	-	-
QFD.73xC.1.1	HORVU1Hr1G014270	Disease resistance protein RGA2	1H	39452088	39452895	-	No	HC_G	-	-
QFD.73xC.1.1	HORVU1Hr1G014280	unknown protein	1H	39612399	39613099	-	No	HC_U
QFD.73xC.1.1	HORVU1Hr1G014290	undescribed protein	1H	39615755	39618173	+	No	LC_u	-	-
QFD.73xC.1.1	HORVU1Hr1G014300	HAT family dimerisation domain containing protein, expressed	1H	39621126	39621409	-	No	LC_TE	IPR008906	GO:0046983
QFD.73xC.1.1	HORVU1Hr1G014310	undescribed protein	1H	39622911	39623661	+	No	LC_u	-	-
QFD.73xC.1.1	HORVU1Hr1G014320	undescribed protein	1H	39629182	39629289	-	No	LC_TE	IPR009027,IPR011320	-
QFD.73xC.1.1	HORVU1Hr1G014330	undescribed protein	1H	39639934	39640339	-	No	LC_u	-	-
QFD.73xC.1.1	HORVU1Hr1G014340	unknown function	1H	39719376	39719792	+	No	LC_U	-	-
QFD.73xC.1.1	HORVU1Hr1G014350	unknown function	1H	39720831	39720998	+	No	LC_U	-	-
QFD.73xC.1.1	HORVU1Hr1G014360	unknown function	1H	39721937	39727268	+	No	LC_TE	IPR004252	-
QFD.73xC.1.1	HORVU1Hr1G014370	undescribed protein	1H	39909840	39914357	-	No	HC_u	-	-
QFD.73xC.1.1	HORVU1Hr1G014380	undescribed protein	1H	39910018	39913914	+	No	LC_u	-	-
QFD.73xC.1.1	HORVU1Hr1G014390	undescribed protein	1H	39915659	39916078	+	No	LC_u	-	-
QFD.73xC.1.1	HORVU1Hr1G014400	undescribed protein	1H	39915681	39917437	-	No	LC_u	-	-
QFD.73xC.1.1	HORVU1Hr1G014410	CBS domain-containing protein, putative, expressed	1H	40004313	40004791	-	No	HC_G	-	-
QFD.73xC.1.1	HORVU1Hr1G014420	undescribed protein	1H	40031428	40031998	-	No	LC_u	-	-
QFD.73xC.1.1	HORVU1Hr1G014430	undescribed protein	1H	40033273	40035330	+	No	LC_u	-	-
QFD.73xC.1.1	HORVU1Hr1G014440	undescribed protein	1H	40034076	40035850	-	No	LC_u	-	-
QFD.73xC.1.1	HORVU1Hr1G014450	undescribed protein	1H	40036156	40037265	-	No	LC_u	-	-
QFD.73xC.1.1	HORVU1Hr1G014460	undescribed protein	1H	40036163	40037086	+	No	LC_u	-	-
QFD.73xC.1.1	HORVU1Hr1G014470	Protein SRG1	1H	40042726	40043439	-	No	LC_TE?	-	-
QFD.73xC.1.1	HORVU1Hr1G014480	undescribed protein	1H	40043748	40044401	-	No	LC_u	-	-
QFD.73xC.1.1	HORVU1Hr1G014490	undescribed protein	1H	40044563	40045376	+	No	LC_u	-	-
QFD.73xC.1.1	HORVU1Hr1G014500	undescribed protein	1H	40061269	40105513	-	No	LC_u	-	-
QFD.73xC.1.1	HORVU1Hr1G014510	undescribed protein	1H	40061383	40064294	+	No	LC_u	-	-
QFD.73xC.1.1	HORVU1Hr1G014520	undescribed protein	1H	40093296	40093731	-	No	LC_u	-	-
QFD.73xC.1.1	HORVU1Hr1G014530	undescribed protein	1H	40115218	40115448	-	No	LC_u	-	-
QFD.73xC.1.1	HORVU1Hr1G014540	undescribed protein	1H	40145329	40146176	-	No	LC_u	-	-
QFD.73xC.1.1	HORVU1Hr1G014550	undescribed protein	1H	40155616	40156480	-	No	LC_u	-	-
QFD.73xC.1.1	HORVU1Hr1G014560	E3 ubiquitin-protein ligase SIS3	1H	40357118	40358367	-	No	HC_G	-	-
QFD.73xC.1.1	HORVU1Hr1G014570	Phosphoinositide phospholipase C 2	1H	40389508	40406729	-	No	HC_G	IPR001711,IPR017946,IPR000008,IPR000909,IPR001192	GO:0007165,GO:0008081,GO:0035556,GO:0004435,GO:0005515,GO:0006629
QFD.73xC.1.1	HORVU1Hr1G014580	Phosphoinositide phospholipase C 2	1H	40451937	40459909	+	No	HC_G	IPR001711,IPR011992,IPR015359,IPR017946,IPR000008,IPR000909,IPR001192	GO:0007165,GO:0008081,GO:0035556,GO:0004435,GO:0005515,GO:0006629
QFD.73xC.1.1	HORVU1Hr1G014590	Galactosyl transferase GMA12/MNN10 family protein	1H	40474878	40476428	-	No	HC_G	IPR008630	GO:0016021,GO:0016757
QFD.73xC.1.1	HORVU1Hr1G014600	undescribed protein	1H	40477331	40478773	-	No	LC_u	-	-
QFD.73xC.1.1	HORVU1Hr1G014610	ADP-ribosylation factor 1	1H	40513042	40543033	-	No	HC_G	IPR024156,IPR027417,IPR003579,IPR005225,IPR006689	GO:0015031,GO:0005525,GO:0005622,GO:0007264
QFD.73xC.1.1	HORVU1Hr1G014620	unknown function	1H	40770419	40772559	+	No	LC_U	-	-
QFD.73xC.1.1	HORVU1Hr1G014630	unknown function	1H	40772829	40773670	+	No	HC_U	-	-
QFD.73xC.1.1	HORVU1Hr1G014640	unknown function	1H	40773731	40774574	-	No	HC_U	-	-
QFD.73xC.1.1	HORVU1Hr1G014650	unknown function	1H	40776037	40777501	-	No	LC_U	-	-
QFD.73xC.1.1	HORVU1Hr1G014660	undescribed protein	1H	40817731	40817871	-	No	LC_u	-	-
QFD.73xC.1.1	HORVU1Hr1G014670	Retrotransposon protein, putative, unclassified, expressed	1H	40822361	40822621	-	No	LC_TE	-	-
QFD.73xC.1.1	HORVU1Hr1G014680	unknown function	1H	40841866	40843375	+	No	LC_U	-	-
QFD.73xC.1.1	HORVU1Hr1G014690	FAR1-related sequence 5	1H	40984547	40986802	+	No	HC_TE?	IPR006564,IPR007527,IPR018289	GO:0008270
QFD.73xC.1.1	HORVU1Hr1G014700	undescribed protein	1H	41005783	41007234	+	No	HC_u	-	-
QFD.73xC.1.1	HORVU1Hr1G014710	Dolichyl-diphosphooligosaccharide--protein glycosyltransferase subunit 4A	1H	41010020	41012215	-	No	HC_G	IPR018943	-
QFD.73xC.1.1	HORVU1Hr1G014720	Zinc finger CCCH domain-containing protein 33	1H	41056299	41057523	-	No	LC_TE?	IPR000571	GO:0046872
QFD.73xC.1.1	HORVU1Hr1G014730	Zinc finger CCCH domain-containing protein 33	1H	41056598	41082430	+	No	HC_TE?	IPR000571,IPR002110,IPR020683	GO:0005515,GO:0046872
QFD.73xC.1.1	HORVU1Hr1G014740	undescribed protein	1H	41079001	41079441	-	No	LC_u	-	-
QFD.73xC.1.1	HORVU1Hr1G014750	undescribed protein	1H	41083322	41087051	-	No	LC_u	-	-
QFD.73xC.1.1	HORVU1Hr1G014760	undescribed protein	1H	41083922	41085139	+	No	LC_u	-	-
QFD.73xC.1.1	HORVU1Hr1G014770	undescribed protein	1H	41087201	41087909	-	No	LC_u	-	-
QFD.73xC.1.1	HORVU1Hr1G014780	undescribed protein	1H	41088451	41089393	-	No	LC_u	-	-
QFD.73xC.1.1	HORVU1Hr1G014790	undescribed protein	1H	41089513	41090266	+	No	LC_TE?	IPR025836	-
QFD.73xC.1.1	HORVU1Hr1G014800	RRP15-like protein	1H	41229756	41235195	+	No	HC_G	IPR012459	-
QFD.73xC.1.1	HORVU1Hr1G014810	undescribed protein	1H	41365566	41366240	-	No	LC_u	-	-
QFD.73xC.1.1	HORVU1Hr1G014820	undescribed protein	1H	41366653	41366962	+	No	LC_u	-	-
QFD.73xC.1.1	HORVU1Hr1G014830	Retrotransposon protein, putative, unclassified	1H	41415892	41416089	-	No	LC_TE	-	-
QFD.73xC.1.1	HORVU1Hr1G014840	undescribed protein	1H	41440986	41445293	+	No	LC_u	-	-
QFD.73xC.1.1	HORVU1Hr1G014850	undescribed protein	1H	41441019	41444716	-	No	LC_u	-	-
QFD.73xC.1.1	HORVU1Hr1G014860	Retrotransposon protein, putative, unclassified	1H	41513141	41513446	-	No	LC_TE	-	-
QFD.73xC.1.1	HORVU1Hr1G014870	Retrotransposon protein, putative, unclassified	1H	41516032	41517268	-	No	LC_TE	IPR013242,IPR021109	-
QFD.73xC.1.1	HORVU1Hr1G014880	unknown function	1H	41518628	41520307	+	No	HC_G	IPR032675	-
QFD.73xC.1.1	HORVU1Hr1G014890	Craniofacial development protein 2	1H	41527813	41528125	-	No	LC_TE?	IPR005135	-
QFD.73xC.1.1	HORVU1Hr1G014900	unknown function	1H	41674511	41679758	+	No	LC_TE	IPR004332	-
QFD.73xC.1.1	HORVU1Hr1G014910	Tunicamycin induced 1	1H	41677825	41678772	-	No	HC_G	-	-
QFD.73xC.1.1	HORVU1Hr1G014920	undescribed protein	1H	41753119	41753489	+	No	LC_u	-	-
QFD.73xC.1.1	HORVU1Hr1G014930	undescribed protein	1H	41824117	41827647	+	No	LC_u	-	-
QFD.73xC.1.1	HORVU1Hr1G014940	undescribed protein	1H	41824117	41827647	-	No	LC_u	-	-
QFD.73xC.1.1	HORVU1Hr1G014950	Trihelix transcription factor GT-3a	1H	41849813	41851378	+	No	HC_G	IPR017877	-
QFD.73xC.1.1	HORVU1Hr1G014960	undescribed protein	1H	41850834	41851378	-	No	LC_u	-	-
QFD.73xC.1.1	HORVU1Hr1G014970	undescribed protein	1H	41851668	41854031	+	No	LC_u	-	-
QFD.73xC.1.1	HORVU1Hr1G014980	undescribed protein	1H	41863594	41864446	-	No	LC_u	-	-
QFD.73xC.1.1	HORVU1Hr1G014990	undescribed protein	1H	41863988	41864642	+	No	HC_u	-	-
QFD.73xC.1.1	HORVU1Hr1G015000	unknown function	1H	41877286	41878345	+	No	HC_U	-	-
QFD.73xC.1.1	HORVU1Hr1G015010	undescribed protein	1H	41892438	41892654	+	No	LC_u	-	-
QFD.73xC.1.1	HORVU1Hr1G015020	undescribed protein	1H	41892792	41903165	+	No	LC_u	-	-
QFD.73xC.1.1	HORVU1Hr1G015030	-	1H	42186751	42186900	.	No	-	-	-
QFD.73xC.1.1	HORVU1Hr1G015040	Chaperone protein dnaJ 2	1H	42490639	42497130	+	No	HC_G	IPR002939,IPR008971	GO:0006457,GO:0051082
QFD.73xC.1.1	HORVU1Hr1G015050	Protein kinase superfamily protein	1H	42497000	42503605	-	No	HC_G	IPR032675	-
QFD.73xC.1.1	HORVU1Hr1G015060	Chaperone protein DnaJ	1H	42739685	42767912	+	No	HC_G	IPR001623,IPR018253	-
QFD.73xC.1.1	HORVU1Hr1G015070	undescribed protein	1H	42748762	42749288	-	No	LC_u	-	-
QFD.73xC.1.1	HORVU1Hr1G015080	undescribed protein	1H	42749615	42750559	+	No	LC_u	-	-
QFD.73xC.1.1	HORVU1Hr1G015090	tyrosine aminotransferase 3	1H	43087960	43089697	+	No	HC_G	IPR015421,IPR015422,IPR015424,IPR004838,IPR004839,IPR005958	GO:0009058,GO:0030170,GO:0003824,GO:0006520,GO:0008483
QFD.73xC.1.1	HORVU1Hr1G015100	unknown function	1H	43178256	43179435	-	No	LC_U	-	-
QFD.73xC.1.1	HORVU1Hr1G015110	Retrotransposon protein, putative, unclassified	1H	43181549	43183003	+	No	LC_TE	IPR005135	-
QFD.73xC.1.1	HORVU1Hr1G015120	undescribed protein	1H	43318746	43319923	-	No	LC_u	-	-
QFD.73xC.1.1	HORVU1Hr1G015130	Beta-glucosidase C	1H	43536504	43551808	+	No	HC_G	IPR001764,IPR002772,IPR017853	GO:0004553,GO:0005975
QFD.73xC.1.1	HORVU1Hr1G015140	Myosin-J heavy chain	1H	43539576	43540788	-	No	HC_TE?	IPR026960	-
QFD.73xC.1.1	HORVU1Hr1G015150	undescribed protein	1H	43540693	43541647	+	No	LC_u	-	-
QFD.73xC.1.1	HORVU1Hr1G015160	unknown function	1H	43540972	43549102	-	No	LC_TE	IPR000477	-
QFD.73xC.1.1	HORVU1Hr1G015170	Retrotransposon protein, putative, unclassified	1H	43549130	43550584	-	No	LC_TE	IPR005135	-
QFD.73xC.1.1	HORVU1Hr1G015180	Helicase-like protein	1H	43552431	43553877	+	No	HC_TE?	-	-
QFD.73xC.1.1	HORVU1Hr1G015190	Jasmonate-induced protein	1H	43686713	43688076	+	No	HC_G	IPR001229,IPR004265	-
QFD.73xC.1.1	HORVU1Hr1G015200	undescribed protein	1H	43747589	43748086	-	No	LC_u	-	-
QFD.73xC.1.1	HORVU1Hr1G015210	Leucine-rich repeat receptor-like protein kinase family protein	1H	43791969	43795909	-	No	HC_G	IPR008266,IPR011009,IPR013210,IPR013320,IPR017441,IPR032675,IPR000719,IPR001611,IPR003591	GO:0006468,GO:0004672,GO:0005515,GO:0005524
QFD.73xC.1.1	HORVU1Hr1G015220	Retrotransposon protein, putative, unclassified	1H	43796464	43797313	-	No	LC_TE	-	-
QFD.73xC.1.1	HORVU1Hr1G015230	unknown protein	1H	43803664	43804404	-	No	LC_TE
QFD.73xC.1.1	HORVU1Hr1G015240	Regulator of chromosome condensation (RCC1) family protein	1H	44073265	44074055	-	No	HC_G	IPR000408,IPR009091	-
QFD.73xC.1.1	HORVU1Hr1G015250	undescribed protein	1H	44076143	44076570	+	No	LC_u	-	-
QFD.73xC.1.1	HORVU1Hr1G015260	Protein of unknown function, DUF547	1H	44093452	44096983	-	No	HC_U	IPR006869,IPR025757	-
QFD.73xC.1.1	HORVU1Hr1G015270	Protein RCC2 homolog	1H	44209940	44216086	-	No	HC_G	IPR000408,IPR009091,IPR020478	-
QFD.73xC.1.1	HORVU1Hr1G015280	undescribed protein	1H	44230081	44230649	+	No	LC_u	-	-
QFD.73xC.1.1	HORVU1Hr1G015290	unknown function	1H	44250729	44254449	-	No	LC_TE	IPR013103	-
QFD.73xC.1.1	HORVU1Hr1G015300	undescribed protein	1H	44274377	44275272	-	No	HC_u	-	-
QFD.73xC.1.1	HORVU1Hr1G015310	ATP-dependent zinc metalloprotease FtsH	1H	44674661	44683716	+	No	HC_G	IPR027417,IPR003593,IPR003959,IPR003960	GO:0005524
QFD.73xC.1.1	HORVU1Hr1G015320	undescribed protein	1H	44674998	44675421	+	No	LC_u	-	-
QFD.73xC.1.1	HORVU1Hr1G015330	Retrotransposon protein, putative, Ty1-copia subclass	1H	44684309	44684749	-	No	LC_TE	-	-
QFD.73xC.1.1	HORVU1Hr1G015340	Retrotransposon protein, putative, Ty1-copia subclass	1H	44760379	44760657	+	No	LC_TE	-	-
QFD.73xC.1.1	HORVU1Hr1G015350	Protein of unknown function (DUF1068)	1H	44951811	44952627	-	No	HC_U	IPR010471	-
QFD.73xC.1.1	HORVU1Hr1G015360	unknown function	1H	44958631	44958978	-	No	LC_TE	IPR025312	-
QFD.73xC.1.1	HORVU1Hr1G015370	unknown function	1H	44959910	44960077	-	No	LC_U	-	-
QFD.73xC.1.1	HORVU1Hr1G015380	unknown function	1H	44961121	44961534	-	No	LC_U	-	-
QFD.73xC.1.1	HORVU1Hr1G015390	-	1H	45002641	45008141	+	No	-	-	-
QFD.73xC.1.1	HORVU1Hr1G015400	undescribed protein	1H	45057373	45057844	+	No	LC_u	-	-
QFD.73xC.1.1	HORVU1Hr1G015410	undescribed protein	1H	45196338	45196769	+	No	LC_u	-	-
QFD.73xC.1.1	HORVU1Hr1G015420	receptor kinase 3	1H	45222468	45223908	-	No	HC_G	IPR011009,IPR013320,IPR017441,IPR000719,IPR002290,IPR008271	GO:0004672,GO:0005524,GO:0006468
QFD.73xC.1.1	HORVU1Hr1G015430	Ribosomal protein-like	1H	45226082	45226894	-	No	HC_G	-	-
QFD.73xC.1.1	HORVU1Hr1G015440	undescribed protein	1H	45229201	45231746	+	No	LC_u	-	-
QFD.73xC.1.1	HORVU1Hr1G015450	Transposon protein, putative, CACTA, En/Spm sub-class	1H	45345297	45346904	-	No	LC_TE	IPR025312,IPR025452	-
QFD.73xC.1.1	HORVU1Hr1G015460	undescribed protein	1H	45372047	45372574	+	No	LC_u	-	-
QFD.73xC.1.1	HORVU1Hr1G015470	Transposon protein, putative, CACTA, En/Spm sub-class	1H	45391074	45406674	-	No	LC_TE	IPR004242,IPR025312,IPR025452	-
QFD.73xC.1.1	HORVU1Hr1G015480	undescribed protein	1H	45500765	45501555	-	No	LC_u	-	-
QFD.73xC.1.1	HORVU1Hr1G015490	carotenoid isomerase	1H	45619173	45625077	-	No	HC_G	IPR002937,IPR014101,IPR023753	GO:0055114,GO:0016117,GO:0016491,GO:0016853
QFD.73xC.1.1	HORVU1Hr1G015500	Zinc transporter 2	1H	45664967	45669570	-	No	HC_G	IPR002524,IPR027469	GO:0055085,GO:0006812,GO:0008324,GO:0016021
QFD.73xC.1.1	HORVU1Hr1G015510	undescribed protein	1H	46099861	46101299	+	No	LC_u	-	-
QFD.73xC.1.1	HORVU1Hr1G015520	undescribed protein	1H	46100620	46102443	-	No	LC_u	-	-
QFD.73xC.1.1	HORVU1Hr1G015530	AP-3 complex subunit mu-1	1H	46106665	46107034	+	No	LC_TE?	IPR009027,IPR011320	-
QFD.73xC.1.1	HORVU1Hr1G015540	undescribed protein	1H	46149523	46149795	-	No	HC_u	-	-
QFD.73xC.1.1	HORVU1Hr1G015550	Endoglucanase 14	1H	46499550	46503152	+	No	HC_G	IPR018221,IPR001701,IPR008928,IPR012341	GO:0003824,GO:0004553,GO:0005975
QFD.73xC.1.1	HORVU1Hr1G015560	Acetylornithine aminotransferase	1H	46501536	46504543	-	No	HC_G	IPR015422,IPR015424,IPR004636,IPR005814,IPR015421	GO:0030170,GO:0003824,GO:0006525,GO:0008483
QFD.73xC.1.1	HORVU1Hr1G015570	undescribed protein	1H	46533034	46533331	+	No	LC_u	-	-
QFD.73xC.1.1	HORVU1Hr1G015580	unknown function	1H	46535301	46535909	+	No	HC_U	-	-
QFD.73xC.1.1	HORVU1Hr1G015590	Glutamate--cysteine ligase B, chloroplastic	1H	46538509	46544521	-	No	HC_G	IPR006336,IPR011556	GO:0004357,GO:0006750,GO:0042398
QFD.73xC.1.1	HORVU1Hr1G015600	undescribed protein	1H	46650323	46651751	-	No	LC_u	-	-
QFD.73xC.1.1	HORVU1Hr1G015610	Peroxisomal multifunctional enzyme type 2	1H	46653317	46653886	-	No	HC_G	IPR003033	-
QFD.73xC.1.1	HORVU1Hr1G015620	non-specific phospholipase C1	1H	46657594	46658954	+	No	HC_G	-	-
QFD.73xC.1.1	HORVU1Hr1G015630	-	1H	46657615	46658076	-	No	-	-	-
QFD.73xC.1.1	HORVU1Hr1G015640	undescribed protein	1H	46664802	46665341	-	No	LC_u	-	-
QFD.73xC.1.1	HORVU1Hr1G015650	AP-3 complex subunit mu-1	1H	46809516	46809653	-	No	LC_TE?	IPR009027,IPR011320	-
QFD.73xC.1.1	HORVU1Hr1G015660	bZIP transcription factor 53	1H	47002240	47004177	-	No	HC_G	IPR004827	GO:0003700,GO:0006355,GO:0043565
QFD.73xC.1.1	HORVU1Hr1G015670	Peptidyl-prolyl cis-trans isomerase-like 4	1H	47243950	47247063	-	No	HC_G	IPR002130,IPR029000	GO:0000413,GO:0003755,GO:0006457
QFD.73xC.1.1	HORVU1Hr1G015680	-	1H	47249775	47249933	.	No	-	-	-
QFD.73xC.1.1	HORVU1Hr1G015690	Proteasome subunit alpha type-7-A	1H	47266752	47267727	+	No	HC_G	-	-
QFD.73xC.1.1	HORVU1Hr1G015700	undescribed protein	1H	47267873	47268625	-	No	LC_u	-	-
QFD.73xC.1.1	HORVU1Hr1G015710	BTB/POZ domain-containing protein	1H	47347148	47348381	-	No	HC_G	IPR000210,IPR008974,IPR011333	GO:0005515
QFD.73xC.1.1	HORVU1Hr1G015720	Homeobox protein knotted-1-like 1	1H	47369547	47376303	-	No	HC_G	IPR005540,IPR005541	GO:0003677,GO:0005634
QFD.73xC.1.1	HORVU1Hr1G015730	undescribed protein	1H	47738066	47738279	-	No	LC_u	-	-
QFD.73xC.1.1	HORVU1Hr1G015740	unknown function	1H	47968630	47969226	+	No	LC_TE	IPR027806	-
QFD.73xC.1.1	HORVU1Hr1G015750	Chromosome 3B, genomic scaffold, cultivar Chinese Spring	1H	48047373	48048061	-	No	HC_U	-	-
QFD.73xC.1.1	HORVU1Hr1G015760	undescribed protein	1H	48106355	48107026	-	No	LC_u	-	-
QFD.73xC.1.1	HORVU1Hr1G015770	receptor kinase 2	1H	48204972	48208175	+	No	HC_G	IPR008271,IPR011009,IPR013320,IPR017441,IPR000719,IPR001245,IPR002290	GO:0004672,GO:0005524,GO:0006468
QFD.73xC.1.1	HORVU1Hr1G015780	hAT dimerisation domain-containing protein	1H	48209097	48211062	+	No	LC_TE	IPR008906,IPR012337	GO:0003676,GO:0046983
QFD.73xC.1.1	HORVU1Hr1G015790	undescribed protein	1H	48223017	48224509	-	No	LC_u	-	-
QFD.73xC.1.1	HORVU1Hr1G015800	undescribed protein	1H	48257120	48257517	-	No	LC_u	-	-
QFD.73xC.1.1	HORVU1Hr1G015810	Leucine-rich repeat receptor-like protein kinase family protein	1H	48267027	48270561	-	No	HC_G	IPR032675,IPR001611,IPR003591,IPR013210	GO:0005515
QFD.73xC.1.1	HORVU1Hr1G015820	unknown function	1H	48461179	48465102	+	No	HC_G	IPR032675	-
QFD.73xC.1.1	HORVU1Hr1G015830	undescribed protein	1H	48462872	48465018	-	No	LC_u	-	-
QFD.73xC.1.1	HORVU1Hr1G015840	unknown function	1H	48503863	48504380	-	No	HC_U	-	-
QFD.73xC.1.1	HORVU1Hr1G015850	undescribed protein	1H	48586026	48586417	-	No	HC_u	-	-
QFD.73xC.1.1	HORVU1Hr1G015860	Retrotransposon protein, putative, unclassified	1H	48588199	48589053	-	No	LC_TE	IPR026960	-
QFD.73xC.1.1	HORVU1Hr1G015870	unknown function	1H	48594513	48595016	+	No	HC_U	-	-
QFD.73xC.1.1	HORVU1Hr1G015880	undescribed protein	1H	48613390	48614619	-	No	LC_u	-	-
QFD.73xC.1.1	HORVU1Hr1G015890	Plant protein of unknown function (DUF247)	1H	48783356	48785059	+	No	HC_U	IPR004158	-
QFD.73xC.1.1	HORVU1Hr1G015900	undescribed protein	1H	48857035	48857917	+	No	LC_u	-	-
QFD.73xC.1.1	HORVU1Hr1G015910	Protein BIG GRAIN 1-like	1H	48877754	48879054	-	No	HC_G	-	-
QFD.73xC.1.1	HORVU1Hr1G015920	annexin 5	1H	48883886	48884842	-	No	HC_G	IPR001464,IPR018502	GO:0005509,GO:0005544
QFD.73xC.1.1	HORVU1Hr1G015930	HAT family dimerisation domain containing protein	1H	48892404	48892829	-	No	LC_TE	IPR008906,IPR012337	GO:0003676,GO:0046983
QFD.73xC.1.1	HORVU1Hr1G015940	Beta-carotene isomerase D27, chloroplastic	1H	48897327	48900352	+	No	HC_G	IPR025114	-
QFD.73xC.1.1	HORVU1Hr1G015950	undescribed protein	1H	48897764	48898036	-	No	LC_u	-	-
QFD.73xC.1.1	HORVU1Hr1G015960	undescribed protein	1H	48916455	48917699	-	No	LC_u	-	-
QFD.73xC.1.1	HORVU1Hr1G015970	undescribed protein	1H	48957402	48957761	+	No	HC_TE?	IPR001878	GO:0003676,GO:0008270
QFD.73xC.1.1	HORVU1Hr1G015980	unknown function	1H	48957831	48958504	+	No	HC_U	-	-
QFD.73xC.1.1	HORVU1Hr1G015990	Retrotransposon protein, putative, unclassified	1H	48959946	48962315	+	No	LC_TE	-	-
QFD.73xC.1.1	HORVU1Hr1G016000	unknown function	1H	48962346	48962761	+	No	HC_U	-	-
QFD.73xC.1.1	HORVU1Hr1G016010	unknown function	1H	48963072	48963455	+	No	LC_TE	IPR026960	-
QFD.73xC.1.1	HORVU1Hr1G016020	Retrotransposon protein, putative, unclassified	1H	48970103	48970915	+	No	LC_TE	IPR001584,IPR012337	GO:0003676,GO:0015074
QFD.73xC.1.1	HORVU1Hr1G016030	F-box family protein	1H	48979059	48980839	+	No	HC_TE?	IPR001810	GO:0005515
QFD.73xC.1.1	HORVU1Hr1G016040	undescribed protein	1H	49151521	49151938	-	No	LC_u	-	-
QFD.73xC.1.1	HORVU1Hr1G016050	Methionine aminopeptidase 2	1H	49151993	49154182	+	No	HC_G	-	-
QFD.73xC.1.1	HORVU1Hr1G016060	Pentatricopeptide repeat-containing protein	1H	49152013	49154182	-	No	HC_G	-	-
QFD.73xC.1.1	HORVU1Hr1G016070	undescribed protein	1H	49189889	49190599	-	No	LC_u	-	-
QFD.73xC.1.1	HORVU1Hr1G016080	annexin 5	1H	49254623	49256601	+	No	HC_G	IPR001464,IPR018252,IPR018502	GO:0005509,GO:0005544
QFD.73xC.1.1	HORVU1Hr1G016090	undescribed protein	1H	49708769	49709044	-	No	LC_u	-	-
QFD.73xC.1.1	HORVU1Hr1G016100	undescribed protein	1H	49759341	49759584	+	No	LC_u	-	-
QFD.73xC.1.1	HORVU1Hr1G016110	Exostosin family protein	1H	49766616	49769941	-	No	HC_G	IPR004263	-
QFD.73xC.1.1	HORVU1Hr1G016120	G-patch domain containing protein	1H	49789134	49789446	+	No	HC_G	-	-
QFD.73xC.1.1	HORVU1Hr1G016130	Zinc finger CCCH-type with G patch domain-containing protein	1H	49789489	49794943	+	No	HC_G	IPR000467	GO:0003676
QFD.73xC.1.1	HORVU1Hr1G016140	undescribed protein	1H	49797840	49799683	-	No	HC_u	-	-
QFD.73xC.1.1	HORVU1Hr1G016150	undescribed protein	1H	49797905	49798988	+	No	LC_u	-	-
QFD.73xC.1.1	HORVU1Hr1G016160	undescribed protein	1H	49799582	49800172	+	No	LC_u	-	-
QFD.73xC.1.1	HORVU1Hr1G016170	unknown function	1H	49947498	49951904	+	No	HC_U	-	-
QFD.73xC.1.1	HORVU1Hr1G016180	undescribed protein	1H	49948591	49948941	-	No	HC_u	-	-
QFD.73xC.1.1	HORVU1Hr1G016190	Pentatricopeptide repeat-containing protein	1H	50043542	50046281	+	No	HC_G	IPR002885,IPR011990	GO:0005515
QFD.73xC.1.1	HORVU1Hr1G016200	Long-chain-fatty-acid--CoA ligase 5	1H	50046025	50054454	-	No	HC_G	IPR000873,IPR020845	GO:0003824,GO:0008152
QFD.73xC.1.1	HORVU1Hr1G016210	undescribed protein	1H	50054862	50056412	-	No	LC_u	-	-
QFD.73xC.1.1	HORVU1Hr1G016220	undescribed protein	1H	50054975	50056764	+	No	LC_u	-	-
QFD.73xC.1.1	HORVU1Hr1G016230	undescribed protein	1H	50056825	50057922	+	No	LC_u	-	-
QFD.73xC.1.1	HORVU1Hr1G016240	agenet domain-containing protein	1H	50159972	50164722	-	No	HC_G	IPR008395,IPR014002	-
QFD.73xC.1.1	HORVU1Hr1G016250	undescribed protein	1H	50161211	50161475	-	No	LC_u	-	-
QFD.73xC.1.1	HORVU1Hr1G016260	unknown function	1H	50345020	50345412	+	No	LC_U	-	-
QFD.73xC.1.1	HORVU1Hr1G016270	Chaperone protein DnaJ	1H	50417531	50419068	+	No	HC_G	IPR001623	-
QFD.73xC.1.1	HORVU1Hr1G016280	unknown function	1H	50763479	50765834	+	No	HC_TE?	IPR001810,IPR032675	GO:0005515
QFD.73xC.1.1	HORVU1Hr1G016290	undescribed protein	1H	50769109	50778176	+	No	LC_u	-	-
QFD.73xC.1.1	HORVU1Hr1G016300	undescribed protein	1H	51019810	51020874	+	No	LC_u	-	-
QFD.73xC.1.1	HORVU1Hr1G016310	undescribed protein	1H	51139236	51139744	-	No	LC_u	-	-
QFD.73xC.1.1	HORVU1Hr1G016320	Formin Homology 14	1H	51255788	51269459	-	No	HC_G	IPR029021,IPR000008,IPR014020,IPR015425	GO:0005515
QFD.73xC.1.1	HORVU1Hr1G016330	-	1H	51454710	51455717	+	No	-	-	-
QFD.73xC.1.1	HORVU1Hr1G016340	Retrotransposon protein, putative, Ty1-copia subclass	1H	51576653	51577222	-	No	LC_TE	-	-
QFD.73xC.1.1	HORVU1Hr1G016350	undescribed protein	1H	51577250	51577528	+	No	LC_u	-	-
QFD.73xC.1.1	HORVU1Hr1G016360	Triose phosphate/phosphate translocator, chloroplastic	1H	51578268	51585374	-	No	HC_G	IPR004696,IPR004853	GO:0005215,GO:0006810,GO:0016021
QFD.73xC.1.1	HORVU1Hr1G016370	O-fucosyltransferase family protein	1H	51594386	51600630	-	No	HC_G	IPR019378	-
QFD.73xC.1.1	HORVU1Hr1G016380	undescribed protein	1H	51610300	51610711	+	No	LC_u	-	-
QFD.73xC.1.1	HORVU1Hr1G016390	Pol polyprotein	1H	51749722	51759816	-	No	LC_TE	IPR000477	-
QFD.73xC.1.1	HORVU1Hr1G016400	Ubiquinol oxidase	1H	51963214	51963840	+	No	HC_G	-	-
QFD.73xC.1.1	HORVU1Hr1G016410	undescribed protein	1H	51980919	51982216	+	No	LC_u	-	-
QFD.73xC.1.1	HORVU1Hr1G016420	myb domain protein 108	1H	52186799	52188501	-	No	HC_G	IPR001005,IPR009057,IPR017930	GO:0003677
QFD.73xC.1.1	HORVU1Hr1G016430	Regulator of chromosome condensation (RCC1) family protein	1H	52356270	52374761	+	No	HC_G	IPR000408,IPR009091	-
QFD.73xC.1.1	HORVU1Hr1G016440	unknown function	1H	52364947	52365370	+	No	LC_U	-	-
QFD.73xC.1.1	HORVU1Hr1G016450	unknown function	1H	52367397	52368470	+	No	LC_TE	IPR005135	-
QFD.73xC.1.1	HORVU1Hr1G016460	unknown function	1H	52368545	52371247	+	No	LC_TE	IPR000477	-
QFD.73xC.1.1	HORVU1Hr1G016470	unknown function	1H	52371289	52371483	+	No	HC_U	-	-
QFD.73xC.1.1	HORVU1Hr1G016480	Nitrogen regulatory protein P-II homolog	1H	52379379	52383241	+	No	HC_G	IPR017918,IPR002187,IPR011322,IPR015867	GO:0006808,GO:0030234
QFD.73xC.1.1	HORVU1Hr1G016490	Protein kinase superfamily protein	1H	52765307	52769854	+	No	HC_G	IPR011009,IPR017441,IPR000719,IPR002290,IPR008271	GO:0004672,GO:0005524,GO:0006468
QFD.73xC.1.1	HORVU1Hr1G016500	GDSL esterase/lipase	1H	52788751	52790200	+	No	HC_G	IPR013830	-
QFD.73xC.1.1	HORVU1Hr1G016510	undescribed protein	1H	52922644	52931676	+	No	LC_u	-	-
QFD.73xC.1.1	HORVU1Hr1G016520	undescribed protein	1H	52922658	52931541	-	No	LC_u	-	-
QFD.73xC.1.1	HORVU1Hr1G016530	undescribed protein	1H	52923716	52925318	+	No	LC_u	-	-
QFD.73xC.1.1	HORVU1Hr1G016540	Ankyrin repeat family protein	1H	53348473	53381551	+	No	HC_G	IPR002110,IPR020683	GO:0005515
QFD.73xC.1.1	HORVU1Hr1G016550	Transposon Ty1-OL Gag-Pol polyprotein	1H	53353583	53354449	-	No	LC_TE	IPR013103	-
QFD.73xC.1.1	HORVU1Hr1G016560	Transposon Ty1-OL Gag-Pol polyprotein	1H	53364023	53367593	-	No	LC_TE	IPR013103	-
QFD.73xC.1.1	HORVU1Hr1G016570	unknown function	1H	53369147	53376091	-	No	LC_TE	IPR000477	-
QFD.73xC.1.1	HORVU1Hr1G016580	undescribed protein	1H	53371701	53377157	+	No	LC_u	-	-
QFD.73xC.1.1	HORVU1Hr1G016590	unknown function	1H	53376206	53377105	-	No	HC_U	-	-
QFD.73xC.1.1	HORVU1Hr1G016600	Protein of unknown function (DUF594)	1H	53580054	53593622	-	No	HC_U	IPR007658,IPR025315	-
QFD.73xC.1.1	HORVU1Hr1G016610	Nucleotide-sugar transporter family protein	1H	53849850	53850631	-	No	HC_G	-	-
QFD.73xC.1.1	HORVU1Hr1G016620	undescribed protein	1H	53884848	53885891	+	No	LC_u	-	-
QFD.73xC.1.1	HORVU1Hr1G016630	RNA polymerase II subunit B1 CTD phosphatase Rpap2	1H	54280574	54285108	+	No	HC_G	IPR007308	-
QFD.73xC.1.1	HORVU1Hr1G016640	Protein phosphatase 2C family protein	1H	54286009	54288770	-	No	HC_G	IPR000222,IPR001932	GO:0003824,GO:0043169
QFD.73xC.1.1	HORVU1Hr1G016650	undescribed protein	1H	54427041	54428430	-	No	LC_u	-	-
QFD.73xC.1.1	HORVU1Hr1G016660	Peroxidase superfamily protein	1H	54541481	54545758	+	No	HC_G	IPR019793,IPR019794,IPR000823,IPR002016,IPR010255	GO:0055114,GO:0004601,GO:0006979,GO:0020037
QFD.73xC.1.1	HORVU1Hr1G016670	undescribed protein	1H	54543929	54545747	-	No	LC_u	-	-
QFD.73xC.1.1	HORVU1Hr1G016680	undescribed protein	1H	54786752	54786871	+	No	LC_u	-	-
QFD.73xC.1.1	HORVU1Hr1G016690	undescribed protein	1H	54787140	54787624	+	No	LC_u	-	-
QFD.73xC.1.1	HORVU1Hr1G016700	Auxin transporter-like protein 3	1H	55070614	55075264	-	No	HC_G	IPR013057	-
QFD.73xC.1.1	HORVU1Hr1G016710	Protein FAR1-RELATED SEQUENCE 5	1H	55455998	55461062	-	No	HC_G	-	-
QFD.73xC.1.1	HORVU1Hr1G016720	Peroxidase superfamily protein	1H	55486897	55488369	-	No	HC_G	IPR019793,IPR019794,IPR000823,IPR002016,IPR010255	GO:0055114,GO:0004601,GO:0006979,GO:0020037
QFD.73xC.1.1	HORVU1Hr1G016730	Peroxidase superfamily protein	1H	55496864	55498424	-	No	HC_G	IPR019793,IPR019794,IPR000823,IPR002016,IPR010255	GO:0055114,GO:0004601,GO:0006979,GO:0020037
QFD.73xC.1.1	HORVU1Hr1G016740	undescribed protein	1H	55496876	55498423	+	No	LC_u	-	-
QFD.73xC.1.1	HORVU1Hr1G016750	undescribed protein	1H	55530384	55530637	-	No	LC_u	-	-
QFD.73xC.1.1	HORVU1Hr1G016760	Pectate lyase family protein	1H	55812613	55813062	-	No	HC_G	IPR002022,IPR011050,IPR012334	-
QFD.73xC.1.1	HORVU1Hr1G016770	Peroxidase superfamily protein	1H	55918164	55920232	+	No	HC_G	IPR019793,IPR019794,IPR000823,IPR002016,IPR010255	GO:0055114,GO:0004601,GO:0006979,GO:0020037
QFD.73xC.1.1	HORVU1Hr1G016780	undescribed protein	1H	55920438	55921657	+	No	LC_u	-	-
QFD.73xC.1.1	HORVU1Hr1G016790	unknown function	1H	56118358	56130741	+	No	HC_U	-	-
QFD.73xC.1.1	HORVU1Hr1G016800	unknown function	1H	56125065	56125277	+	No	HC_G	IPR016197	-
QFD.73xC.1.1	HORVU1Hr1G016810	undescribed protein	1H	56129653	56130724	-	No	LC_u	-	-
QFD.73xC.1.1	HORVU1Hr1G016820	Peroxidase superfamily protein	1H	56131786	56133188	-	No	HC_G	IPR019793,IPR019794,IPR000823,IPR002016,IPR010255	GO:0055114,GO:0004601,GO:0006979,GO:0020037
QFD.73xC.1.1	HORVU1Hr1G016830	Retrotransposon protein, putative, Ty1-copia subclass	1H	56146030	56147220	-	No	LC_TE	-	-
QFD.73xC.1.1	HORVU1Hr1G016840	Peroxidase superfamily protein	1H	56148395	56150007	-	No	HC_G	IPR019793,IPR019794,IPR000823,IPR002016,IPR010255	GO:0055114,GO:0004601,GO:0006979,GO:0020037
QFD.73xC.1.1	HORVU1Hr1G016850	undescribed protein	1H	56168594	56170786	-	No	LC_u	-	-
QFD.73xC.1.1	HORVU1Hr1G016860	undescribed protein	1H	56452764	56453703	-	No	LC_u	-	-
QFD.73xC.1.1	HORVU1Hr1G016870	Peroxidase superfamily protein	1H	56454577	56456069	+	No	HC_G	IPR019793,IPR019794,IPR000823,IPR002016,IPR010255	GO:0055114,GO:0004601,GO:0006979,GO:0020037
QFD.73xC.1.1	HORVU1Hr1G016880	undescribed protein	1H	56529287	56530938	-	No	LC_u	-	-
QFD.73xC.1.1	HORVU1Hr1G016890	undescribed protein	1H	56707874	56708071	-	No	LC_u	-	-
QFD.73xC.1.1	HORVU1Hr1G016900	undescribed protein	1H	56791345	56791844	-	No	LC_U	IPR025064	-
QFD.73xC.1.1	HORVU1Hr1G016910	HAT family dimerisation domain containing protein, expressed	1H	56965212	56965591	+	No	LC_TE	IPR008906	GO:0046983
QFD.73xC.1.1	HORVU1Hr1G016920	undescribed protein	1H	57063857	57064004	-	No	LC_u	-	-
QFD.73xC.1.1	HORVU1Hr1G016930	Tyrosine-sulfated glycopeptide receptor 1	1H	57081505	57081900	+	No	HC_G	IPR017923	GO:0003677,GO:0005634,GO:0006351
QFD.73xC.1.1	HORVU1Hr1G016940	undescribed protein	1H	57082203	57087121	-	No	LC_u	-	-
QFD.73xC.1.1	HORVU1Hr1G016950	unknown protein	1H	57107045	57107297	-	No	LC_U
QFD.73xC.1.1	HORVU1Hr1G016960	Tyrosine-sulfated glycopeptide receptor 1	1H	57159229	57159624	-	No	HC_G	IPR017923	GO:0003677,GO:0005634,GO:0006351
QFD.73xC.1.1	HORVU1Hr1G016970	undescribed protein	1H	57172595	57174304	-	No	LC_u	-	-
QFD.73xC.1.1	HORVU1Hr1G016980	Peroxidase superfamily protein	1H	57229915	57233663	+	No	HC_G	IPR019793,IPR000823,IPR002016,IPR010255	GO:0055114,GO:0004601,GO:0006979,GO:0020037
QFD.73xC.1.1	HORVU1Hr1G016990	undescribed protein	1H	57230501	57230742	-	No	LC_u	-	-
QFD.73xC.1.1	HORVU1Hr1G017000	undescribed protein	1H	57231019	57231182	+	No	LC_u	-	-
QFD.73xC.1.1	HORVU1Hr1G017010	-	1H	57231917	57232075	.	No	-	-	-
QFD.73xC.1.1	HORVU1Hr1G017020	undescribed protein	1H	57260119	57261381	+	No	HC_G	IPR011598	GO:0046983
QFD.73xC.1.1	HORVU1Hr1G017030	Retrotransposon protein, putative, Ty1-copia subclass	1H	57274322	57275496	-	No	LC_TE	IPR012337	GO:0003676
QFD.73xC.1.1	HORVU1Hr1G017040	TTF-type zinc finger protein with HAT dimerisation domain	1H	57278624	57279674	-	No	LC_TE	-	-
QFD.73xC.1.1	HORVU1Hr1G017050	Glutathione S-transferase family protein	1H	57516547	57518016	+	No	HC_G	IPR012336,IPR004045,IPR004046,IPR010987	GO:0005515
QFD.73xC.1.1	HORVU1Hr1G017060	unknown function	1H	57538063	57538584	+	No	LC_TE	-	-
QFD.73xC.1.1	HORVU1Hr1G017070	Lecithin-cholesterol acyltransferase-like 1	1H	57551552	57552163	+	No	HC_G	IPR003386	GO:0006629,GO:0008374
QFD.73xC.1.1	HORVU1Hr1G017080	Lecithin-cholesterol acyltransferase-like 1	1H	57552257	57553268	+	No	HC_G	IPR003386,IPR029058	GO:0006629,GO:0008374
QFD.73xC.1.1	HORVU1Hr1G017090	undescribed protein	1H	57576712	57576901	+	No	LC_u	-	-
QFD.73xC.1.1	HORVU1Hr1G017100	Ubiquitin carboxyl-terminal hydrolase family protein	1H	57873489	57876933	+	No	HC_G	IPR021099	-
QFD.73xC.1.1	HORVU1Hr1G017110	undescribed protein	1H	57882002	57883595	-	No	LC_u	-	-
QFD.73xC.1.1	HORVU1Hr1G017120	Protein kinase superfamily protein	1H	57887924	57892274	+	No	HC_G	IPR008271,IPR011009,IPR017441,IPR000719,IPR001245,IPR002290	GO:0004672,GO:0005524,GO:0006468
QFD.73xC.1.1	HORVU1Hr1G017130	unknown protein	1H	57887934	57896770	-	No	LC_U
QFD.73xC.1.1	HORVU1Hr1G017140	undescribed protein	1H	57895267	57896602	+	No	LC_u	-	-
QFD.73xC.1.1	HORVU1Hr1G017150	undescribed protein	1H	57896703	57897432	+	No	LC_u	-	-
QFD.73xC.1.1	HORVU1Hr1G017160	Retrotransposon protein, putative, unclassified	1H	57910516	57910635	-	No	LC_TE	-	-
QFD.73xC.1.1	HORVU1Hr1G017170	germin-like protein 10	1H	57956392	57957752	+	No	HC_G	IPR014710,IPR019780,IPR001929,IPR006045,IPR011051	GO:0030145,GO:0045735
QFD.73xC.1.1	HORVU1Hr1G017180	undescribed protein	1H	58132795	58133367	-	No	LC_u	-	-
QFD.73xC.1.1	HORVU1Hr1G017190	Chromosome 3B, genomic scaffold, cultivar Chinese Spring	1H	58149622	58151068	+	No	HC_U	-	-
QFD.73xC.1.1	HORVU1Hr1G017200	unknown function	1H	58154171	58154496	+	No	LC_U	-	-
QFD.73xC.1.1	HORVU1Hr1G017210	Peptide chain release factor 1	1H	58319729	58322866	+	No	HC_G	IPR014720,IPR000352,IPR004373,IPR005139	GO:0016149,GO:0003747,GO:0005737,GO:0006415
QFD.73xC.1.1	HORVU1Hr1G017220	zinc ion binding	1H	58325300	58329575	+	No	HC_TE?	-	-
QFD.73xC.1.1	HORVU1Hr1G017230	undescribed protein	1H	58332650	58333916	-	No	HC_u	-	-
QFD.73xC.1.1	HORVU1Hr1G017240	serine/threonine protein kinase 1	1H	58438523	58442634	+	No	HC_G	IPR008271,IPR011009,IPR017441,IPR018451,IPR028375,IPR000719,IPR002290,IPR004041	GO:0007165,GO:0004672,GO:0005524,GO:0006468
QFD.73xC.1.1	HORVU1Hr1G017250	undescribed protein	1H	58441966	58442633	-	No	LC_u	-	-
QFD.73xC.1.1	HORVU1Hr1G017260	COP9 signalosome complex subunit 5b	1H	58478014	58480423	+	No	HC_G	IPR000555	GO:0005515
QFD.73xC.1.1	HORVU1Hr1G017270	Thioesterase superfamily protein	1H	58478818	58479862	-	No	HC_G	IPR029069	-
QFD.73xC.1.1	HORVU1Hr1G017280	Retrovirus-related Pol polyprotein from transposon TNT 1-94	1H	58551986	58552192	+	No	LC_TE	-	-
QFD.73xC.1.1	HORVU1Hr1G017290	unknown function	1H	58689115	58689324	+	No	HC_U	-	-
QFD.73xC.1.1	HORVU1Hr1G017300	unknown function	1H	58698443	58699102	+	No	LC_U	-	-
QFD.73xC.1.1	HORVU1Hr1G017310	undescribed protein	1H	58808202	58809551	+	No	LC_u	-	-
QFD.73xC.1.1	HORVU1Hr1G017320	Ankyrin repeat family protein	1H	58821595	58823691	-	No	HC_G	IPR002110,IPR020683	GO:0005515
QFD.73xC.1.1	HORVU1Hr1G017330	NF-X1-type zinc finger protein NFXL1	1H	58827085	58827448	+	No	HC_TE?	IPR013083	-
QFD.73xC.1.1	HORVU1Hr1G017340	undescribed protein	1H	58828366	58831446	+	No	LC_u	-	-
QFD.73xC.1.1	HORVU1Hr1G017350	undescribed protein	1H	58828579	58831161	-	No	LC_u	-	-
QFD.73xC.1.1	HORVU1Hr1G017360	undescribed protein	1H	58838835	58839860	+	No	LC_u	-	-
QFD.73xC.1.1	HORVU1Hr1G017370	Triacylglycerol lipase SDP1	1H	58848040	58849704	-	No	HC_G	-	-
QFD.73xC.1.1	HORVU1Hr1G017380	serine/threonine protein kinase 1	1H	58852496	58857986	+	No	HC_G	IPR011009,IPR018451,IPR028375,IPR000719,IPR001772,IPR004041	GO:0007165,GO:0004672,GO:0005524,GO:0006468
QFD.73xC.1.1	HORVU1Hr1G017390	undescribed protein	1H	58853099	58853263	+	No	LC_u	-	-
QFD.73xC.1.1	HORVU1Hr1G017400	undescribed protein	1H	58898872	58899560	-	No	LC_u	-	-
QFD.73xC.1.1	HORVU1Hr1G017410	HXXXD-type acyl-transferase family protein	1H	59216198	59224810	+	No	HC_G	IPR003480,IPR023213	GO:0016747
QFD.73xC.1.1	HORVU1Hr1G017420	undescribed protein	1H	59220719	59221190	+	No	LC_u	-	-
QFD.73xC.1.1	HORVU1Hr1G017430	DNA repair and recombination protein RAD54	1H	59253645	59254624	-	No	HC_G	-	-
QFD.73xC.1.1	HORVU1Hr1G017440	DNA repair and recombination protein RAD54	1H	59254787	59256596	-	No	HC_G	-	-
QFD.73xC.1.1	HORVU1Hr1G017450	Chromosome 3B, genomic scaffold, cultivar Chinese Spring	1H	59269897	59279869	-	No	LC_U	-	-
QFD.73xC.1.1	HORVU1Hr1G017460	Lipid A export ATP-binding/permease protein MsbA	1H	59275718	59285843	+	No	HC_G	IPR017871,IPR027417,IPR003439,IPR003593,IPR011527	GO:0016887,GO:0042626,GO:0055085,GO:0005524,GO:0006810,GO:0016021
QFD.73xC.1.1	HORVU1Hr1G017470	Reticulon family protein	1H	59535232	59537654	+	No	HC_G	IPR003388	-
QFD.73xC.1.1	HORVU1Hr1G017480	unknown function	1H	59558212	59560195	-	No	HC_G	IPR012336	-
QFD.73xC.1.1	HORVU1Hr1G017490	Pentatricopeptide repeat-containing protein	1H	59578632	59582724	+	No	HC_G	IPR002885	-
QFD.73xC.1.1	HORVU1Hr1G017500	Protein kinase superfamily protein	1H	59581204	59584712	-	No	HC_G	IPR013320,IPR017441,IPR000719,IPR002290,IPR011009	GO:0004672,GO:0005524,GO:0006468
QFD.73xC.1.1	HORVU1Hr1G017510	unknown function	1H	59603055	59603282	+	No	HC_U	-	-
QFD.73xC.1.1	HORVU1Hr1G017520	unknown function	1H	59608367	59608913	-	No	HC_TE?	IPR006564,IPR007527	GO:0008270
QFD.73xC.1.1	HORVU1Hr1G017530	undescribed protein	1H	59713423	59714763	-	No	HC_u	-	-
QFD.73xC.1.1	HORVU1Hr1G017540	unknown function	1H	59728441	59728706	-	No	LC_TE	-	-
QFD.73xC.1.1	HORVU1Hr1G017550	unknown function	1H	59729558	59730433	-	No	HC_U	-	-
QFD.73xC.1.1	HORVU1Hr1G017560	undescribed protein	1H	59780017	59780702	-	No	LC_u	-	-
QFD.73xC.1.1	HORVU1Hr1G017570	Aspartic protease 3	1H	59785249	59792274	+	No	HC_G	IPR008138,IPR008139,IPR011001,IPR021109,IPR001461,IPR001969,IPR007856	GO:0004190,GO:0006508,GO:0006629
QFD.73xC.1.1	HORVU1Hr1G017580	Proofreading thioesterase EntH	1H	59794397	59797573	-	No	HC_G	IPR003736,IPR006683,IPR029069	-
QFD.73xC.1.1	HORVU1Hr1G017590	undescribed protein	1H	60110397	60110538	-	No	LC_u	-	-
QFD.73xC.1.1	HORVU1Hr1G017600	unknown function	1H	60542412	60542873	-	No	LC_U	-	-
QFD.73xC.1.1	HORVU1Hr1G017610	undescribed protein	1H	60546869	60549643	+	No	LC_u	-	-
QFD.73xC.1.1	HORVU1Hr1G017620	undescribed protein	1H	60547573	60548893	-	No	LC_u	-	-
QFD.73xC.1.1	HORVU1Hr1G017630	undescribed protein	1H	60550771	60552342	-	No	LC_u	-	-
QFD.73xC.1.1	HORVU1Hr1G017640	undescribed protein	1H	60746542	60749744	+	No	LC_u	-	-
QFD.73xC.1.1	HORVU1Hr1G017650	undescribed protein	1H	60746618	60749313	-	No	LC_u	-	-
QFD.73xC.1.1	HORVU1Hr1G017660	unknown protein	1H	60907934	60909211	-	No	HC_U
QFD.73xC.1.1	HORVU1Hr1G017670	Chitinase family protein	1H	60972624	60974125	-	No	HC_G	IPR000726,IPR016283,IPR023346	GO:0016998,GO:0004568,GO:0005975,GO:0006032
QFD.73xC.1.1	HORVU1Hr1G017680	undescribed protein	1H	61115781	61116349	-	No	LC_u	-	-
QFD.73xC.1.1	HORVU1Hr1G017690	undescribed protein	1H	61116753	61117736	-	No	LC_u	-	-
QFD.73xC.1.1	HORVU1Hr1G017700	Hydrophobic protein LTI6B	1H	61118615	61119514	-	No	HC_G	IPR000612	GO:0016021
QFD.73xC.1.1	HORVU1Hr1G017710	SWI/SNF-related matrix-associated actin-dependent regulator of chromatin subfamily B member 1-A	1H	61124506	61129528	-	No	HC_G	IPR006939	GO:0000228,GO:0006338
QFD.73xC.1.1	HORVU1Hr1G017720	F-box protein PP2-A13	1H	61130020	61135456	-	No	HC_TE?	-	-
QFD.73xC.1.1	HORVU1Hr1G017730	Nuclear receptor corepressor 1	1H	61130176	61132451	+	No	HC_G	-	-
QFD.73xC.1.1	HORVU1Hr1G017740	phosphoenolpyruvate carboxylase 3	1H	61136677	61143259	-	No	HC_G	-	-
QFD.73xC.1.1	HORVU1Hr1G017750	undescribed protein	1H	61137560	61143259	+	No	HC_u	-	-
QFD.73xC.1.1	HORVU1Hr1G017760	unknown function	1H	61148132	61148712	+	No	LC_U	-	-
QFD.73xC.1.1	HORVU1Hr1G017770	Auxin-responsive protein IAA4	1H	61271314	61272801	-	No	HC_G	IPR000270,IPR003311	GO:0005515,GO:0005634,GO:0006355
QFD.73xC.1.1	HORVU1Hr1G017780	undescribed protein	1H	61275883	61277226	-	No	LC_u	-	-
QFD.73xC.1.1	HORVU1Hr1G017790	undescribed protein	1H	61315198	61316010	+	No	LC_u	-	-
QFD.73xC.1.1	HORVU1Hr1G017800	Histone superfamily protein	1H	61341051	61341950	+	No	HC_G	IPR000164,IPR007125,IPR009072	GO:0000786,GO:0003677,GO:0046982
QFD.73xC.1.1	HORVU1Hr1G017810	unknown function	1H	61351865	61352392	+	No	LC_TE	IPR027806	-
QFD.73xC.1.1	HORVU1Hr1G017820	Chromosome 3B, genomic scaffold, cultivar Chinese Spring	1H	61352583	61354732	-	No	LC_TE	IPR024752	-
QFD.73xC.1.1	HORVU1Hr1G017830	Histone superfamily protein	1H	61356166	61357141	+	No	HC_G	IPR001951,IPR009072,IPR019809	GO:0006334,GO:0046982,GO:0000786,GO:0003677,GO:0005634
QFD.73xC.1.1	HORVU1Hr1G017840	undescribed protein	1H	61636807	61637396	-	No	HC_u	-	-
QFD.73xC.1.1	HORVU1Hr1G017850	50S ribosomal protein L2, chloroplastic	1H	61748172	61748285	+	No	HC_G	IPR012340,IPR022666	GO:0006412,GO:0003735,GO:0005622,GO:0005840
QFD.73xC.1.1	HORVU1Hr1G017860	30S ribosomal protein S19, chloroplastic	1H	61749780	61749995	+	No	HC_G	IPR023575,IPR002222,IPR005732,IPR020934	GO:0006412,GO:0015935,GO:0003723,GO:0003735,GO:0005840
QFD.73xC.1.1	HORVU1Hr1G017870	Photosystem II protein D1	1H	61750115	61750351	-	No	HC_G	IPR000484	GO:0009772,GO:0019684,GO:0045156
QFD.73xC.1.1	HORVU1Hr1G017880	unknown function	1H	61917654	61918292	-	No	LC_U	-	-
QFD.73xC.1.1	HORVU1Hr1G017890	unknown function	1H	61918389	61919140	-	No	LC_TE	IPR006912	GO:0016788
QFD.73xC.1.1	HORVU1Hr1G017900	Transcription factor PIF3	1H	61919204	61923605	+	No	HC_G	IPR011598	GO:0046983
QFD.73xC.1.1	HORVU1Hr1G017910	undescribed protein	1H	61925243	61929041	+	No	LC_u	-	-
QFD.73xC.1.1	HORVU1Hr1G017920	11S seed storage protein	1H	62113826	62114083	-	No	HC_G	IPR014710	-
QFD.73xC.1.1	HORVU1Hr1G017930	11S seed storage protein	1H	62126957	62127214	-	No	HC_G	IPR014710	-
QFD.73xC.1.1	HORVU1Hr1G017940	TTF-type zinc finger protein with HAT dimerisation domain	1H	63093825	63095843	+	No	LC_TE	IPR012337,IPR025398	GO:0003676
QFD.73xC.1.1	HORVU1Hr1G017950	HAT family dimerisation domain containing protein	1H	63095904	63096344	+	No	LC_TE	IPR008906,IPR012337	GO:0003676,GO:0046983
QFD.73xC.1.1	HORVU1Hr1G017960	undescribed protein	1H	63226202	63235806	-	No	LC_u	-	-
QFD.73xC.1.1	HORVU1Hr1G017970	myb domain protein 61	1H	63226660	63235665	+	No	HC_G	IPR001005,IPR009057,IPR017930	GO:0003677
QFD.73xC.1.1	HORVU1Hr1G017980	undescribed protein	1H	63298250	63298571	+	No	LC_u	-	-
QFD.73xC.1.1	HORVU1Hr1G017990	undescribed protein	1H	63368570	63368769	+	No	LC_u	-	-
QFD.73xC.1.1	HORVU1Hr1G018000	B3 domain-containing protein	1H	63425128	63426986	+	No	HC_G	IPR003340,IPR015300	GO:0003677
QFD.73xC.1.1	HORVU1Hr1G018010	unknown function	1H	63619002	63621305	+	No	HC_U	-	-
QFD.73xC.1.1	HORVU1Hr1G018020	RING/U-box superfamily protein isoform 6	1H	63947104	63948559	-	No	HC_G	-	-
QFD.73xC.1.1	HORVU1Hr1G018030	undescribed protein	1H	63949612	63950400	-	No	HC_u	-	-
QFD.73xC.1.1	HORVU1Hr1G018040	Lysine-specific demethylase 5B	1H	63953327	63953533	-	No	HC_G	-	-
QFD.73xC.1.1	HORVU1Hr1G018050	Protein YIPF	1H	64009152	64009956	-	No	HC_G	-	-
QFD.73xC.1.1	HORVU1Hr1G018060	RNA-binding protein 8A	1H	64110158	64114041	+	No	HC_G	IPR000504,IPR008111,IPR012677	GO:0005634,GO:0005737,GO:0006396,GO:0000166,GO:0003676,GO:0003723
QFD.73xC.1.1	HORVU1Hr1G018070	undescribed protein	1H	64239847	64240341	-	No	LC_u	-	-
QFD.73xC.1.1	HORVU1Hr1G018080	ATP-dependent RNA helicase DOB1	1H	64300950	64306233	-	No	HC_G	IPR027417	-
QFD.73xC.1.1	HORVU1Hr1G018090	Diacylglycerol kinase	1H	64333184	64333538	+	No	HC_G	-	-
QFD.73xC.1.1	HORVU1Hr1G018100	Lysine-specific demethylase REF6	1H	64437757	64438097	+	No	HC_TE?	IPR013087	GO:0003676
QFD.73xC.1.1	HORVU1Hr1G018110	undescribed protein	1H	64437950	64438143	-	No	LC_u	-	-
QFD.73xC.1.1	HORVU1Hr1G018120	undescribed protein	1H	64523756	64524162	-	No	LC_u	-	-
QFD.73xC.1.1	HORVU1Hr1G018130	undescribed protein	1H	65312283	65312390	-	No	LC_TE	IPR009027,IPR011320	-
QFD.73xC.1.1	HORVU1Hr1G018140	Dehydrogenase/reductase SDR family member 4	1H	65592166	65593858	-	No	HC_G	IPR020904,IPR002198,IPR002347,IPR016040	GO:0008152,GO:0016491
QFD.73xC.1.1	HORVU1Hr1G018150	unknown function	1H	65593816	65606671	+	No	HC_TE?	IPR001810	GO:0005515
QFD.73xC.1.1	HORVU1Hr1G018160	undescribed protein	1H	65609875	65613044	-	No	LC_u	-	-
QFD.73xC.1.1	HORVU1Hr1G018170	HXXXD-type acyl-transferase family protein	1H	65856588	65857266	-	No	HC_G	IPR003480,IPR023213	GO:0016747
QFD.73xC.1.1	HORVU1Hr1G018180	BED zinc finger family protein, expressed	1H	65911207	65911557	+	No	HC_TE?	-	-
QFD.73xC.1.1	HORVU1Hr1G018190	pentatricopeptide repeat 336	1H	65994447	65997560	-	No	HC_G	IPR002885	-
QFD.73xC.1.1	HORVU1Hr1G018200	HXXXD-type acyl-transferase family protein	1H	66105260	66109104	-	No	HC_G	IPR003480,IPR023213	GO:0016747
QFD.73xC.1.1	HORVU1Hr1G018210	Retrotransposon protein, putative, Ty1-copia subclass	1H	66118950	66133012	-	No	LC_TE	-	-
QFD.73xC.1.1	HORVU1Hr1G018220	undescribed protein	1H	66126666	66127507	-	No	LC_u	-	-
QFD.73xC.1.1	HORVU1Hr1G018230	Retrotransposon protein, putative, unclassified	1H	66127682	66130873	+	No	LC_TE	IPR007321	-
QFD.73xC.1.1	HORVU1Hr1G018240	undescribed protein	1H	66131111	66131518	+	No	LC_u	-	-
QFD.73xC.1.1	HORVU1Hr1G018250	Gag-pol polyprotein	1H	66148192	66149676	+	No	LC_TE	IPR000477,IPR001878	GO:0003676,GO:0008270
QFD.73xC.1.1	HORVU1Hr1G018260	HXXXD-type acyl-transferase family protein	1H	66182621	66190998	-	No	HC_G	IPR003480,IPR023213	GO:0016747
QFD.73xC.1.1	HORVU1Hr1G018270	-	1H	66186624	66186886	.	No	-	-	-
QFD.73xC.1.1	HORVU1Hr1G018280	undescribed protein	1H	66198297	66198585	-	No	LC_u	-	-
QFD.73xC.1.1	HORVU1Hr1G018290	Helicase-like protein	1H	66205800	66212895	+	No	HC_G	IPR027417	-
QFD.73xC.1.1	HORVU1Hr1G018300	undescribed protein	1H	66363397	66363748	+	No	LC_u	-	-
QFD.73xC.1.1	HORVU1Hr1G018310	Baculoviral IAP repeat-containing protein 3	1H	66430060	66435252	-	No	HC_G	IPR001841,IPR013083	GO:0005515,GO:0008270
QFD.73xC.1.1	HORVU1Hr1G018320	Retrotransposon protein, putative, unclassified	1H	66803003	66803224	-	No	LC_TE	IPR026960	-
QFD.73xC.1.1	HORVU1Hr1G018330	Retrotransposon protein, putative, Ty1-copia subclass	1H	66840993	66946110	+	No	LC_TE	IPR001878	GO:0003676,GO:0008270
QFD.73xC.1.1	HORVU1Hr1G018340	Nucleosome assembly protein 1	1H	66924826	66925035	-	No	HC_G
QFD.73xC.1.1	HORVU1Hr1G018350	undescribed protein	1H	67030513	67031321	-	No	HC_u	-	-
QFD.73xC.1.1	HORVU1Hr1G018360	unknown function	1H	67255183	67255945	-	No	HC_U	-	-
QFD.73xC.1.1	HORVU1Hr1G018370	undescribed protein	1H	67288427	67289119	-	No	HC_u	-	-
QFD.73xC.1.1	HORVU1Hr1G018380	Replication protein A 70 kDa DNA-binding subunit C	1H	67297058	67303566	-	No	HC_TE?	IPR007199,IPR012340,IPR013955,IPR031657,IPR001878,IPR004365,IPR004591	GO:0006260,GO:0006281,GO:0006310,GO:0008270,GO:0003676,GO:0003677,GO:0005634
QFD.73xC.1.1	HORVU1Hr1G018390	undescribed protein	1H	67666357	67667714	-	No	LC_u	-	-
QFD.73xC.1.1	HORVU1Hr1G018400	undescribed protein	1H	67666790	67667714	+	No	LC_u	-	-
QFD.73xC.1.1	HORVU1Hr1G018410	undescribed protein	1H	67668263	67668871	-	No	LC_u	-	-
QFD.73xC.1.1	HORVU1Hr1G018420	undescribed protein	1H	67691211	67692956	-	No	HC_u	-	-
QFD.73xC.1.1	HORVU1Hr1G018430	DUF1230 family protein	1H	67693936	67694133	+	No	HC_U	IPR009631	-
QFD.73xC.1.1	HORVU1Hr1G018440	undescribed protein	1H	67699321	67699654	+	No	LC_u	-	-
QFD.73xC.1.1	HORVU1Hr1G018450	unknown function	1H	67752824	67753894	-	No	HC_U	-	-
QFD.73xC.1.1	HORVU1Hr1G018460	undescribed protein	1H	67766455	67766986	-	No	LC_u	-	-
QFD.73xC.1.1	HORVU1Hr1G018470	undescribed protein	1H	67806463	67806687	-	No	LC_u	-	-
QFD.73xC.1.1	HORVU1Hr1G018480	undescribed protein	1H	67896513	67897468	-	No	HC_u	-	-
QFD.73xC.1.1	HORVU1Hr1G018490	undescribed protein	1H	68128401	68128579	-	No	LC_u	-	-
QFD.73xC.1.1	HORVU1Hr1G018500	GCN5-related N-acetyltransferase-like	1H	68165234	68168695	+	No	HC_G	IPR000182,IPR016181	GO:0008080
QFD.73xC.1.1	HORVU1Hr1G018510	undescribed protein	1H	68360806	68361595	+	No	LC_u	-	-
QFD.73xC.1.1	HORVU1Hr1G018520	undescribed protein	1H	68361365	68362322	-	No	LC_u	-	-
QFD.73xC.1.1	HORVU1Hr1G018530	Tubulin--tyrosine ligase-like protein 12	1H	68362631	68364450	+	No	HC_G	-	-
QFD.73xC.1.1	HORVU1Hr1G018540	alanine aminotransferase 2	1H	68365070	68370382	-	No	HC_G	IPR015424,IPR004839,IPR015421,IPR015422	GO:0003824,GO:0009058,GO:0030170
QFD.73xC.1.1	HORVU1Hr1G018550	undescribed protein	1H	68366986	68367194	+	No	LC_u	-	-
QFD.73xC.1.1	HORVU1Hr1G018560	undescribed protein	1H	68378121	68380494	-	No	LC_u	-	-
QFD.73xC.1.1	HORVU1Hr1G018570	undescribed protein	1H	68378447	68380503	+	No	LC_u	-	-
QFD.73xC.1.1	HORVU1Hr1G018580	undescribed protein	1H	68450283	68450999	+	No	LC_u	-	-
QFD.73xC.1.1	HORVU1Hr1G018590	unknown protein	1H	68581091	68581768	-	No	HC_U
QFD.73xC.1.1	HORVU1Hr1G018600	2-oxoglutarate (2OG) and Fe(II)-dependent oxygenase superfamily protein	1H	68584248	68585869	-	No	HC_G	IPR005123,IPR026992,IPR027443	GO:0016491,GO:0055114
QFD.73xC.1.1	HORVU1Hr1G018610	undescribed protein	1H	68584477	68585813	+	No	HC_u	-	-
QFD.73xC.1.1	HORVU1Hr1G018620	undescribed protein	1H	68792241	68792789	+	No	LC_u	-	-
QFD.73xC.1.1	HORVU1Hr1G018630	Retrotransposon protein, putative, Ty1-copia subclass	1H	68796694	68797038	+	No	LC_TE	-	-
QFD.73xC.1.1	HORVU1Hr1G018640	undescribed protein	1H	68802799	68803274	+	No	LC_u	-	-
QFD.73xC.1.1	HORVU1Hr1G018650	undescribed protein	1H	68842948	68844586	+	No	LC_u	-	-
QFD.73xC.1.1	HORVU1Hr1G018660	undescribed protein	1H	69356401	69357544	-	No	LC_u	-	-
QFD.73xC.1.1	HORVU1Hr1G018670	undescribed protein	1H	69362257	69362566	+	No	LC_u	-	-
QFD.73xC.1.1	HORVU1Hr1G018680	Outer envelope pore protein 21, chloroplastic	1H	69398178	69399404	-	No	HC_G	-	-
QFD.73xC.1.1	HORVU1Hr1G018690	undescribed protein	1H	69573076	69573710	-	No	LC_u	-	-
QFD.73xC.1.1	HORVU1Hr1G018700	S-adenosyl-L-methionine-dependent methyltransferases superfamily protein, putative isoform 1	1H	69599927	69607665	+	No	HC_G	IPR019410,IPR029063	-
QFD.73xC.1.1	HORVU1Hr1G018710	Carboxypeptidase Y homolog A	1H	69603547	69607758	-	No	HC_G	IPR001563,IPR018202,IPR029058	GO:0004185,GO:0006508
QFD.73xC.1.1	HORVU1Hr1G018720	unknown protein	1H	69608303	69612780	-	No	HC_U
QFD.73xC.1.1	HORVU1Hr1G018730	cyclic nucleotide gated channel 7	1H	69747080	69749950	+	No	HC_G	IPR014710,IPR018490,IPR000048,IPR000595,IPR005821	GO:0016020,GO:0055085,GO:0005216,GO:0005515,GO:0006811
QFD.73xC.1.1	HORVU1Hr1G018740	mitogen-activated protein kinase 16	1H	69954814	69960705	+	No	HC_G	IPR011009,IPR017441,IPR000719,IPR002290,IPR003527	GO:0006468,GO:0004672,GO:0004707,GO:0005524
QFD.73xC.1.1	HORVU1Hr1G018750	Glioma tumor suppressor candidate region gene 2 protein	1H	69966805	69971732	+	No	HC_G	IPR011687	-
QFD.73xC.1.1	HORVU1Hr1G018760	undescribed protein	1H	69966907	69967672	-	No	LC_u	-	-
QFD.73xC.1.1	HORVU1Hr1G018770	Chymotrypsin inhibitor	1H	69971804	69972427	-	No	HC_G	IPR000864	GO:0004867,GO:0009611
QFD.73xC.1.1	HORVU1Hr1G018780	MBOAT (membrane bound O-acyl transferase) family protein	1H	70054432	70062041	-	No	HC_G	IPR004299	-
QFD.73xC.1.1	HORVU1Hr1G018790	WD-40 repeat family protein	1H	70062067	70069419	+	No	HC_G	IPR020472,IPR001680,IPR015943,IPR017986	GO:0005515
QFD.73xC.1.1	HORVU1Hr1G018800	undescribed protein	1H	70064754	70065762	+	No	LC_u	-	-
QFD.73xC.1.1	HORVU1Hr1G018810	undescribed protein	1H	70207631	70208393	+	No	LC_u	-	-
QFD.73xC.1.1	HORVU1Hr1G018820	undescribed protein	1H	70251969	70252597	+	No	LC_u	-	-
QFD.73xC.1.1	HORVU1Hr1G018830	undescribed protein	1H	70252890	70259612	-	No	LC_u	-	-
QFD.73xC.1.1	HORVU1Hr1G018840	Eukaryotic translation initiation factor 5B	1H	70339067	70347359	+	No	HC_G	-	-
QFD.73xC.1.1	HORVU1Hr1G018850	30S ribosomal protein S19, chloroplastic	1H	71162233	71162448	+	No	HC_G	IPR023575,IPR002222,IPR005732,IPR020934	GO:0006412,GO:0015935,GO:0003723,GO:0003735,GO:0005840
QFD.73xC.1.1	HORVU1Hr1G018860	undescribed protein	1H	71162962	71163177	+	No	LC_u	-	-
QFD.73xC.1.1	HORVU1Hr1G018870	undescribed protein	1H	71163276	71163452	+	No	HC_u	-	-
QFD.73xC.1.1	HORVU1Hr1G018880	undescribed protein	1H	71168373	71168817	-	No	LC_u	-	-
QFD.73xC.1.1	HORVU1Hr1G018890	30S ribosomal protein S15, chloroplastic	1H	71172036	71172613	+	No	HC_G	IPR000589,IPR005290,IPR009068	GO:0006412,GO:0003735,GO:0005622,GO:0005840
QFD.73xC.1.1	HORVU1Hr1G018900	-	1H	71173410	71173808	+	No	-	-	-
QFD.73xC.1.1	HORVU1Hr1G018910	undescribed protein	1H	71205153	71207290	-	No	LC_u	-	-
QFD.73xC.1.1	HORVU1Hr1G018920	undescribed protein	1H	71304150	71304251	+	No	LC_u	-	-
QFD.73xC.1.1	HORVU1Hr1G018930	Mitochondrial transcription termination factor family protein	1H	71393267	71400691	+	No	HC_G	IPR003690	GO:0003690,GO:0005739,GO:0006355
QFD.73xC.1.1	HORVU1Hr1G018940	undescribed protein	1H	71396597	71400643	-	No	LC_u	-	-
QFD.73xC.1.1	HORVU1Hr1G018950	unknown function	1H	71406261	71407668	-	No	LC_TE	IPR021109	-
QFD.73xC.1.1	HORVU1Hr1G018960	Protein of unknown function (DUF3537)	1H	71667500	71672253	+	No	LC_U	IPR021924	-
QFD.73xC.1.1	HORVU1Hr1G018970	undescribed protein	1H	71672434	71673367	+	No	LC_u	-	-
QFD.73xC.1.1	HORVU1Hr1G018980	undescribed protein	1H	71789477	71790109	-	No	LC_u	-	-
QFD.73xC.1.1	HORVU1Hr1G018990	undescribed protein	1H	71794453	71794721	-	No	LC_u	-	-
QFD.73xC.1.1	HORVU1Hr1G019000	ATP-dependent RNA helicase, putative	1H	71846595	71859036	+	No	HC_TE?	IPR014001,IPR027417,IPR001650,IPR003593,IPR011545	GO:0003676,GO:0005524
QFD.73xC.1.1	HORVU1Hr1G019010	undescribed protein	1H	71976888	71991229	-	No	LC_u	-	-
QFD.73xC.1.1	HORVU1Hr1G019020	undescribed protein	1H	71983199	71984087	+	No	LC_u	-	-
QFD.73xC.1.1	HORVU1Hr1G019030	undescribed protein	1H	72006669	72007125	+	No	LC_u	-	-
QFD.73xC.1.1	HORVU1Hr1G019040	Pol polyprotein	1H	72070632	72072017	-	No	LC_TE	IPR001584,IPR012337	GO:0003676,GO:0015074
QFD.73xC.1.1	HORVU1Hr1G019050	undescribed protein	1H	72072095	72072706	+	No	LC_u	-	-
QFD.73xC.1.1	HORVU1Hr1G019060	undescribed protein	1H	72073000	72074088	+	No	LC_u	-	-
QFD.73xC.1.1	HORVU1Hr1G019070	Chromodomain-helicase-DNA-binding protein 3	1H	72169471	72177789	-	No	LC_TE?	IPR001650,IPR027417	-
QFD.73xC.1.1	HORVU1Hr1G019080	undescribed protein	1H	72172785	72173594	+	No	LC_u	-	-
QFD.73xC.1.1	HORVU1Hr1G019090	undescribed protein	1H	72200165	72205187	-	No	LC_u	-	-
QFD.73xC.1.1	HORVU1Hr1G019100	unknown function	1H	72200165	72224788	+	No	LC_U	-	-
QFD.73xC.1.1	HORVU1Hr1G019110	Retrotransposon protein, putative, Ty1-copia subclass	1H	72208155	72224911	-	No	LC_TE	IPR013103	-
QFD.73xC.1.1	HORVU1Hr1G019120	undescribed protein	1H	72220047	72220859	-	No	LC_u	-	-
QFD.73xC.1.1	HORVU1Hr1G019130	undescribed protein	1H	72281397	72282243	-	No	LC_u	-	-
QFD.73xC.1.1	HORVU1Hr1G019140	Exocyst complex component 7	1H	72283743	72285738	-	No	HC_G	-	-
QFD.73xC.1.1	HORVU1Hr1G019150	Retrotransposon protein, putative, Ty3-gypsy subclass	1H	72286284	72287670	+	No	LC_TE	-	-
QFD.73xC.1.1	HORVU1Hr1G019160	Endoglucanase	1H	72288162	72289493	+	No	HC_G	-	-
QFD.73xC.1.1	HORVU1Hr1G019170	unknown function	1H	72290640	72291658	+	No	LC_TE	IPR001584,IPR002156,IPR012337	GO:0003676,GO:0004523,GO:0015074
QFD.73xC.1.1	HORVU1Hr1G019180	undescribed protein	1H	72293019	72294294	-	No	LC_u	-	-
QFD.73xC.1.1	HORVU1Hr1G019190	undescribed protein	1H	72293481	72293913	+	No	LC_u	-	-
QFD.73xC.1.1	HORVU1Hr1G019200	Retrotransposon protein, putative, unclassified	1H	72294452	72297725	-	No	LC_TE	IPR007321	-
QFD.73xC.1.1	HORVU1Hr1G019210	undescribed protein	1H	72297834	72298287	-	No	LC_u	-	-
QFD.73xC.1.1	HORVU1Hr1G019220	HXXXD-type acyl-transferase family protein	1H	72298413	72300624	-	No	HC_G	IPR003480,IPR023213	GO:0016747
QFD.73xC.1.1	HORVU1Hr1G019230	Retrotransposon protein, putative, Ty1-copia subclass	1H	72300823	72303598	-	No	LC_TE	IPR013103	-
QFD.73xC.1.1	HORVU1Hr1G019240	Transposon Ty1-BR Gag-Pol polyprotein	1H	72303723	72305288	-	No	LC_TE	IPR001584,IPR012337,IPR025724	GO:0003676,GO:0015074
QFD.73xC.1.1	HORVU1Hr1G019250	undescribed protein	1H	72305656	72307233	+	No	LC_u	-	-
QFD.73xC.1.1	HORVU1Hr1G019260	undescribed protein	1H	72307734	72309013	-	No	LC_u	-	-
QFD.73xC.1.1	HORVU1Hr1G019270	Retrotransposon protein, putative, unclassified	1H	72309134	72310218	-	No	LC_TE	-	-
QFD.73xC.1.1	HORVU1Hr1G019280	unknown function	1H	72310367	72311736	-	No	LC_U	IPR025558	-
QFD.73xC.1.1	HORVU1Hr1G019290	Transcription regulatory protein SNF2	1H	72311829	72320108	+	No	HC_G	-	-
QFD.73xC.1.1	HORVU1Hr1G019300	undescribed protein	1H	72316666	72317058	-	No	LC_u	-	-
QFD.73xC.1.1	HORVU1Hr1G019310	undescribed protein	1H	72322844	72323567	-	No	LC_u	-	-
QFD.73xC.1.1	HORVU1Hr1G019320	ankyrin repeat-containing protein 2	1H	72455521	72463987	+	No	HC_G	IPR020683,IPR001841,IPR002110,IPR013083	GO:0005515,GO:0008270
QFD.73xC.1.1	HORVU1Hr1G019330	Serine/threonine protein phosphatase family protein	1H	72525566	72536032	-	No	HC_G	IPR015915,IPR029052,IPR004843,IPR006186,IPR012391	GO:0016787,GO:0004721,GO:0005515,GO:0009742
QFD.73xC.1.1	HORVU1Hr1G019340	RAD3-like DNA-binding helicase protein	1H	72624566	72630744	+	No	HC_TE?	IPR010614,IPR010643,IPR013020,IPR014013,IPR027417,IPR001945,IPR006554,IPR006555	GO:0005524,GO:0005634,GO:0006139,GO:0006289,GO:0008026,GO:0016818,GO:0003676,GO:0003677,GO:0004003
QFD.73xC.1.1	HORVU1Hr1G019350	undescribed protein	1H	72730856	72731187	-	No	LC_u	-	-
QFD.73xC.1.1	HORVU1Hr1G019360	undescribed protein	1H	73037311	73052333	+	No	LC_u	-	-
QFD.73xC.1.1	HORVU1Hr1G019370	Ketohexokinase	1H	73086743	73088456	+	No	LC_TE?	IPR012337	GO:0003676
QFD.73xC.1.1	HORVU1Hr1G019380	HXXXD-type acyl-transferase family protein	1H	73145936	73147775	-	No	HC_G	IPR003480,IPR023213	GO:0016747
QFD.73xC.1.1	HORVU1Hr1G019390	P-loop containing nucleoside triphosphate hydrolases superfamily protein	1H	73170889	73177063	+	No	HC_G	-	-
QFD.73xC.1.1	HORVU1Hr1G019400	undescribed protein	1H	73173066	73174016	-	No	LC_u	-	-
QFD.73xC.1.1	HORVU1Hr1G019410	HXXXD-type acyl-transferase family protein	1H	73282592	73284335	+	No	HC_G	IPR003480,IPR023213	GO:0016747
QFD.73xC.1.1	HORVU1Hr1G019420	Transposon protein, putative, CACTA, En/Spm sub-class	1H	73285735	73286545	-	No	LC_TE	-	-
QFD.73xC.1.1	HORVU1Hr1G019430	undescribed protein	1H	73376347	73376686	-	No	LC_u	-	-
QFD.73xC.1.1	HORVU1Hr1G019440	undescribed protein	1H	73483365	73487012	+	No	LC_u	-	-
QFD.73xC.1.1	HORVU1Hr1G019450	undescribed protein	1H	73483365	73487012	-	No	LC_u	-	-
QFD.73xC.1.1	HORVU1Hr1G019460	undescribed protein	1H	73487559	73488433	+	No	LC_TE	-	-
QFD.73xC.1.1	HORVU1Hr1G019470	unknown function	1H	73493235	73493530	-	No	LC_TE	IPR000477	-
QFD.73xC.1.1	HORVU1Hr1G019480	Queuine tRNA-ribosyltransferase	1H	73571033	73572205	+	No	HC_G	IPR002616	GO:0006400,GO:0008479,GO:0008616
QFD.73xC.1.1	HORVU1Hr1G019490	Nuclear pore protein 84/107 containing protein, expressed	1H	73743483	73744060	-	No	HC_G	-	-
QFD.73xC.1.1	HORVU1Hr1G019500	sucrose-phosphatase 1	1H	73807416	73810946	+	No	HC_G	IPR012847,IPR013679,IPR023214,IPR032710,IPR006378,IPR006379,IPR006380	GO:0050307,GO:0000287,GO:0005986,GO:0016791
QFD.73xC.1.1	HORVU1Hr1G019510	RNA-binding CRS1 / YhbY (CRM) domain protein	1H	73816424	73816942	+	No	HC_G	-	-
QFD.73xC.1.1	HORVU1Hr1G019520	Endoglucanase 20	1H	73823183	73825890	+	No	HC_G	IPR001701,IPR008928,IPR012341	GO:0003824,GO:0004553,GO:0005975
QFD.73xC.1.1	HORVU1Hr1G019530	GDSL esterase/lipase	1H	73894562	73896903	+	No	HC_G	IPR001087,IPR013830	GO:0016788
QFD.73xC.1.1	HORVU1Hr1G019540	Retrotransposon protein, putative, unclassified	1H	73912479	73914226	-	No	LC_TE	IPR026960	-
QFD.73xC.1.1	HORVU1Hr1G019550	Retrotransposon protein, putative, unclassified	1H	73914481	73914844	-	No	LC_TE	-	-
QFD.73xC.1.1	HORVU1Hr1G019560	unknown function	1H	73917857	73919159	-	No	HC_TE?	IPR025558,IPR025836	-
QFD.73xC.1.1	HORVU1Hr1G019570	Fibronectin type III domain-containing protein	1H	73920478	73928662	+	No	HC_G	IPR003961,IPR013783,IPR032881	GO:0005515
QFD.73xC.1.1	HORVU1Hr1G019580	CRS1 / YhbY (CRM) domain-containing protein	1H	73929575	73934623	-	No	HC_G	IPR001890	GO:0003723
QFD.73xC.1.1	HORVU1Hr1G019590	SAD1/UNC-84 domain protein 2	1H	74214442	74218002	+	No	HC_G	IPR012919	-
QFD.73xC.1.1	HORVU1Hr1G019600	Pentatricopeptide repeat (PPR) superfamily protein	1H	74218747	74244557	-	No	HC_G	IPR002885	-
QFD.73xC.1.1	HORVU1Hr1G019610	undescribed protein	1H	74245399	74245706	-	No	LC_u	-	-
QFD.73xC.1.1	HORVU1Hr1G019620	undescribed protein	1H	74262793	74263411	+	No	LC_u	-	-
QFD.73xC.1.1	HORVU1Hr1G019630	Pentatricopeptide repeat-containing protein	1H	74266247	74267294	+	No	HC_G	IPR002885	-
QFD.73xC.1.1	HORVU1Hr1G019640	BRCT domain-containing DNA repair protein	1H	74325736	74331864	-	No	HC_G	IPR001357	-
QFD.73xC.1.1	HORVU1Hr1G019650	Nucleolar MIF4G domain-containing protein 1	1H	74327137	74338337	+	No	HC_G	IPR016024,IPR003890,IPR003891,IPR016021	GO:0003723,GO:0005488,GO:0005515
QFD.73xC.1.1	HORVU1Hr1G019660	Calcium-binding protein 4	1H	74334659	74338382	-	No	HC_G	IPR002048,IPR011992,IPR018247	GO:0005509
QFD.73xC.1.1	HORVU1Hr1G019670	Pentatricopeptide repeat-containing protein	1H	74338498	74342145	-	No	HC_G	IPR002885,IPR011990	GO:0005515
QFD.73xC.1.1	HORVU1Hr1G019680	undescribed protein	1H	74361777	74365006	+	No	LC_u	-	-
QFD.73xC.1.1	HORVU1Hr1G019690	HAT family dimerisation domain containing protein	1H	74365719	74366690	+	No	LC_TE	-	-
QFD.73xC.1.1	HORVU1Hr1G019700	TTF-type zinc finger protein with HAT dimerisation domain	1H	74366936	74367154	+	No	LC_TE	IPR025398	-
QFD.73xC.1.1	HORVU1Hr1G019710	Nodulin-like / Major Facilitator Superfamily protein	1H	74407069	74408871	+	No	HC_G	IPR010658,IPR020846	-
QFD.73xC.1.1	HORVU1Hr1G019720	Retrotransposon protein, putative, unclassified	1H	74490068	74490592	-	No	LC_TE	-	-
QFD.73xC.1.1	HORVU1Hr1G019730	Retrotransposon protein, putative, unclassified	1H	74491719	74492381	-	No	LC_TE	IPR025836	-
QFD.73xC.1.1	HORVU1Hr1G019740	Laccase-19	1H	74543467	74545525	+	No	HC_G	IPR011706,IPR011707,IPR017761,IPR001117,IPR002355,IPR008972	GO:0048046,GO:0052716,GO:0055114,GO:0005507,GO:0016491,GO:0046274
QFD.73xC.1.1	HORVU1Hr1G019750	Laccase-19	1H	74584459	74586782	-	No	HC_G	IPR011706,IPR011707,IPR017761,IPR001117,IPR002355,IPR008972	GO:0048046,GO:0052716,GO:0055114,GO:0005507,GO:0016491,GO:0046274
QFD.73xC.1.1	HORVU1Hr1G019760	-	1H	74591891	74592520	-	No	-	-	-
QFD.73xC.1.1	HORVU1Hr1G019770	Protein kinase superfamily protein	1H	74708905	74711535	-	No	HC_G	IPR008271,IPR011009,IPR013320,IPR000719,IPR001245,IPR002290	GO:0004672,GO:0005524,GO:0006468
QFD.73xC.1.1	HORVU1Hr1G019780	unknown function	1H	74719511	74719687	-	No	LC_TE	IPR026960	-
QFD.73xC.1.1	HORVU1Hr1G019790	undescribed protein	1H	74815826	74816564	+	No	LC_u	-	-
QFD.73xC.1.1	HORVU1Hr1G019800	undescribed protein	1H	74896596	74899615	-	No	LC_u	-	-
QFD.73xC.1.1	HORVU1Hr1G019810	undescribed protein	1H	74896644	74897806	+	No	LC_u	-	-
QFD.73xC.1.1	HORVU1Hr1G019820	Mutator protein	1H	74990331	74990558	-	No	LC_TE	-	-
QFD.73xC.1.1	HORVU1Hr1G019830	Endoplasmin homolog	1H	75384811	75385019	-	No	HC_G	IPR001404	GO:0051082,GO:0005524,GO:0006457,GO:0006950
QFD.73xC.1.1	HORVU1Hr1G019840	undescribed protein	1H	75387156	75387831	-	No	LC_u	-	-
QFD.73xC.1.1	HORVU1Hr1G019850	TTF-type zinc finger protein with HAT dimerisation domain	1H	75388182	75390242	+	No	LC_TE	IPR006580,IPR025398	-
QFD.73xC.1.1	HORVU1Hr1G019860	unknown function	1H	75393664	75393926	+	No	LC_U	-	-
QFD.73xC.1.1	HORVU1Hr1G019870	unknown function	1H	75398304	75398759	-	No	HC_U	-	-
QFD.73xC.1.1	HORVU1Hr1G019880	undescribed protein	1H	75440414	75440786	-	No	LC_u	-	-
QFD.73xC.1.1	HORVU1Hr1G019890	undescribed protein	1H	75449728	75450060	-	No	LC_u	-	-
QFD.73xC.1.1	HORVU1Hr1G019900	unknown function	1H	75453310	75453765	+	No	HC_U	-	-
QFD.73xC.1.1	HORVU1Hr1G019910	Reverse transcriptase	1H	75515333	75516834	-	No	LC_TE	IPR000477	-
QFD.73xC.1.1	HORVU1Hr1G019920	Endonuclease-reverse transcriptase	1H	75605024	75605858	-	No	LC_TE	IPR000477	-
QFD.73xC.1.1	HORVU1Hr1G019930	F-box family protein	1H	75608501	75609871	-	No	HC_TE?	IPR001810,IPR005174	GO:0005515
QFD.73xC.1.1	HORVU1Hr1G019940	hydroxyproline-rich glycoprotein family protein	1H	75705158	75708948	-	No	HC_G	-	-
QFD.73xC.1.1	HORVU1Hr1G019950	undescribed protein	1H	75708517	75709117	+	No	LC_u	-	-
QFD.73xC.1.1	HORVU1Hr1G019960	undescribed protein	1H	76130948	76132395	+	No	LC_u	-	-
QFD.73xC.1.1	HORVU1Hr1G019970	zinc-finger protein 3	1H	76320730	76321308	-	No	LC_TE	IPR007087,IPR013087,IPR015880	GO:0003676,GO:0046872
QFD.73xC.1.1	HORVU1Hr1G019980	undescribed protein	1H	76432055	76432415	+	No	LC_u	-	-
QFD.73xC.1.1	HORVU1Hr1G019990	unknown function	1H	76590039	76595708	-	No	LC_TE	IPR001878	GO:0003676,GO:0008270
QFD.73xC.1.1	HORVU1Hr1G020000	Protease Do-like 9	1H	76984039	76992770	+	No	HC_G	IPR001478,IPR001940,IPR009003	GO:0004252,GO:0005515,GO:0006508
QFD.73xC.1.1	HORVU1Hr1G020010	Pentatricopeptide repeat-containing protein	1H	76998224	77000693	+	No	HC_G	IPR002885,IPR011990	GO:0005515
QFD.73xC.1.1	HORVU1Hr1G020020	Protein kinase superfamily protein	1H	77001065	77004795	-	No	HC_G	IPR001480,IPR002290,IPR003609,IPR008271,IPR011009,IPR013320,IPR017441,IPR024171,IPR000719,IPR000858,IPR001245	GO:0006468,GO:0048544,GO:0004672,GO:0004674,GO:0005524
QFD.73xC.1.1	HORVU1Hr1G020030	Protein FAR-RED ELONGATED HYPOCOTYL 3	1H	77224075	77228649	-	No	HC_G	IPR004330	-
QFD.73xC.1.1	HORVU1Hr1G020040	Histone superfamily protein	1H	77482222	77483592	-	No	HC_G	IPR001951,IPR009072,IPR019809	GO:0006334,GO:0046982,GO:0000786,GO:0003677,GO:0005634
QFD.73xC.1.1	HORVU1Hr1G020050	Histone superfamily protein	1H	77485122	77486114	-	No	HC_G	IPR000164,IPR007125,IPR009072	GO:0000786,GO:0003677,GO:0046982
QFD.73xC.1.1	HORVU1Hr1G020060	Histone superfamily protein	1H	77584846	77585454	-	No	HC_G	IPR001951,IPR009072,IPR019809	GO:0006334,GO:0046982,GO:0000786,GO:0003677,GO:0005634
QFD.73xC.1.1	HORVU1Hr1G020070	Histone superfamily protein	1H	77587065	77588057	-	No	HC_G	IPR000164,IPR007125,IPR009072	GO:0000786,GO:0003677,GO:0046982
QFD.73xC.1.1	HORVU1Hr1G020080	Retrotransposon protein, putative, Ty3-gypsy subclass	1H	77600811	77602508	+	No	LC_TE	IPR001584,IPR012337	GO:0003676,GO:0015074
QFD.73xC.1.1	HORVU1Hr1G020090	Retrotransposon protein, putative, unclassified	1H	77714728	77715016	-	No	LC_TE	-	-
QFD.73xC.1.1	HORVU1Hr1G020100	undescribed protein	1H	77732658	77734277	+	No	LC_u	-	-
QFD.73xC.1.1	HORVU1Hr1G020110	undescribed protein	1H	77732739	77734192	-	No	LC_u	-	-
QFD.73xC.1.1	HORVU1Hr1G020120	unknown function	1H	77735005	77737246	+	No	HC_TE?	IPR001810	GO:0005515
QFD.73xC.1.1	HORVU1Hr1G020130	Retrotransposon protein, putative, Ty1-copia subclass	1H	77979787	77981368	-	No	LC_TE	-	-
QFD.73xC.1.1	HORVU1Hr1G020140	Endo-1,3	1H	77984088	77986299	-	No	HC_G
QFD.73xC.1.1	HORVU1Hr1G020150	unknown function	1H	78035552	78037557	-	No	HC_TE?	IPR001810	GO:0005515
QFD.73xC.1.1	HORVU1Hr1G020160	unknown protein	1H	78038120	78038743	+	No	HC_U
QFD.73xC.1.1	HORVU1Hr1G020170	Myosin-J heavy chain	1H	78611600	78616423	+	No	HC_G	-	-
QFD.73xC.1.1	HORVU1Hr1G020180	undescribed protein	1H	78615900	78616389	-	No	LC_u	-	-
QFD.73xC.1.1	HORVU1Hr1G020190	Pentatricopeptide repeat-containing protein	1H	78639448	78645462	-	No	HC_G	IPR002885	-
QFD.73xC.1.1	HORVU1Hr1G020200	Pentatricopeptide repeat-containing protein	1H	78700758	78703060	-	No	HC_G	IPR002885,IPR011990	GO:0005515
QFD.73xC.1.1	HORVU1Hr1G020210	Retrotransposon protein, putative, unclassified	1H	78754357	78754821	+	No	LC_TE	-	-
QFD.73xC.1.1	HORVU1Hr1G020220	Retrotransposon protein, putative, Ty3-gypsy subclass	1H	78756223	78756426	+	No	LC_TE	IPR000477	-
QFD.73xC.1.1	HORVU1Hr1G020230	unknown function	1H	78912409	78913153	+	No	LC_TE	IPR018289	-
QFD.73xC.1.1	HORVU1Hr1G020240	NBS-LRR disease resistance protein homologue	1H	78968804	79089572	+	No	HC_G	IPR032675	-
QFD.73xC.1.1	HORVU1Hr1G020250	undescribed protein	1H	78975586	79089572	-	No	LC_u	-	-
QFD.73xC.1.1	HORVU1Hr1G020260	undescribed protein	1H	78979757	78980036	-	No	LC_u	-	-
QFD.73xC.1.1	HORVU1Hr1G020270	BTB-POZ and MATH domain 2	1H	78980344	78982485	-	No	HC_G	IPR011333,IPR000210,IPR002083,IPR008974	GO:0005515
QFD.73xC.1.1	HORVU1Hr1G020280	GRF zinc finger family protein	1H	78982733	78983189	+	No	LC_TE?	-	-
QFD.73xC.1.1	HORVU1Hr1G020290	undescribed protein	1H	78983037	78983330	-	No	LC_u	-	-
QFD.73xC.1.1	HORVU1Hr1G020300	P-loop containing nucleoside triphosphate hydrolases superfamily protein	1H	79022049	79023519	+	No	HC_G	-	-
QFD.73xC.1.1	HORVU1Hr1G020310	undescribed protein	1H	79023613	79023792	+	No	HC_u	-	-
QFD.73xC.1.1	HORVU1Hr1G020320	unknown protein	1H	79052509	79060479	+	No	LC_U
QFD.73xC.1.1	HORVU1Hr1G020330	undescribed protein	1H	79061869	79063089	+	No	HC_u	-	-
QFD.73xC.1.1	HORVU1Hr1G020340	Mitochondral 37S ribosomal protein S27	1H	79062696	79064406	-	No	HC_G	IPR013219	-
QFD.73xC.1.1	HORVU1Hr1G020350	undescribed protein	1H	79089859	79090734	-	No	LC_u	-	-
QFD.73xC.1.1	HORVU1Hr1G020360	sodium hydrogen exchanger 2	1H	79212696	79218619	-	No	HC_G	IPR004709,IPR006153	GO:0015299,GO:0015385,GO:0016021,GO:0055085,GO:0006812,GO:0006814,GO:0006885
QFD.73xC.1.1	HORVU1Hr1G020370	BHLH transcription factor	1H	79585011	79592522	+	No	HC_G	IPR011598,IPR025610	GO:0046983
QFD.73xC.1.1	HORVU1Hr1G020380	NAC-domain protein 101	1H	79595404	79597574	-	No	HC_G	IPR003441	GO:0003677,GO:0006355
QFD.73xC.1.1	HORVU1Hr1G020390	cullin 1	1H	80265150	80271749	-	No	HC_G	IPR016158,IPR016159,IPR019559,IPR001373,IPR011991,IPR016157	GO:0006511,GO:0031461,GO:0031625
QFD.73xC.1.1	HORVU1Hr1G020400	cullin 1	1H	80289668	80297396	-	No	HC_G	IPR016158,IPR016159,IPR019559,IPR001373,IPR011991,IPR016157	GO:0006511,GO:0031461,GO:0031625
QFD.73xC.1.1	HORVU1Hr1G020410	1-aminocyclopropane-1-carboxylate oxidase	1H	80434081	80435278	-	No	HC_G	IPR005123,IPR026992,IPR027443	GO:0016491,GO:0055114
QFD.73xC.1.1	HORVU1Hr1G020420	Arabidopsis thaliana protein of unknown function (DUF821)	1H	80475435	80478390	+	No	HC_G	IPR006598	-
QFD.73xC.1.1	HORVU1Hr1G020430	1-aminocyclopropane-1-carboxylate oxidase	1H	80487032	80488367	-	No	HC_G	IPR005123,IPR026992,IPR027443	GO:0016491,GO:0055114
QFD.73xC.1.1	HORVU1Hr1G020440	undescribed protein	1H	80549604	80549859	+	No	LC_u	-	-
QFD.73xC.1.1	HORVU1Hr1G020450	1-aminocyclopropane-1-carboxylate oxidase	1H	80604309	80605970	+	No	HC_G	IPR005123,IPR026992,IPR027443	GO:0016491,GO:0055114
QFD.73xC.1.1	HORVU1Hr1G020460	Ubiquinol oxidase	1H	80825648	80825788	-	No	HC_G	-	-
QFD.73xC.1.1	HORVU1Hr1G020470	WD-40 repeat family protein	1H	80827355	80832088	+	No	HC_G	IPR019775,IPR020472,IPR001680,IPR015943,IPR017986	GO:0005515
QFD.73xC.1.1	HORVU1Hr1G020480	unknown function	1H	80844666	80846697	-	No	HC_U	-	-
QFD.73xC.1.1	HORVU1Hr1G020490	unknown function	1H	80917498	80919759	+	No	HC_U	-	-
QFD.73xC.1.1	HORVU1Hr1G020500	Tudor/PWWP/MBT superfamily protein	1H	80950251	80959471	-	No	HC_G	IPR000313	-
QFD.73xC.1.1	HORVU1Hr1G020510	undescribed protein	1H	80957426	80958217	+	No	LC_u	-	-
QFD.73xC.1.1	HORVU1Hr1G020520	unknown protein	1H	81042669	81043514	+	No	HC_U
QFD.73xC.1.1	HORVU1Hr1G020530	unknown function	1H	81122342	81226203	+	No	HC_U	-	-
QFD.73xC.1.1	HORVU1Hr1G020540	Transposon protein, putative, CACTA, En/Spm sub-class	1H	81136651	81137013	+	No	LC_TE	IPR027806	-
QFD.73xC.1.1	HORVU1Hr1G020550	undescribed protein	1H	81179740	81181175	-	No	HC_u	-	-
QFD.73xC.1.1	HORVU1Hr1G020560	UDP-Glycosyltransferase superfamily protein	1H	81291686	81293594	-	No	HC_G	IPR002213	GO:0008152,GO:0016758
QFD.73xC.1.1	HORVU1Hr1G020570	undescribed protein	1H	81431827	81432377	-	No	HC_u	-	-
QFD.73xC.1.1	HORVU1Hr1G020580	undescribed protein	1H	81432516	81432802	-	No	HC_u	-	-
QFD.73xC.1.1	HORVU1Hr1G020590	unknown function	1H	81515624	81521507	-	No	HC_U	-	-
QFD.73xC.1.1	HORVU1Hr1G020600	Xaa-Pro dipeptidase	1H	81522877	81524484	+	No	HC_G	IPR029149,IPR000994,IPR007865,IPR028980	GO:0004177,GO:0030145
QFD.73xC.1.1	HORVU1Hr1G020610	undescribed protein	1H	81809749	81810209	+	No	LC_u	-	-
QFD.73xC.1.1	HORVU1Hr1G020620	Elongator complex protein 2	1H	81825284	81832874	-	No	HC_G	IPR020472,IPR001680,IPR015943,IPR017986	GO:0005515
QFD.73xC.1.1	HORVU1Hr1G020630	undescribed protein	1H	81937395	81937855	-	No	LC_u	-	-
QFD.73xC.1.1	HORVU1Hr1G020640	Retrotransposon protein, putative, unclassified	1H	81957966	81958516	-	No	LC_TE	-	-
QFD.73xC.1.1	HORVU1Hr1G020650	ABC1 family protein	1H	81960264	81962651	-	No	HC_G	IPR004147	-
QFD.73xC.1.1	HORVU1Hr1G020660	Replication protein A 70 kDa DNA-binding subunit C	1H	81963547	81970237	-	No	HC_G	IPR012340,IPR013955,IPR031657,IPR004365,IPR004591,IPR007199	GO:0006260,GO:0006281,GO:0006310,GO:0003676,GO:0003677,GO:0005634
QFD.73xC.1.1	HORVU1Hr1G020670	undescribed protein	1H	82045116	82045379	+	No	HC_u	-	-
QFD.73xC.1.1	HORVU1Hr1G020680	unknown function	1H	82137591	82138239	-	No	LC_U	-	-
QFD.73xC.1.1	HORVU1Hr1G020690	Peroxidase superfamily protein	1H	82141298	82143805	-	No	HC_G	IPR000823,IPR002016,IPR010255	GO:0055114,GO:0004601,GO:0006979,GO:0020037
QFD.73xC.1.1	HORVU1Hr1G020700	undescribed protein	1H	82329230	82329846	+	No	LC_u	-	-
QFD.73xC.1.1	HORVU1Hr1G020710	C2H2-like zinc finger protein	1H	82454154	82454385	-	No	HC_TE?	IPR007087	GO:0046872
QFD.73xC.1.1	HORVU1Hr1G020720	Peroxidase superfamily protein	1H	82523739	82525605	+	No	HC_G	IPR019793,IPR019794,IPR000823,IPR002016,IPR010255	GO:0055114,GO:0004601,GO:0006979,GO:0020037
QFD.73xC.1.1	HORVU1Hr1G020730	unknown function	1H	82579989	82580337	-	No	LC_TE	IPR008906,IPR012337	GO:0003676,GO:0046983
QFD.73xC.1.1	HORVU1Hr1G020740	undescribed protein	1H	82688862	82693595	+	No	LC_u	-	-
QFD.73xC.1.1	HORVU1Hr1G020750	undescribed protein	1H	82689283	82693554	-	No	LC_u	-	-
QFD.73xC.1.1	HORVU1Hr1G020760	Pectate lyase	1H	82759015	82759287	+	No	HC_G	-	-
QFD.73xC.1.1	HORVU1Hr1G020770	undescribed protein	1H	82759154	82759491	-	No	LC_u	-	-
QFD.73xC.1.1	HORVU1Hr1G020780	Retrotransposon protein, putative, Ty1-copia subclass	1H	82759387	82760363	+	No	LC_TE	-	-
QFD.73xC.1.1	HORVU1Hr1G020790	Chlorophyll synthase, chloroplastic	1H	82770645	82770815	+	No	HC_G	-	-
QFD.73xC.1.1	HORVU1Hr1G020800	Peroxidase superfamily protein	1H	82780867	82783108	-	No	HC_G	IPR019793,IPR019794,IPR000823,IPR002016,IPR010255	GO:0055114,GO:0004601,GO:0006979,GO:0020037
QFD.73xC.1.1	HORVU1Hr1G020810	undescribed protein	1H	83218240	83219408	-	No	LC_u	-	-
QFD.73xC.1.1	HORVU1Hr1G020820	undescribed protein	1H	83221565	83222032	-	No	LC_u	-	-
QFD.73xC.1.1	HORVU1Hr1G020830	Retrotransposon protein, putative, unclassified	1H	83295789	83296342	-	No	LC_TE	-	-
QFD.73xC.1.1	HORVU1Hr1G020840	undescribed protein	1H	83331975	83332358	-	No	LC_u	-	-
QFD.73xC.1.1	HORVU1Hr1G020850	F-box family protein	1H	83403941	83421495	-	No	LC_TE?	IPR001810,IPR011047,IPR015916	GO:0005515
QFD.73xC.1.1	HORVU1Hr1G020860	Transposon protein, putative, CACTA, En/Spm sub-class	1H	83404023	83412982	+	No	LC_TE	IPR029480	-
QFD.73xC.1.1	HORVU1Hr1G020870	undescribed protein	1H	83413417	83701572	+	No	LC_u	-	-
QFD.73xC.1.1	HORVU1Hr1G020880	undescribed protein	1H	83415070	83417089	+	No	LC_TE	IPR009027,IPR011320	-
QFD.73xC.1.1	HORVU1Hr1G020890	Zinc knuckle family protein	1H	83420397	83421566	+	No	LC_TE?	IPR001878	GO:0003676,GO:0008270
QFD.73xC.1.1	HORVU1Hr1G020900	undescribed protein	1H	83473690	83474830	+	No	LC_u	-	-
QFD.73xC.1.1	HORVU1Hr1G020910	undescribed protein	1H	83475215	83475891	-	No	LC_u	-	-
QFD.73xC.1.1	HORVU1Hr1G020920	undescribed protein	1H	83477729	83478632	-	No	LC_u	-	-
QFD.73xC.1.1	HORVU1Hr1G020930	undescribed protein	1H	83479738	83480178	+	No	LC_u	-	-
QFD.73xC.1.1	HORVU1Hr1G020940	undescribed protein	1H	83480540	83481385	-	No	LC_u	-	-
QFD.73xC.1.1	HORVU1Hr1G020950	unknown function	1H	83482600	83491289	-	No	LC_TE	IPR013103	-
QFD.73xC.1.1	HORVU1Hr1G020960	undescribed protein	1H	83652016	83652301	+	No	LC_u	-	-
QFD.73xC.1.1	HORVU1Hr1G020970	Retrotransposon protein, putative, unclassified	1H	83679403	83679752	+	No	LC_TE	IPR005135	-
QFD.73xC.1.1	HORVU1Hr1G020980	undescribed protein	1H	83685770	83686322	+	No	LC_u	-	-
QFD.73xC.1.1	HORVU1Hr1G020990	Retrotransposon protein, putative, unclassified	1H	83686721	83687465	+	No	LC_TE	-	-
QFD.73xC.1.1	HORVU1Hr1G021000	F-box family protein	1H	83689654	83727408	-	No	HC_TE?	IPR001810,IPR011047	GO:0005515
QFD.73xC.1.1	HORVU1Hr1G021010	Retrovirus-related Pol polyprotein from transposon TNT 1-94	1H	83709728	83710261	+	No	LC_TE	-	-
QFD.73xC.1.1	HORVU1Hr1G021020	Retrotransposon protein, putative, Ty1-copia subclass	1H	83716692	83717031	+	No	LC_TE	-	-
QFD.73xC.1.1	HORVU1Hr1G021030	undescribed protein	1H	83889195	83890143	-	No	LC_u	-	-
QFD.73xC.1.1	HORVU1Hr1G021040	Pectinesterase inhibitor domain containing protein	1H	83937478	83938092	-	No	HC_G	IPR006501	GO:0004857
QFD.73xC.1.1	HORVU1Hr1G021050	undescribed protein	1H	83939345	83943995	+	No	LC_u	-	-
QFD.73xC.1.1	HORVU1Hr1G021060	undescribed protein	1H	83939849	83943995	-	No	LC_u	-	-
QFD.73xC.1.1	HORVU1Hr1G021070	L-gulonolactone oxidase 2	1H	84054562	84056795	+	No	HC_G	IPR016166,IPR016167,IPR016169,IPR006094,IPR007173,IPR010030	GO:0016491,GO:0016614,GO:0050660,GO:0055114,GO:0003824,GO:0003885,GO:0016020
QFD.73xC.1.1	HORVU1Hr1G021080	Retrotransposon protein, putative, unclassified	1H	84146257	84146532	+	No	LC_TE	IPR025724	-
QFD.73xC.1.1	HORVU1Hr1G021090	Retrovirus-related Pol polyprotein from transposon TNT 1-94	1H	84146710	84147535	+	No	LC_TE	IPR001584,IPR012337	GO:0003676,GO:0015074
QFD.73xC.1.1	HORVU1Hr1G021100	Glutaredoxin family protein	1H	84261800	84263472	-	No	HC_G	IPR002109,IPR012336	GO:0009055,GO:0015035,GO:0045454
QFD.73xC.1.1	HORVU1Hr1G021110	unknown function	1H	84267064	84267207	+	No	LC_TE	IPR019557	-
QFD.73xC.1.1	HORVU1Hr1G021120	4-hydroxy-tetrahydrodipicolinate reductase	1H	84326638	84338957	+	No	HC_G	IPR022663,IPR000846,IPR011859,IPR016040	GO:0070402,GO:0008839,GO:0009089,GO:0055114
QFD.73xC.1.1	HORVU1Hr1G021130	Asparagine--tRNA ligase	1H	84343681	84347935	+	No	HC_G	IPR004365,IPR004522,IPR006195,IPR009068,IPR012340,IPR000738,IPR002312,IPR004364	GO:0004816,GO:0005524,GO:0005737,GO:0006418,GO:0006421,GO:0000166,GO:0003676,GO:0004812
QFD.73xC.1.1	HORVU1Hr1G021140	Glutathione S-transferase family protein	1H	84348112	84349441	+	No	HC_G	IPR012336,IPR004045,IPR004046,IPR010987	GO:0005515
QFD.73xC.1.1	HORVU1Hr1G021150	Glutathione S-transferase family protein	1H	84399076	84400190	+	No	HC_G	IPR012336,IPR004045,IPR004046,IPR010987	GO:0005515
QFD.73xC.1.1	HORVU1Hr1G021160	Glutathione S-transferase family protein	1H	84405715	84407984	+	No	HC_G	IPR012336,IPR004045,IPR004046,IPR010987	GO:0005515
QFD.73xC.1.1	HORVU1Hr1G021170	Glutathione S-transferase family protein	1H	84414501	84415817	+	No	HC_G	IPR012336,IPR004045,IPR004046,IPR010987	GO:0005515
QFD.73xC.1.1	HORVU1Hr1G021180	Glutathione S-transferase family protein	1H	84464305	84465425	+	No	HC_G	IPR012336,IPR004045,IPR004046,IPR010987	GO:0005515
QFD.73xC.1.1	HORVU1Hr1G021190	Serine/threonine-protein phosphatase 2A regulatory subunit B'' subunit gamma	1H	85081952	85093686	-	No	HC_G	IPR002048,IPR011992,IPR018247	GO:0005509
QFD.73xC.1.1	HORVU1Hr1G021200	unknown function	1H	85084736	85085158	+	No	LC_TE	IPR001969,IPR021109	GO:0004190,GO:0006508
QFD.73xC.1.1	HORVU1Hr1G021210	Retrotransposon protein, putative, unclassified, expressed	1H	85087157	85088339	+	No	LC_TE	IPR016197,IPR023780,IPR000953,IPR001584,IPR012337	GO:0003676,GO:0015074
QFD.73xC.1.1	HORVU1Hr1G021220	undescribed protein	1H	85289592	85290082	+	No	LC_u	-	-
QFD.73xC.1.1	HORVU1Hr1G021230	Anaphase-promoting complex subunit 7	1H	85356671	85366890	+	No	HC_G	IPR011990,IPR018708	GO:0005515
QFD.73xC.1.1	HORVU1Hr1G021240	undescribed protein	1H	85510250	85510843	-	No	LC_u	-	-
QFD.73xC.1.1	HORVU1Hr1G021250	Transducin family protein / WD-40 repeat family protein	1H	85510486	85511891	+	No	HC_G	IPR015943,IPR017986	GO:0005515
QFD.73xC.1.1	HORVU1Hr1G021260	undescribed protein	1H	85512850	85513337	+	No	LC_u	-	-
QFD.73xC.1.1	HORVU1Hr1G021270	Polynucleotidyl transferase, ribonuclease H-like superfamily protein	1H	85767504	85767905	-	No	LC_TE	IPR012337	GO:0003676
QFD.73xC.1.1	HORVU1Hr1G021280	unknown function	1H	85782500	85782872	+	No	LC_TE	IPR026960	-
QFD.73xC.1.1	HORVU1Hr1G021290	Transposon protein, putative, CACTA, En/Spm sub-class, expressed	1H	85938830	85943960	+	No	LC_TE	IPR004242,IPR025452	-
QFD.73xC.1.1	HORVU1Hr1G021300	undescribed protein	1H	85938850	85941711	-	No	LC_u	-	-
QFD.73xC.1.1	HORVU1Hr1G021310	undescribed protein	1H	85943730	85945012	-	No	LC_u	-	-
QFD.73xC.1.1	HORVU1Hr1G021320	Retrotransposon protein, putative, unclassified	1H	86046104	86046685	-	No	LC_TE	-	-
QFD.73xC.1.1	HORVU1Hr1G021330	undescribed protein	1H	86066103	86066389	+	No	LC_u	-	-
QFD.73xC.1.1	HORVU1Hr1G021340	Plant protein of unknown function (DUF247)	1H	86127091	86130369	+	No	HC_U	IPR004158	-
QFD.73xC.1.1	HORVU1Hr1G021350	undescribed protein	1H	86131357	86131715	-	No	LC_u	-	-
QFD.73xC.1.1	HORVU1Hr1G021360	undescribed protein	1H	86133282	86134044	+	No	LC_u	-	-
QFD.73xC.1.1	HORVU1Hr1G021370	UPF0001 protein YBL036C	1H	86134641	86146396	+	No	LC_U	IPR001608,IPR011078,IPR029066	-
QFD.73xC.1.1	HORVU1Hr1G021380	unknown function	1H	86142150	86142572	-	No	LC_TE	IPR001969,IPR021109	GO:0004190,GO:0006508
QFD.73xC.1.1	HORVU1Hr1G021390	Disease resistance protein	1H	86146478	86156255	-	No	HC_G	IPR002182,IPR027417,IPR032675	GO:0043531
QFD.73xC.1.1	HORVU1Hr1G021400	undescribed protein	1H	86157679	86158122	+	No	LC_u	-	-
QFD.73xC.1.1	HORVU1Hr1G021410	zinc-finger protein 2	1H	86184935	86185458	-	No	HC_TE?	IPR007087,IPR015880	GO:0046872
QFD.73xC.1.1	HORVU1Hr1G021420	undescribed protein	1H	86200672	86200871	+	No	LC_u	-	-
QFD.73xC.1.1	HORVU1Hr1G021430	undescribed protein	1H	86247497	86252155	-	No	LC_u	-	-
QFD.73xC.1.1	HORVU1Hr1G021440	undescribed protein	1H	86247497	86252155	+	No	LC_u	-	-
QFD.73xC.1.1	HORVU1Hr1G021450	undescribed protein	1H	86249166	86250163	+	No	LC_u	-	-
QFD.73xC.1.1	HORVU1Hr1G021460	undescribed protein	1H	86254909	86271149	+	No	LC_u	-	-
QFD.73xC.1.1	HORVU1Hr1G021470	undescribed protein	1H	86255226	86257052	-	No	LC_u	-	-
QFD.73xC.1.1	HORVU1Hr1G021480	undescribed protein	1H	86270964	86271278	-	No	LC_u	-	-
QFD.73xC.1.1	HORVU1Hr1G021490	E3 ubiquitin-protein ligase RING1-like protein	1H	86311425	86313383	+	No	HC_G	-	-
QFD.73xC.1.1	HORVU1Hr1G021500	undescribed protein	1H	86324142	86327152	-	No	LC_u	-	-
QFD.73xC.1.1	HORVU1Hr1G021510	undescribed protein	1H	86324142	86327152	+	No	LC_u	-	-
QFD.73xC.1.1	HORVU1Hr1G021520	undescribed protein	1H	86375859	86376881	+	No	LC_u	-	-
QFD.73xC.1.1	HORVU1Hr1G021530	Double-stranded RNA-binding protein 2	1H	86411786	86416434	+	No	HC_G	IPR014720	-
QFD.73xC.1.1	HORVU1Hr1G021540	chromatin-remodeling protein 11	1H	86417388	86428500	-	No	HC_G	IPR009057,IPR014001,IPR015194,IPR015195,IPR017884,IPR027417,IPR000330,IPR001005,IPR001650	GO:0005634,GO:0006338,GO:0016818,GO:0031491,GO:0043044,GO:0003676,GO:0003677,GO:0005524
QFD.73xC.1.1	HORVU1Hr1G021550	Transport inhibitor response 1-like protein	1H	86789397	86795743	-	No	HC_G	IPR001810,IPR006553,IPR032675	GO:0005515
QFD.73xC.1.1	HORVU1Hr1G021560	ATP-dependent RNA helicase DeaD	1H	87332393	87349620	+	No	HC_TE?	IPR011991,IPR014001,IPR027417,IPR032284,IPR001650,IPR004589,IPR011545	GO:0008026,GO:0003676,GO:0005524,GO:0006310
QFD.73xC.1.1	HORVU1Hr1G021570	undescribed protein	1H	87343263	87344428	-	No	LC_u	-	-
QFD.73xC.1.1	HORVU1Hr1G021580	undescribed protein	1H	87347519	87348113	-	No	LC_u	-	-
QFD.73xC.1.1	HORVU1Hr1G021590	Glycogen synthase	1H	87474794	87484696	+	No	HC_G	IPR013534,IPR001296,IPR005085,IPR011835	GO:0004373,GO:2001070
QFD.73xC.1.1	HORVU1Hr1G021600	Lipoamide acyltransferase component of branched-chain alpha-keto acid dehydrogenase complex, mitochondrial	1H	87552658	87558379	-	No	HC_G	IPR000089,IPR003016,IPR011053	-
QFD.73xC.1.1	HORVU1Hr1G021610	undescribed protein	1H	87552708	87554656	+	No	LC_u	-	-
QFD.73xC.1.1	HORVU1Hr1G021620	Heavy metal transport/detoxification superfamily protein	1H	87942726	87945212	+	No	HC_G	IPR006121	GO:0030001,GO:0046872
QFD.73xC.1.1	HORVU1Hr1G021630	Protein kinase superfamily protein	1H	87981669	87982939	-	No	HC_G	IPR011009,IPR017441,IPR000719,IPR002290,IPR008271	GO:0004672,GO:0005524,GO:0006468
QFD.73xC.1.1	HORVU1Hr1G021640	Protein kinase superfamily protein	1H	88006188	88007260	+	No	HC_G	IPR011009,IPR017441,IPR000719,IPR002290,IPR008271	GO:0004672,GO:0005524,GO:0006468
QFD.73xC.1.1	HORVU1Hr1G021650	Pathogenesis-related thaumatin superfamily protein	1H	88073421	88075764	+	No	HC_G	IPR001938	-
QFD.73xC.1.1	HORVU1Hr1G021660	D111/G-patch domain-containing protein	1H	88167770	88167892	-	No	HC_G	-	-
QFD.73xC.1.1	HORVU1Hr1G021670	Polyprotein	1H	88335858	88336492	-	No	LC_TE	IPR025724	-
QFD.73xC.1.1	HORVU1Hr1G021680	Cytochrome P450 superfamily protein	1H	88346056	88349305	-	No	HC_G	IPR001128,IPR002401,IPR017972	GO:0055114,GO:0005506,GO:0016705,GO:0020037
QFD.73xC.1.1	HORVU1Hr1G021690	Bifunctional protein FolD 2	1H	88534244	88536950	+	No	HC_G	IPR020631,IPR020867,IPR000672,IPR016040,IPR020630	GO:0055114,GO:0003824,GO:0004488,GO:0009396
QFD.73xC.1.1	HORVU1Hr1G021700	Histidine--tRNA ligase	1H	88537485	88579970	-	No	HC_G	IPR008948,IPR015807,IPR001106,IPR004154,IPR006195	GO:0005524,GO:0006418,GO:0006427,GO:0003824,GO:0004812,GO:0004821
QFD.73xC.1.1	HORVU1Hr1G021710	unknown protein	1H	88877827	88878976	+	No	HC_U
QFD.73xC.1.1	HORVU1Hr1G021720	40S ribosomal protein S4	1H	88880792	88883398	+	No	HC_G	IPR013843,IPR013845,IPR018199,IPR032277,IPR000876,IPR002942,IPR005824	GO:0005840,GO:0006412,GO:0003723,GO:0003735,GO:0005622
QFD.73xC.1.1	HORVU1Hr1G021730	Desiccation-related protein PCC13-62	1H	88883599	88885079	-	No	HC_G	-	-
QFD.73xC.1.1	HORVU1Hr1G021740	Cysteine-rich receptor-like protein kinase 26	1H	88887229	88887633	+	No	HC_G	-	-
QFD.73xC.1.1	HORVU1Hr1G021750	TSPO(outer membrane tryptophan-rich sensory protein)-related	1H	88953586	88959670	-	No	HC_G	-	-
QFD.73xC.1.1	HORVU1Hr1G021760	BTB-POZ and MATH domain 2	1H	89124090	89126535	+	No	HC_G	IPR011333,IPR000210,IPR002083,IPR008974	GO:0005515
QFD.73xC.1.1	HORVU1Hr1G021770	undescribed protein	1H	89126983	89128242	-	No	LC_u	-	-
QFD.73xC.1.1	HORVU1Hr1G021780	Rubber elongation factor protein (REF)	1H	89129056	89132430	-	No	HC_G	IPR008802	-
QFD.73xC.1.1	HORVU1Hr1G021790	Chromosome 3B, genomic scaffold, cultivar Chinese Spring	1H	89129291	89129609	+	No	HC_G	IPR011759	GO:0016021,GO:0022900
QFD.73xC.1.1	HORVU1Hr1G021800	NAC domain protein,	1H	89133143	89136676	+	No	HC_G	IPR003441	GO:0003677,GO:0006355
QFD.73xC.1.1	HORVU1Hr1G021810	Chromosome 3B, genomic scaffold, cultivar Chinese Spring	1H	89138468	89139805	+	No	HC_U	-	-
QFD.73xC.1.1	HORVU1Hr1G021820	undescribed protein	1H	89175758	89176402	-	No	LC_u	-	-
QFD.73xC.1.1	HORVU1Hr1G021830	Cytochrome b6-f complex subunit 4	1H	89179595	89180003	+	No	HC_G	IPR005798,IPR005870	GO:0016491,GO:0042651,GO:0045156,GO:0009055,GO:0009767,GO:0016020
QFD.73xC.1.1	HORVU1Hr1G021840	Translocase of chloroplast 159, chloroplastic	1H	89367119	89372322	+	No	HC_G	IPR027417,IPR005690,IPR006703,IPR024283	GO:0005525,GO:0016817
QFD.73xC.1.1	HORVU1Hr1G021850	undescribed protein	1H	89369308	89369547	-	No	LC_u	-	-
QFD.73xC.1.1	HORVU1Hr1G021860	-	1H	89450968	89451118	.	No	-	-	-
QFD.73xC.1.1	HORVU1Hr1G021870	unknown function	1H	89562232	89563569	-	No	LC_U	-	-
QFD.73xC.1.1	HORVU1Hr1G021880	E3 ubiquitin-protein ligase	1H	89563658	89564997	+	No	HC_G	IPR008974,IPR013083	GO:0005515
QFD.73xC.1.1	HORVU1Hr1G021890	Core-2/I-branching beta-1,6-N-acetylglucosaminyltransferase family protein	1H	89603397	89606493	-	No	HC_G	IPR003406	GO:0008375,GO:0016020
QFD.73xC.1.1	HORVU1Hr1G021900	Major facilitator superfamily protein	1H	89784104	89790207	-	No	HC_G	IPR005828,IPR020846	GO:0016021,GO:0022857,GO:0055085
QFD.73xC.1.1	HORVU1Hr1G021910	undescribed protein	1H	89784355	89785234	-	No	LC_u	-	-
QFD.73xC.1.1	HORVU1Hr1G021920	myb domain protein 98	1H	89981736	89992464	+	No	HC_G	IPR001005,IPR009057,IPR017930	GO:0003677
QFD.73xC.1.1	HORVU1Hr1G021930	villin-like 1	1H	90008925	90015266	-	No	HC_G	IPR007122,IPR007123,IPR029006	GO:0003779
QFD.73xC.1.1	HORVU1Hr1G021940	undescribed protein	1H	90014868	90015144	+	No	LC_u	-	-
QFD.73xC.1.1	HORVU1Hr1G021950	undescribed protein	1H	90641764	90643238	-	No	LC_u	-	-
QFD.73xC.1.1	HORVU1Hr1G021960	Transposable element protein, putative	1H	90696746	90698724	-	No	LC_TE	-	-
QFD.73xC.1.1	HORVU1Hr1G021970	undescribed protein	1H	90698796	90700588	-	No	LC_u	-	-
QFD.73xC.1.1	HORVU1Hr1G021980	undescribed protein	1H	90706322	90706581	+	No	LC_u	-	-
QFD.73xC.1.1	HORVU1Hr1G021990	XH/XS domain-containing protein	1H	90973554	90992122	+	No	HC_G	IPR005379,IPR005380,IPR005381	GO:0031047
QFD.73xC.1.1	HORVU1Hr1G022000	Factor of DNA methylation 1	1H	90997399	90997943	-	No	HC_G	IPR005379	-
QFD.73xC.1.1	HORVU1Hr1G022010	undescribed protein	1H	91113422	91113796	+	No	HC_G	IPR000515	GO:0006810,GO:0016020
QFD.73xC.1.1	HORVU1Hr1G022020	alpha/beta-Hydrolases superfamily protein	1H	91598656	91603353	+	No	HC_G	IPR002921,IPR029058	GO:0006629
QFD.73xC.1.1	HORVU1Hr1G022030	unknown function	1H	91832305	91832724	+	No	LC_TE	IPR004332	-
QFD.73xC.1.1	HORVU1Hr1G022040	unknown function	1H	91833450	91833672	+	No	HC_U	-	-
QFD.73xC.1.1	HORVU1Hr1G022050	Pentatricopeptide repeat-containing protein	1H	91835748	91838731	+	No	HC_G	IPR002885,IPR011990	GO:0005515
QFD.73xC.1.1	HORVU1Hr1G022060	phenylalanine ammonia-lyase 2	1H	91840019	91842898	-	No	HC_G	IPR022313,IPR023144,IPR024083,IPR001106,IPR005922,IPR008948	GO:0016841,GO:0003824,GO:0005737,GO:0006559
QFD.73xC.1.1	HORVU1Hr1G022070	U-box domain-containing protein 38	1H	92200323	92201320	+	No	HC_G	IPR011989	-
QFD.73xC.1.1	HORVU1Hr1G022080	undescribed protein	1H	92315890	92316692	-	No	HC_u	-	-
QFD.73xC.1.1	HORVU1Hr1G022090	undescribed protein	1H	92316072	92334324	+	No	LC_u	-	-
QFD.73xC.1.1	HORVU1Hr1G022100	Gamma-tubulin complex component 4	1H	92414575	92422343	-	No	HC_G	IPR007259	GO:0090063,GO:0000226,GO:0000922,GO:0005815
QFD.73xC.1.1	HORVU1Hr1G022110	Ran guanine nucleotide release factor	1H	92429318	92430854	+	No	HC_G	IPR007681,IPR016123	-
QFD.73xC.1.1	HORVU1Hr1G022120	undescribed protein	1H	92430349	92430838	-	No	LC_u	-	-
QFD.73xC.1.1	HORVU1Hr1G022130	RING/U-box superfamily protein isoform 1	1H	92431710	92440089	-	No	HC_G	IPR001841,IPR013083	GO:0005515,GO:0008270
QFD.73xC.1.1	HORVU1Hr1G022140	undescribed protein	1H	92649409	92658837	-	No	LC_u	-	-
QFD.73xC.1.1	HORVU1Hr1G022150	Oligoribonuclease	1H	92751562	92753092	+	No	HC_G	-	-
QFD.73xC.1.1	HORVU1Hr1G022160	undescribed protein	1H	92923366	92923924	+	No	LC_u	-	-
QFD.73xC.1.1	HORVU1Hr1G022170	Nuclear matrix protein	1H	92982183	92983128	+	No	HC_G	IPR010604	-
QFD.73xC.1.1	HORVU1Hr1G022180	unknown function	1H	92986275	92986412	+	No	HC_U	-	-
QFD.73xC.1.1	HORVU1Hr1G022190	Autophagy protein 5	1H	92993069	92999741	+	No	HC_G	-	-
QFD.73xC.1.1	HORVU1Hr1G022200	undescribed protein	1H	92993069	92999741	-	No	LC_u	-	-
QFD.73xC.1.1	HORVU1Hr1G022210	undescribed protein	1H	93092224	93093000	+	No	LC_u	-	-
QFD.73xC.1.1	HORVU1Hr1G022220	undescribed protein	1H	93092505	93093782	-	No	LC_u	-	-
QFD.73xC.1.1	HORVU1Hr1G022230	unknown function	1H	93260614	93260763	+	No	LC_U	-	-
QFD.73xC.1.1	HORVU1Hr1G022240	undescribed protein	1H	93392968	93396888	+	No	LC_u	-	-
QFD.73xC.1.1	HORVU1Hr1G022250	kinesin-like protein 1	1H	93523369	93554662	+	No	HC_G	IPR001752,IPR027417	GO:0008017,GO:0003777,GO:0005524,GO:0007018
QFD.73xC.1.1	HORVU1Hr1G022260	undescribed protein	1H	93637171	93637677	-	No	LC_u	-	-
QFD.73xC.1.1	HORVU1Hr1G022270	Kinesin-related protein 6	1H	93698275	93699101	-	No	HC_G	IPR001752,IPR019821,IPR027417	GO:0008017,GO:0003777,GO:0005524,GO:0007018
QFD.73xC.1.1	HORVU1Hr1G022280	undescribed protein	1H	93713045	93714289	-	No	LC_u	-	-
QFD.73xC.1.1	HORVU1Hr1G022290	unknown function	1H	93760143	93763447	+	No	HC_U	-	-
QFD.73xC.1.1	HORVU1Hr1G022300	undescribed protein	1H	93773009	93888967	+	No	LC_u	-	-
QFD.73xC.1.1	HORVU1Hr1G022310	non-specific phospholipase C1	1H	93773113	93889030	-	No	HC_G	IPR007312	GO:0016788
QFD.73xC.1.1	HORVU1Hr1G022320	Gag/pol	1H	93778172	93779013	-	No	LC_TE	IPR001584,IPR012337	GO:0003676,GO:0015074
QFD.73xC.1.1	HORVU1Hr1G022330	unknown function	1H	93780012	93780811	-	No	LC_TE	IPR029472	-
QFD.73xC.1.1	HORVU1Hr1G022340	undescribed protein	1H	93790917	93791342	+	No	LC_u	-	-
QFD.73xC.1.1	HORVU1Hr1G022350	undescribed protein	1H	93791782	93792701	+	No	LC_u	-	-
QFD.73xC.1.1	HORVU1Hr1G022360	undescribed protein	1H	93861845	93862313	+	No	LC_u	-	-
QFD.73xC.1.1	HORVU1Hr1G022370	serine/threonine protein phosphatase 2A	1H	94326697	94334261	+	No	HC_G	IPR031675,IPR004843,IPR006186,IPR029052	GO:0016787
QFD.73xC.1.1	HORVU1Hr1G022380	nodulin MtN21 /EamA-like transporter family protein	1H	94568086	94570047	-	No	HC_G	IPR000620	GO:0016020,GO:0016021
QFD.73xC.1.1	HORVU1Hr1G022390	Histone superfamily protein	1H	94904006	94904895	-	No	HC_G	IPR001951,IPR009072,IPR019809	GO:0006334,GO:0046982,GO:0000786,GO:0003677,GO:0005634
QFD.73xC.1.1	HORVU1Hr1G022400	Histone superfamily protein	1H	94907188	94908511	-	No	HC_G	IPR000164,IPR007125,IPR009072	GO:0000786,GO:0003677,GO:0046982
QFD.73xC.1.1	HORVU1Hr1G022410	Mediator of RNA polymerase II transcription subunit 28	1H	95028439	95031122	+	No	HC_G	-	-
QFD.73xC.1.1	HORVU1Hr1G022420	U2 small nuclear ribonucleoprotein B	1H	95033668	95037066	-	No	HC_G	IPR000504,IPR012677	GO:0000166,GO:0003676
QFD.73xC.1.1	HORVU1Hr1G022430	Leucine aminopeptidase 1	1H	95052884	95059224	+	No	HC_G	IPR000819	GO:0004177,GO:0005622,GO:0006508
QFD.73xC.1.1	HORVU1Hr1G022440	undescribed protein	1H	95052898	95053586	-	No	LC_u	-	-
QFD.73xC.1.1	HORVU1Hr1G022450	Fatty acid oxidation complex subunit alpha	1H	95359731	95365082	+	No	HC_G	IPR006180,IPR008927,IPR013328,IPR016040,IPR029045,IPR001753,IPR006108,IPR006176	GO:0008152,GO:0016491,GO:0055114,GO:0003824,GO:0003857,GO:0006631
QFD.73xC.1.1	HORVU1Hr1G022460	pentatricopeptide (PPR) repeat-containing protein	1H	95377662	95377934	+	No	HC_G	-	-
QFD.73xC.1.1	HORVU1Hr1G022470	F-box domain containing protein-like	1H	95388867	95390473	+	No	HC_TE?	IPR005174	-
QFD.73xC.1.1	HORVU1Hr1G022480	undescribed protein	1H	95723086	95723612	-	No	LC_u	-	-
QFD.73xC.1.1	HORVU1Hr1G022490	unknown function	1H	95729867	95734147	-	No	LC_U	-	-
QFD.73xC.1.1	HORVU1Hr1G022500	undescribed protein	1H	95736386	95738542	-	No	HC_G	IPR006501	GO:0004857
QFD.73xC.1.1	HORVU1Hr1G022510	Flavin-containing monooxygenase family protein	1H	95758172	95758516	+	No	HC_G	IPR020946,IPR023753	GO:0050661,GO:0055114,GO:0004499,GO:0016491,GO:0050660
QFD.73xC.1.1	HORVU1Hr1G022520	undescribed protein	1H	96060657	96060851	+	No	LC_u	-	-
QFD.73xC.1.1	HORVU1Hr1G022530	Flavin-containing monooxygenase family protein	1H	96131514	96135442	-	No	HC_G	IPR023753,IPR000103,IPR012143,IPR020946	GO:0050661,GO:0055114,GO:0004499,GO:0016491,GO:0050660
QFD.73xC.1.1	HORVU1Hr1G022540	unknown function	1H	96380113	96381513	+	No	HC_U	-	-
QFD.73xC.1.1	HORVU1Hr1G022550	Ethylene receptor 1	1H	96388027	96393952	+	No	HC_G	IPR004358,IPR005467,IPR029016,IPR003018,IPR003594,IPR003661	GO:0016310,GO:0016772,GO:0000155,GO:0005515,GO:0007165
QFD.73xC.1.1	HORVU1Hr1G022560	unknown function	1H	96401560	96402225	-	No	LC_U	-	-
QFD.73xC.1.1	HORVU1Hr1G022570	60S ribosomal protein L18-2	1H	96478835	96482591	-	No	HC_G	IPR021131,IPR021132	GO:0006412,GO:0003735,GO:0005622,GO:0005840
QFD.73xC.1.1	HORVU1Hr1G022580	-	1H	96556876	96557278	-	No	-	-	-
QFD.73xC.1.1	HORVU1Hr1G022590	undescribed protein	1H	96568119	96568882	+	No	LC_u	-	-
QFD.73xC.1.1	HORVU1Hr1G022600	undescribed protein	1H	96568488	96568882	-	No	LC_u	-	-
QFD.73xC.1.1	HORVU1Hr1G022610	undescribed protein	1H	96571128	96571237	+	No	LC_u	-	-
QFD.73xC.1.1	HORVU1Hr1G022620	undescribed protein	1H	96575803	96576785	+	No	HC_u	-	-
QFD.73xC.1.1	HORVU1Hr1G022630	Peroxidase superfamily protein	1H	96609398	96610540	+	No	HC_G	IPR002016,IPR010255,IPR019794	GO:0055114,GO:0004601,GO:0006979,GO:0020037
QFD.73xC.1.1	HORVU1Hr1G022640	undescribed protein	1H	96919867	96920140	-	No	LC_u	-	-
QFD.73xC.1.1	HORVU1Hr1G022650	hAT transposon superfamily protein	1H	96935095	96938824	-	No	LC_TE	IPR007021,IPR012337	GO:0003676
QFD.73xC.1.1	HORVU1Hr1G022660	Chlororespiratory reduction31	1H	96997292	96998314	-	No	HC_G	IPR021659	-
QFD.73xC.1.1	HORVU1Hr1G022670	Flavin-containing monooxygenase family protein	1H	97050060	97051647	-	No	HC_G	IPR000103,IPR020946,IPR023753	GO:0050661,GO:0055114,GO:0004499,GO:0016491,GO:0050660
QFD.73xC.1.1	HORVU1Hr1G022680	undescribed protein	1H	97105767	97106009	+	No	HC_u	-	-
QFD.73xC.1.1	HORVU1Hr1G022690	Retrotransposon protein, putative, unclassified	1H	97108000	97108179	+	No	LC_TE	IPR005135	-
QFD.73xC.1.1	HORVU1Hr1G022700	NFU1 iron-sulfur cluster scaffold homolog, mitochondrial	1H	97474149	97481022	-	No	HC_G	IPR001075	GO:0005506,GO:0016226,GO:0051536
QFD.73xC.1.1	HORVU1Hr1G022710	GATA transcription factor 23	1H	97474152	97478514	+	No	HC_G	IPR000679,IPR013088	GO:0043565,GO:0003700,GO:0006355,GO:0008270
QFD.73xC.1.1	HORVU1Hr1G022720	DNA-directed RNA polymerase III subunit RPC4	1H	97479523	97484236	+	No	HC_G	IPR007811	GO:0006383,GO:0003677,GO:0003899,GO:0005666
QFD.73xC.1.1	HORVU1Hr1G022730	undescribed protein	1H	97764388	97765481	+	No	LC_u	-	-
QFD.73xC.1.1	HORVU1Hr1G022740	undescribed protein	1H	97902683	97902870	-	No	LC_u	-	-
QFD.73xC.1.1	HORVU1Hr1G022750	Importin subunit alpha-1b	1H	98022462	98027097	+	No	HC_G	IPR016024,IPR024931,IPR032413,IPR000225,IPR002652,IPR011989	GO:0005737,GO:0006606,GO:0008565,GO:0005488,GO:0005515,GO:0005634
QFD.73xC.1.1	HORVU1Hr1G022760	undescribed protein	1H	98088780	98089107	+	No	LC_u	-	-
QFD.73xC.1.1	HORVU1Hr1G022770	undescribed protein	1H	98104194	98104435	+	No	LC_u	-	-
QFD.73xC.1.1	HORVU1Hr1G022780	unknown function	1H	98549827	98551185	-	No	HC_U	-	-
QFD.73xC.1.1	HORVU1Hr1G022790	Heparan-alpha-glucosaminide N-acetyltransferase	1H	98557721	98564547	+	No	HC_G	IPR012429	-
QFD.73xC.1.1	HORVU1Hr1G022800	BEST Arabidopsis thaliana protein match is: 3'-5' exonuclease domain-containing protein / K homology domain-containing protein / KH domain-containing protein .	1H	98735315	98738810	+	No	HC_G	-	-
QFD.73xC.1.1	HORVU1Hr1G022810	Protein disulfide isomerase-like 2-1	1H	98741192	98744845	-	No	HC_G	IPR013766,IPR017937,IPR005788,IPR011679,IPR012336	GO:0005783,GO:0016853,GO:0045454
QFD.73xC.1.1	HORVU1Hr1G022820	undescribed protein	1H	99063122	99064463	+	No	LC_u	-	-
QFD.73xC.1.1	HORVU1Hr1G022830	Histidyl-tRNA synthetase	1H	99164253	99164540	+	No	HC_G	-	-
QFD.73xC.1.1	HORVU1Hr1G022840	Peroxisomal membrane protein 2	1H	99174025	99176800	+	No	HC_G	IPR007248	GO:0016021
QFD.73xC.1.1	HORVU1Hr1G022850	Serine carboxypeptidase-like 18	1H	99180944	99181454	+	No	LC_TE?	IPR026960	-
QFD.73xC.1.1	HORVU1Hr1G022860	unknown function	1H	99220900	99221193	-	No	LC_TE	IPR001584,IPR012337	GO:0003676,GO:0015074
QFD.73xC.1.1	HORVU1Hr1G022870	unknown function	1H	99299716	99301061	-	No	HC_U	-	-
QFD.73xC.1.1	HORVU1Hr1G022880	unknown function	1H	99301912	99302187	-	No	HC_U	-	-
QFD.73xC.1.1	HORVU1Hr1G022890	undescribed protein	1H	99302155	99302418	+	No	LC_u	-	-
QFD.73xC.1.1	HORVU1Hr1G022900	cellulose synthase-like D3	1H	99317421	99321794	-	No	HC_G	IPR005150,IPR029044	GO:0016020,GO:0016760,GO:0030244
QFD.73xC.1.1	HORVU1Hr1G022910	undescribed protein	1H	99736871	99737494	+	No	LC_u	-	-
QFD.73xC.1.1	HORVU1Hr1G022920	undescribed protein	1H	99746175	99759660	+	No	LC_u	-	-
QFD.73xC.1.1	HORVU1Hr1G022930	undescribed protein	1H	99757342	99759660	-	No	LC_u	-	-
QFD.73xC.1.1	HORVU1Hr1G022940	undescribed protein	1H	99758345	99758640	+	No	LC_u	-	-
QFD.73xC.1.1	HORVU1Hr1G022950	Transposable element protein, putative, Retrotrans_gag	1H	99966903	99969395	-	No	LC_TE	IPR005162	-
QFD.73xC.1.1	HORVU1Hr1G022960	undescribed protein	1H	99969480	99974784	-	No	LC_u	-	-
QFD.73xC.1.1	HORVU1Hr1G022970	undescribed protein	1H	99970686	99974757	+	No	LC_u	-	-
QFD.73xC.1.1	HORVU1Hr1G022980	undescribed protein	1H	99981730	99981934	-	No	LC_u	-	-
QFD.73xC.1.1	HORVU1Hr1G022990	Chaperone protein dnaJ 2	1H	100042603	100068893	+	No	HC_G	IPR018253,IPR001623,IPR002939,IPR008971	GO:0006457,GO:0051082
QFD.73xC.1.1	HORVU1Hr1G023000	Transposon protein, putative, Pong sub-class	1H	100074127	100074780	+	No	LC_TE	IPR006912	GO:0016788
QFD.73xC.1.1	HORVU1Hr1G023010	unknown function	1H	100183756	100184625	-	No	HC_U	-	-
QFD.73xC.1.1	HORVU1Hr1G023020	unknown function	1H	100186934	100187518	-	No	LC_U	-	-
QFD.73xC.1.1	HORVU1Hr1G023030	Tubulin gamma-2 chain	1H	100249061	100261649	+	No	HC_G	IPR008280,IPR017975,IPR018316,IPR023123,IPR000217,IPR002454,IPR003008	GO:0005874,GO:0007017,GO:0007020,GO:0031122,GO:0000930,GO:0003924,GO:0005525
QFD.73xC.1.1	HORVU1Hr1G023040	undescribed protein	1H	100255829	100256231	+	No	LC_TE	IPR001878	GO:0003676,GO:0008270
QFD.73xC.1.1	HORVU1Hr1G023050	undescribed protein	1H	100490049	100490353	-	No	LC_u	-	-
QFD.73xC.1.1	HORVU1Hr1G023060	Dihydrolipoyl dehydrogenase	1H	100490063	100496804	+	No	HC_G	IPR016156,IPR023753,IPR004099,IPR006258,IPR012999	GO:0045454,GO:0050660,GO:0055114,GO:0004148,GO:0016491,GO:0016668
QFD.73xC.1.1	HORVU1Hr1G023070	Serine/threonine-protein phosphatase 4 regulatory subunit 3	1H	100799623	100829276	+	No	HC_G	IPR011989,IPR016024	GO:0005488
QFD.73xC.1.1	HORVU1Hr1G023080	unknown function	1H	100816195	100816574	-	No	LC_TE	IPR001969,IPR021109	GO:0004190,GO:0006508
QFD.73xC.1.1	HORVU1Hr1G023090	undescribed protein	1H	100823985	100824330	+	No	LC_u	-	-
QFD.73xC.1.1	HORVU1Hr1G023100	Pyrophosphate-energized proton pump 1	1H	100906977	100911501	-	No	HC_G	IPR004131	GO:0016020,GO:0004427,GO:0009678,GO:0015992
QFD.73xC.1.1	HORVU1Hr1G023110	undescribed protein	1H	100911707	100912546	-	No	LC_u	-	-
QFD.73xC.1.1	HORVU1Hr1G023120	Endo-1,4-beta-xylanase A	1H	100915616	100918121	+	No	HC_G	IPR013781,IPR017853,IPR001000,IPR003305,IPR008979	GO:0004553,GO:0005975,GO:0016798
QFD.73xC.1.1	HORVU1Hr1G023130	Syntaxin-52	1H	101341395	101342287	-	No	HC_G	-	-
QFD.73xC.1.1	HORVU1Hr1G023140	undescribed protein	1H	101344682	101345483	+	No	LC_u	-	-
QFD.73xC.1.1	HORVU1Hr1G023150	undescribed protein	1H	101345479	101346628	-	No	LC_u	-	-
QFD.73xC.1.1	HORVU1Hr1G023160	Flavin-containing monooxygenase family protein	1H	101367935	101372386	+	No	HC_G	IPR012143,IPR020946,IPR023753	GO:0050661,GO:0055114,GO:0004499,GO:0016491,GO:0050660
QFD.73xC.1.1	HORVU1Hr1G023170	Transcription factor jumonji (jmjC) domain-containing protein	1H	101372852	101379111	-	No	HC_G	IPR001841,IPR003347,IPR018866	GO:0005515,GO:0008270
QFD.73xC.1.1	HORVU1Hr1G023180	undescribed protein	1H	101409419	101409682	-	No	HC_u	-	-
QFD.73xC.1.1	HORVU1Hr1G023190	Senescence/dehydration-associated protein-related	1H	101452725	101453751	-	No	HC_G	-	-
QFD.73xC.1.1	HORVU1Hr1G023200	unknown function	1H	101550678	101551320	+	No	LC_U	-	-
QFD.73xC.1.1	HORVU1Hr1G023210	undescribed protein	1H	101576112	101576640	-	No	LC_u	-	-
QFD.73xC.1.1	HORVU1Hr1G023220	undescribed protein	1H	101577960	101579688	-	No	HC_u	-	-
QFD.73xC.1.1	HORVU1Hr1G023230	undescribed protein	1H	101602250	101602381	+	No	LC_u	-	-
QFD.73xC.1.1	HORVU1Hr1G023240	Mutator protein	1H	101683508	101683678	-	No	LC_TE	-	-
QFD.73xC.1.1	HORVU1Hr1G023250	unknown function	1H	101683881	101684090	-	No	HC_U	-	-
QFD.73xC.1.1	HORVU1Hr1G023260	Adenine nucleotide alpha hydrolases-like superfamily protein	1H	101686483	101692849	+	No	HC_G	IPR006015,IPR006016,IPR014729	GO:0006950
QFD.73xC.1.1	HORVU1Hr1G023270	DNA-directed RNA polymerase II subunit RPB7	1H	101687469	101692767	-	No	HC_G	IPR005576,IPR012340	GO:0003899,GO:0006351
QFD.73xC.1.1	HORVU1Hr1G023280	Senescence/dehydration-associated protein-related	1H	101717893	101718919	+	No	HC_G	-	-
QFD.73xC.1.1	HORVU1Hr1G023290	undescribed protein	1H	101719833	101720509	+	No	LC_u	-	-
QFD.73xC.1.1	HORVU1Hr1G023300	undescribed protein	1H	101886189	101886509	+	No	LC_u	-	-
QFD.73xC.1.1	HORVU1Hr1G023310	undescribed protein	1H	101891073	101892097	-	No	LC_u	-	-
QFD.73xC.1.1	HORVU1Hr1G023320	4Fe-4S ferredoxin, iron-sulfur binding protein	1H	101909394	101914110	+	No	HC_G	IPR017896,IPR017900,IPR021039	-
QFD.73xC.1.1	HORVU1Hr1G023330	undescribed protein	1H	102238858	102239794	+	No	HC_G	IPR011598	GO:0046983
QFD.73xC.1.1	HORVU1Hr1G023340	undescribed protein	1H	102240969	102241418	+	No	LC_u	-	-
QFD.73xC.1.1	HORVU1Hr1G023350	DNA-directed RNA polymerase IV subunit 1	1H	102342822	102355595	-	No	HC_G	IPR007080	GO:0003677,GO:0003899,GO:0006351
QFD.73xC.1.1	HORVU1Hr1G023360	undescribed protein	1H	102352418	102352913	+	No	LC_u	-	-
QFD.73xC.1.1	HORVU1Hr1G023370	General transcription factor 2-related zinc finger protein	1H	102561125	102562651	-	No	LC_TE	IPR012337,IPR025398	GO:0003676
QFD.73xC.1.1	HORVU1Hr1G023380	TTF-type zinc finger protein with HAT dimerisation domain	1H	102562893	102563386	-	No	LC_TE	IPR025398	-
QFD.73xC.1.1	HORVU1Hr1G023390	undescribed protein	1H	102573677	102574435	+	No	LC_u	-	-
QFD.73xC.1.1	HORVU1Hr1G023400	undescribed protein	1H	102851211	102851461	-	No	LC_u	-	-
QFD.73xC.1.1	HORVU1Hr1G023410	undescribed protein	1H	102858764	102859375	-	No	LC_u	-	-
QFD.73xC.1.1	HORVU1Hr1G023420	undescribed protein	1H	103222450	103222656	-	No	LC_u	-	-
QFD.73xC.1.1	HORVU1Hr1G023430	undescribed protein	1H	103512709	103513243	+	No	LC_u	-	-
QFD.73xC.1.1	HORVU1Hr1G023440	undescribed protein	1H	103513527	103513818	+	No	LC_u	-	-
QFD.73xC.1.1	HORVU1Hr1G023450	undescribed protein	1H	103515682	103521237	+	No	LC_u	-	-
QFD.73xC.1.1	HORVU1Hr1G023460	gibberellin 2-oxidase 6	1H	103515686	103524335	-	No	HC_G	IPR005123,IPR027443	GO:0016491,GO:0055114
QFD.73xC.1.1	HORVU1Hr1G023470	undescribed protein	1H	103521298	103521883	+	No	LC_u	-	-
QFD.73xC.1.1	HORVU1Hr1G023480	ubiquitin protein ligase 6	1H	103604299	103619610	+	No	HC_G	IPR000569	GO:0004842
QFD.73xC.1.1	HORVU1Hr1G023490	undescribed protein	1H	103619013	103619597	-	No	LC_u	-	-
QFD.73xC.1.1	HORVU1Hr1G023500	Golgi apparatus membrane protein TVP23 homolog A	1H	103969528	103975489	+	No	HC_G	IPR008564	GO:0016021
QFD.73xC.1.1	HORVU1Hr1G023510	GDSL esterase/lipase	1H	103974787	103980161	-	No	HC_G	IPR001087,IPR013830	GO:0016788
QFD.73xC.1.1	HORVU1Hr1G023520	GDSL esterase/lipase	1H	103980541	104042136	-	No	HC_G	IPR013830	-
QFD.73xC.1.1	HORVU1Hr1G023530	Retrotransposon protein, putative, unclassified	1H	104201468	104202958	+	No	LC_TE	-	-
QFD.73xC.1.1	HORVU1Hr1G023540	undescribed protein	1H	104203076	104203963	+	No	LC_u	-	-
QFD.73xC.1.1	HORVU1Hr1G023550	undescribed protein	1H	104204140	104205614	+	No	LC_u	-	-
QFD.73xC.1.1	HORVU1Hr1G023560	undescribed protein	1H	104206141	104206688	+	No	LC_u	-	-
QFD.73xC.1.1	HORVU1Hr1G023570	Retrotransposon protein, putative, unclassified	1H	104208906	104210048	-	No	LC_TE	-	-
QFD.73xC.1.1	HORVU1Hr1G023580	undescribed protein	1H	104210155	104210862	+	No	LC_u	-	-
QFD.73xC.1.1	HORVU1Hr1G023590	Retrotransposon protein, putative, unclassified, expressed	1H	104210374	104211525	-	No	LC_TE	-	-
QFD.73xC.1.1	HORVU1Hr1G023600	Chromosome 3B, genomic scaffold, cultivar Chinese Spring	1H	104211282	104217192	+	No	LC_U	-	-
QFD.73xC.1.1	HORVU1Hr1G023610	undescribed protein	1H	104211998	104212620	-	No	LC_u	-	-
QFD.73xC.1.1	HORVU1Hr1G023620	MADS-box transcription factor 13	1H	104414916	104421746	-	No	HC_G	IPR002100,IPR002487	GO:0006355,GO:0046983,GO:0003677,GO:0003700,GO:0005634
QFD.73xC.1.1	HORVU1Hr1G023630	Dihydrolipoyl dehydrogenase	1H	104746260	104750117	-	No	HC_G	IPR016156,IPR023753,IPR004099,IPR006258,IPR012999	GO:0045454,GO:0050660,GO:0055114,GO:0004148,GO:0016491,GO:0016668
QFD.73xC.1.1	HORVU1Hr1G023640	Gag protease polyprotein	1H	104847261	104847606	+	No	LC_TE	-	-
QFD.73xC.1.1	HORVU1Hr1G023650	Senescence-associated protein	1H	104873029	104873369	-	No	HC_G	-	-
QFD.73xC.1.1	HORVU1Hr1G023660	ubiquitin 5	1H	104959326	104960914	-	No	HC_G	IPR019954,IPR019956,IPR029071,IPR000626,IPR002906,IPR011332	GO:0006412,GO:0003735,GO:0005515,GO:0005840
QFD.73xC.1.1	HORVU1Hr1G023670	Macrophage erythroblast attacher	1H	104961244	104966628	-	No	HC_G	IPR013144,IPR024964,IPR027370,IPR006594,IPR006595,IPR013083	GO:0005515
QFD.73xC.1.1	HORVU1Hr1G023680	undescribed protein	1H	105005088	105009376	-	No	LC_u	-	-
QFD.73xC.1.1	HORVU1Hr1G023690	GTP pyrophosphokinase	1H	105079564	105083243	+	No	HC_G	IPR011992,IPR018247,IPR002048,IPR003607,IPR007685	GO:0005509,GO:0015969
QFD.73xC.1.1	HORVU1Hr1G023700	undescribed protein	1H	105087361	105087709	+	No	LC_u	-	-
QFD.73xC.1.1	HORVU1Hr1G023710	ATP-dependent DNA helicase PIF1	1H	105089002	105093675	+	No	HC_TE?	IPR010285,IPR027417	GO:0000723,GO:0003678,GO:0006281
QFD.73xC.1.1	HORVU1Hr1G023720	calmodulin like 23	1H	105104635	105105186	-	No	HC_G	IPR002048,IPR011992,IPR018247	GO:0005509
QFD.73xC.1.1	HORVU1Hr1G023730	CCR4-NOT transcription complex subunit 3	1H	105456923	105457931	-	No	HC_G	-	-
QFD.73xC.1.1	HORVU1Hr1G023740	Arogenate dehydratase/prephenate dehydratase 1, chloroplastic	1H	105458147	105459064	-	No	HC_G	-	-
QFD.73xC.1.1	HORVU1Hr1G023750	Peroxidase superfamily protein	1H	105662511	105664061	-	No	HC_G	IPR019793,IPR019794,IPR000823,IPR002016,IPR010255	GO:0055114,GO:0004601,GO:0006979,GO:0020037
QFD.73xC.1.1	HORVU1Hr1G023760	Retrotransposon protein, putative, unclassified	1H	105673975	105674815	+	No	LC_TE	-	-
QFD.73xC.1.1	HORVU1Hr1G023770	DNA helicase	1H	105674851	105675139	+	No	LC_TE?	-	-
QFD.73xC.1.1	HORVU1Hr1G023780	unknown function	1H	105707316	105707753	-	No	LC_U	-	-
QFD.73xC.1.1	HORVU1Hr1G023790	Retrotransposon protein, putative, unclassified, expressed	1H	105714689	105715033	+	No	LC_TE	IPR012337	GO:0003676
QFD.73xC.1.1	HORVU1Hr1G023800	unknown protein	1H	105715284	105726419	-	No	LC_U
QFD.73xC.1.1	HORVU1Hr1G023810	Transposon Ty1-PL Gag-Pol polyprotein	1H	105884759	105886968	-	No	LC_TE	IPR001584,IPR012337,IPR013103	GO:0003676,GO:0015074
QFD.73xC.1.1	HORVU1Hr1G023820	E3 ubiquitin-protein ligase	1H	105889894	105890848	-	No	HC_G	IPR008974,IPR013010,IPR013323	GO:0016567,GO:0004842,GO:0005515,GO:0008270
QFD.73xC.1.1	HORVU1Hr1G023830	undescribed protein	1H	105973560	105973949	+	No	HC_u	-	-
QFD.73xC.1.1	HORVU1Hr1G023840	undescribed protein	1H	106033852	106034540	+	No	HC_G	IPR003614	GO:0006952
QFD.73xC.1.1	HORVU1Hr1G023850	undescribed protein	1H	106101065	106101321	-	No	LC_u	-	-
QFD.73xC.1.1	HORVU1Hr1G023860	Coiled-coil domain containing 55	1H	106103321	106104056	+	No	HC_G	-	-
QFD.73xC.1.1	HORVU1Hr1G023870	Endoribonuclease YbeY	1H	106104972	106106123	-	No	HC_G	IPR002036,IPR023091	GO:0004222,GO:0006364
QFD.73xC.1.1	HORVU1Hr1G023880	undescribed protein	1H	106330754	106331293	+	No	LC_u	-	-
QFD.73xC.1.1	HORVU1Hr1G023890	Retrotransposon protein, putative, Ty1-copia subclass	1H	106488166	106488429	-	No	LC_TE	IPR001878	GO:0003676,GO:0008270
QFD.73xC.1.1	HORVU1Hr1G023900	undescribed protein	1H	106498515	106499384	+	No	LC_u	-	-
QFD.73xC.1.1	HORVU1Hr1G023910	undescribed protein	1H	106500275	106503296	-	No	LC_u	-	-
QFD.73xC.1.1	HORVU1Hr1G023920	undescribed protein	1H	106502606	106507804	+	No	LC_u	-	-
QFD.73xC.1.1	HORVU1Hr1G023930	undescribed protein	1H	106503552	106508023	-	No	LC_u	-	-
QFD.73xC.1.1	HORVU1Hr1G023940	Photosystem II CP47 reaction center protein	1H	106510569	106510711	+	No	HC_G	IPR000932	GO:0016168,GO:0019684,GO:0009521,GO:0009767,GO:0016020
QFD.73xC.1.1	HORVU1Hr1G023950	undescribed protein	1H	106593935	106594068	-	No	LC_u	-	-
QFD.73xC.1.1	HORVU1Hr1G023960	Retinoblastoma-related protein 1	1H	106628543	106629013	-	No	HC_G	-	-
QFD.73xC.1.1	HORVU1Hr1G023970	RNA-directed DNA polymerase (Reverse transcriptase) domain containing protein	1H	106640816	106641211	-	No	LC_TE	-	-
QFD.73xC.1.1	HORVU1Hr1G023980	Reverse transcriptase	1H	106646791	106647931	+	No	LC_TE	-	-
QFD.73xC.1.1	HORVU1Hr1G023990	Retrotransposable element Tf2 155 kDa protein type 1	1H	106811437	106811706	+	No	LC_TE	IPR000953,IPR016197,IPR023780	-
QFD.73xC.1.1	HORVU1Hr1G024000	phosphomannomutase	1H	106882819	106883768	-	No	HC_G	IPR005002,IPR023214	GO:0004615,GO:0005737,GO:0009298
QFD.73xC.1.1	HORVU1Hr1G024010	undescribed protein	1H	106904085	106904270	-	No	LC_TE	IPR021109	-
QFD.73xC.1.1	HORVU1Hr1G024020	undescribed protein	1H	106909298	106909516	-	No	LC_u	-	-
QFD.73xC.1.1	HORVU1Hr1G024030	unknown function	1H	106909766	106916893	-	No	LC_TE	IPR021109	-
QFD.73xC.1.1	HORVU1Hr1G024040	alpha/beta-Hydrolases superfamily protein	1H	106920003	106921070	+	No	HC_G	IPR029058	-
QFD.73xC.1.1	HORVU1Hr1G024050	undescribed protein	1H	106930822	106931240	-	No	HC_u	-	-
QFD.73xC.1.1	HORVU1Hr1G024060	arginine/serine-rich splicing factor 35	1H	107289291	107295231	+	No	HC_TE?	IPR000504,IPR001878,IPR012677	GO:0000166,GO:0003676,GO:0008270
QFD.73xC.1.1	HORVU1Hr1G024070	Protein kinase superfamily protein	1H	107294359	107299123	-	No	HC_G	IPR008271,IPR011009,IPR013320,IPR017441,IPR024788,IPR000719,IPR001245,IPR002290	GO:0004672,GO:0005524,GO:0006468
QFD.73xC.1.1	HORVU1Hr1G024080	unknown function	1H	107307476	107307748	-	No	LC_TE	IPR019557	-
QFD.73xC.1.1	HORVU1Hr1G024090	Pleckstrin homology domain-containing family A member 8	1H	107444533	107444946	-	No	HC_G	-	-
QFD.73xC.1.1	HORVU1Hr1G024100	Divalent ion symporter	1H	107445975	107449220	-	No	HC_G	-	-
QFD.73xC.1.1	HORVU1Hr1G024110	undescribed protein	1H	107467144	107467983	+	No	LC_u	-	-
QFD.73xC.1.1	HORVU1Hr1G024120	undescribed protein	1H	107469193	107471162	+	No	LC_u	-	-
QFD.73xC.1.1	HORVU1Hr1G024130	undescribed protein	1H	107722339	107725894	+	No	LC_u	-	-
QFD.73xC.1.1	HORVU1Hr1G024140	Transcription initiation factor TFIID subunit 13	1H	107887893	107890629	+	No	HC_G	IPR009072	GO:0046982
QFD.73xC.1.1	HORVU1Hr1G024150	Cytochrome P450 superfamily protein	1H	108054985	108064322	-	No	HC_G	IPR001128,IPR002401,IPR017972	GO:0055114,GO:0005506,GO:0016705,GO:0020037
QFD.73xC.1.1	HORVU1Hr1G024160	Mutator protein	1H	108061510	108061704	-	No	LC_TE	IPR019557	-
QFD.73xC.1.1	HORVU1Hr1G024170	Arginine--tRNA ligase	1H	108166411	108190963	+	No	HC_G	IPR008909,IPR009080,IPR014729,IPR001278,IPR001412,IPR005148	GO:0005524,GO:0005737,GO:0006418,GO:0006420,GO:0000166,GO:0004812,GO:0004814
QFD.73xC.1.1	HORVU1Hr1G024180	FASCICLIN-like arabinogalactan-protein 11	1H	108240030	108241571	-	No	HC_G	IPR000782	-
QFD.73xC.1.1	HORVU1Hr1G024190	RING/U-box superfamily protein	1H	108242417	108251272	-	No	HC_G	IPR001841,IPR013083	GO:0005515,GO:0008270
QFD.73xC.1.1	HORVU1Hr1G024200	undescribed protein	1H	108246590	108250978	+	No	LC_u	-	-
QFD.73xC.1.1	HORVU1Hr1G024210	PHD finger protein ALFIN-LIKE 1	1H	108598601	108604330	+	No	HC_G	IPR019786,IPR019787,IPR021998,IPR001965,IPR011011,IPR013083	GO:0042393,GO:0005515,GO:0006355,GO:0008270
QFD.73xC.1.1	HORVU1Hr1G024220	Serine/threonine-protein kinase	1H	109039019	109045407	-	No	HC_G	IPR003609,IPR008271,IPR011009,IPR013320,IPR017441,IPR000719,IPR000858,IPR002290	GO:0048544,GO:0004672,GO:0005524,GO:0006468
QFD.73xC.1.1	HORVU1Hr1G024230	undescribed protein	1H	109039035	109045407	+	No	LC_u	-	-
QFD.73xC.1.1	HORVU1Hr1G024240	Acyl-CoA dehydrogenase	1H	109045587	109055596	-	No	HC_G	IPR009100,IPR013786,IPR006089,IPR006091,IPR009075	GO:0050660,GO:0055114,GO:0003995,GO:0008152,GO:0016627
QFD.73xC.1.1	HORVU1Hr1G024250	unknown function	1H	109047204	109050242	-	No	LC_TE	IPR000477,IPR005162,IPR021109	-
QFD.73xC.1.1	HORVU1Hr1G024260	undescribed protein	1H	109297485	109297592	-	No	LC_TE	IPR009027,IPR011320	-
QFD.73xC.1.1	HORVU1Hr1G024270	Retrotransposon protein, putative, unclassified	1H	109537248	109547160	+	No	LC_TE	IPR005135	-
QFD.73xC.1.1	HORVU1Hr1G024280	Transcription factor bHLH51	1H	109702688	109704573	+	No	HC_G	IPR011598	GO:0046983
QFD.73xC.1.1	HORVU1Hr1G024290	Prolyl 4-hydroxylase 5	1H	109985375	109986289	+	No	HC_G	-	-
QFD.73xC.1.1	HORVU1Hr1G024300	Non-specific serine/threonine protein kinase	1H	110313304	110313531	-	No	HC_G	IPR011009	-
QFD.73xC.1.1	HORVU1Hr1G024310	undescribed protein	1H	110372425	110372635	+	No	LC_u	-	-
QFD.73xC.1.1	HORVU1Hr1G024320	undescribed protein	1H	110395672	110588399	-	No	LC_u	-	-
QFD.73xC.1.1	HORVU1Hr1G024330	TTF-type zinc finger protein with HAT dimerisation domain	1H	110410461	110410743	-	No	LC_TE	IPR008906,IPR012337	GO:0003676,GO:0046983
QFD.73xC.1.1	HORVU1Hr1G024340	undescribed protein	1H	110419576	110420775	-	No	LC_u	-	-
QFD.73xC.1.1	HORVU1Hr1G024350	undescribed protein	1H	110587172	110587546	-	No	LC_u	-	-
QFD.73xC.1.1	HORVU1Hr1G024360	undescribed protein	1H	110587976	110588399	+	No	LC_u	-	-
QFD.73xC.1.1	HORVU1Hr1G024370	undescribed protein	1H	110621932	110625509	+	No	LC_u	-	-
QFD.73xC.1.1	HORVU1Hr1G024380	undescribed protein	1H	111035031	111035605	-	No	LC_u	-	-
QFD.73xC.1.1	HORVU1Hr1G024390	Zinc transporter 6	1H	111047458	111050702	+	No	HC_G	IPR003689,IPR004698	GO:0030001,GO:0046873,GO:0055085,GO:0071577,GO:0005385,GO:0016020,GO:0016021
QFD.73xC.1.1	HORVU1Hr1G024400	6-phosphofructo-2-kinase/fructose-2,6-bisphosphatase	1H	111053076	111064535	-	No	HC_G	IPR013078,IPR013079,IPR013783,IPR013784,IPR027417,IPR029033,IPR001345,IPR002044,IPR003094	GO:0006000,GO:0006003,GO:0008152,GO:0030246,GO:2001070,GO:0003824,GO:0003873,GO:0005524
QFD.73xC.1.1	HORVU1Hr1G024410	undescribed protein	1H	111487237	111487931	+	No	LC_u	-	-
QFD.73xC.1.1	HORVU1Hr1G024420	Asparagine--tRNA ligase	1H	111584929	111590266	-	No	HC_G	IPR002312,IPR004364,IPR006195	GO:0006418,GO:0000166,GO:0004812,GO:0005524
QFD.73xC.1.1	HORVU1Hr1G024430	undescribed protein	1H	112019172	112019523	+	No	LC_u	-	-
QFD.73xC.1.1	HORVU1Hr1G024440	NAM-like protein	1H	112437786	112438178	+	No	HC_G	-	-
QFD.73xC.1.1	HORVU1Hr1G024450	unknown function	1H	112441985	112443826	+	No	LC_TE	IPR005398,IPR007321	-
QFD.73xC.1.1	HORVU1Hr1G024460	Kelch-like protein 1	1H	112794029	112801551	-	No	HC_G	IPR006652,IPR013989,IPR015915	GO:0005515
QFD.73xC.1.1	HORVU1Hr1G024470	undescribed protein	1H	113039515	113040665	-	No	LC_u	-	-
QFD.73xC.1.1	HORVU1Hr1G024480	undescribed protein	1H	113215240	113215468	+	No	LC_u	-	-
QFD.73xC.1.1	HORVU1Hr1G024490	LOB domain-containing protein 13	1H	113482829	113484314	+	No	HC_G	IPR004883	-
QFD.73xC.1.1	HORVU1Hr1G024500	undescribed protein	1H	113484411	113484737	-	No	LC_u	-	-
QFD.73xC.1.1	HORVU1Hr1G024510	GPI-GlcNAc transferase complex, PIG-H component	1H	113485215	113489277	-	No	HC_G	IPR019328	GO:0017176
QFD.73xC.1.1	HORVU1Hr1G024520	undescribed protein	1H	113485998	113486787	+	No	LC_u	-	-
QFD.73xC.1.1	HORVU1Hr1G024530	undescribed protein	1H	113487007	113487936	+	No	LC_u	-	-
QFD.73xC.1.1	HORVU1Hr1G024540	Chromosome 3B, genomic scaffold, cultivar Chinese Spring	1H	113714751	113716149	+	No	HC_U	-	-
QFD.73xC.1.1	HORVU1Hr1G024550	AP-4 complex subunit sigma	1H	113802636	113803125	+	No	HC_G	IPR011012,IPR022775	GO:0006810
QFD.73xC.1.1	HORVU1Hr1G024560	undescribed protein	1H	114018574	114019116	+	No	LC_u	-	-
QFD.73xC.1.1	HORVU1Hr1G024570	undescribed protein	1H	114019236	114020377	+	No	LC_u	-	-
QFD.73xC.1.1	HORVU1Hr1G024580	haloacid dehalogenase-like hydrolase family protein	1H	114023249	114026649	+	No	HC_G	IPR023214	-
QFD.73xC.1.1	HORVU1Hr1G024590	undescribed protein	1H	114038506	114040309	-	No	LC_u	-	-
QFD.73xC.1.1	HORVU1Hr1G024600	unknown function	1H	114227713	114228027	+	No	LC_U	-	-
QFD.73xC.1.1	HORVU1Hr1G024610	Retrotransposon protein, putative, unclassified	1H	114234464	114234658	+	No	LC_TE	-	-
QFD.73xC.1.1	HORVU1Hr1G024620	2,3-bisphosphoglycerate-independent phosphoglycerate mutase	1H	114235091	114235243	+	No	HC_G	-	-
QFD.73xC.1.1	HORVU1Hr1G024630	unknown function	1H	114237362	114237550	-	No	LC_U	-	-
QFD.73xC.1.1	HORVU1Hr1G024640	Kinase interacting (KIP1-like) family protein	1H	114810823	114815858	+	No	HC_G	IPR011684	-
QFD.73xC.1.1	HORVU1Hr1G024650	undescribed protein	1H	114850937	114851197	-	No	LC_u	-	-
QFD.73xC.1.1	HORVU1Hr1G024660	Nucleotide/sugar transporter family protein	1H	114851140	114855324	+	No	HC_G	IPR004853	-
QFD.73xC.1.1	HORVU1Hr1G024670	response to oxidative stress	1H	114851474	114862830	-	No	HC_G	-	-
QFD.73xC.1.1	HORVU1Hr1G024680	unknown function	1H	115302883	115310202	+	No	LC_TE	IPR007321	-
QFD.73xC.1.1	HORVU1Hr1G024690	undescribed protein	1H	115310570	115311587	+	No	LC_u	-	-
QFD.73xC.1.1	HORVU1Hr1G024700	Thioredoxin superfamily protein	1H	115486723	115488308	-	No	HC_G	IPR012336,IPR013766,IPR017937	GO:0045454
QFD.73xC.1.1	HORVU1Hr1G024710	60S ribosomal protein L10-2	1H	115706038	115708321	+	No	HC_G	IPR001197,IPR016180,IPR018255	GO:0006412,GO:0003735,GO:0005622,GO:0005840
QFD.73xC.1.1	HORVU1Hr1G024720	-	1H	115706126	115706211	.	No	-	-	-
QFD.73xC.1.1	HORVU1Hr1G024730	undescribed protein	1H	115708607	115709035	-	No	LC_u	-	-
QFD.73xC.1.1	HORVU1Hr1G024740	RING finger protein 145	1H	115708752	115713008	+	No	HC_G	IPR001841,IPR013083,IPR017907	GO:0005515,GO:0008270
QFD.73xC.1.1	HORVU1Hr1G024750	Thioredoxin-like 3-1, chloroplastic	1H	116223807	116224691	+	No	HC_G	IPR012336,IPR013766	GO:0045454
QFD.73xC.1.1	HORVU1Hr1G024760	undescribed protein	1H	116385369	116385905	+	No	LC_u	-	-
QFD.73xC.1.1	HORVU1Hr1G024770	Thioredoxin H1	1H	116387863	116388749	-	No	HC_G	IPR012336,IPR013766	GO:0045454
QFD.73xC.1.1	HORVU1Hr1G024780	undescribed protein	1H	116525363	116527265	-	No	LC_u	-	-
QFD.73xC.1.1	HORVU1Hr1G024790	-	1H	116563068	116566183	-	No	-	-	-
QFD.73xC.1.1	HORVU1Hr1G024800	unknown function	1H	116828743	116828937	-	No	HC_U	-	-
QFD.73xC.1.1	HORVU1Hr1G024810	DNA-directed RNA polymerase subunit L	1H	116956340	116968562	+	No	HC_G	IPR008193,IPR009025	GO:0046983,GO:0003677,GO:0003899,GO:0006351
QFD.73xC.1.1	HORVU1Hr1G024820	unknown function	1H	116959757	116959997	-	No	LC_TE	IPR026960	-
QFD.73xC.1.1	HORVU1Hr1G024830	Retrotransposon protein, putative, unclassified	1H	116961490	116962025	-	No	LC_TE	-	-
QFD.73xC.1.1	HORVU1Hr1G024840	undescribed protein	1H	116964501	116965249	-	No	LC_u	-	-
QFD.73xC.1.1	HORVU1Hr1G024850	undescribed protein	1H	116968788	116969533	-	No	LC_u	-	-
QFD.73xC.1.1	HORVU1Hr1G024860	arabinogalactan protein 16	1H	116968884	116969646	+	No	HC_G	IPR009424	-
QFD.73xC.1.1	HORVU1Hr1G024870	Glycerophosphodiester phosphodiesterase 1	1H	117662362	117665336	-	No	HC_G	IPR017946,IPR030395	GO:0006629,GO:0008081
QFD.73xC.1.1	HORVU1Hr1G024880	unknown function	1H	117947664	117948156	+	No	HC_U	-	-
QFD.73xC.1.1	HORVU1Hr1G024890	NAD(P)H dehydrogenase 18	1H	117975467	117976315	-	No	HC_G	-	-
QFD.73xC.1.1	HORVU1Hr1G024900	Lysine-specific demethylase REF6	1H	118038063	118038452	-	No	HC_TE?	IPR013087	GO:0003676
QFD.73xC.1.1	HORVU1Hr1G024910	undescribed protein	1H	118038486	118038913	+	No	LC_u	-	-
QFD.73xC.1.1	HORVU1Hr1G024920	Retrotransposon protein, putative, Ty1-copia subclass	1H	118176614	118177280	+	No	LC_TE	-	-
QFD.73xC.1.1	HORVU1Hr1G024930	unknown function	1H	118242048	118242867	-	No	LC_U	-	-
QFD.73xC.1.1	HORVU1Hr1G024940	Transposon protein, putative, CACTA, En/Spm sub-class	1H	118249214	118249992	-	No	LC_TE	IPR004242	-
QFD.73xC.1.1	HORVU1Hr1G024950	unknown function	1H	118250197	118250892	-	No	LC_TE	IPR029480	-
QFD.73xC.1.1	HORVU1Hr1G024960	unknown function	1H	118331322	118332017	+	No	LC_TE	IPR029480	-
QFD.73xC.1.1	HORVU1Hr1G024970	Transposon protein, putative, CACTA, En/Spm sub-class	1H	118332222	118333000	+	No	LC_TE	IPR004242	-
QFD.73xC.1.1	HORVU1Hr1G024980	unknown function	1H	118333905	118334724	+	No	LC_U	-	-
QFD.73xC.1.1	HORVU1Hr1G024990	tryptophan aminotransferase related 2	1H	118627419	118633245	+	No	HC_G	IPR015422,IPR015424,IPR006947,IPR006948,IPR015421	GO:0003824,GO:0016846
QFD.73xC.1.1	HORVU1Hr1G025000	undescribed protein	1H	118891179	118891645	+	No	LC_u	-	-
QFD.73xC.1.1	HORVU1Hr1G025010	NAC domain containing protein 82	1H	118905140	118912027	+	No	HC_G	IPR003441	GO:0003677,GO:0006355
QFD.73xC.1.1	HORVU1Hr1G025020	Tryptophan aminotransferase 1	1H	118930008	118936277	-	No	HC_G	IPR010820	-
QFD.73xC.1.1	HORVU1Hr1G025030	villin-like 1	1H	119172407	119175073	+	No	HC_G	IPR007122,IPR007123,IPR029006	GO:0003779
QFD.73xC.1.1	HORVU1Hr1G025040	receptor-like protein kinase 2	1H	119370519	119378506	-	No	HC_G	IPR003591,IPR008271,IPR011009,IPR017441,IPR032675,IPR000719,IPR001611,IPR002290	GO:0006468,GO:0004672,GO:0005515,GO:0005524
QFD.73xC.1.1	HORVU1Hr1G025050	undescribed protein	1H	119390529	119391518	+	No	LC_u	-	-
QFD.73xC.1.1	HORVU1Hr1G025060	NADH-ubiquinone oxidoreductase chain 1	1H	119684607	119903379	-	No	HC_G	IPR001694	GO:0016020,GO:0055114
QFD.73xC.1.1	HORVU1Hr1G025070	CcmFC	1H	119694195	119695018	+	No	HC_G	-	-
QFD.73xC.1.1	HORVU1Hr1G025080	CcmFC	1H	119695903	119696394	+	No	HC_G	-	-
QFD.73xC.1.1	HORVU1Hr1G025090	30S ribosomal protein S7	1H	119712992	119714432	-	No	HC_G	IPR000235,IPR005717,IPR023798	GO:0003735,GO:0006412,GO:0015935
QFD.73xC.1.1	HORVU1Hr1G025100	NADH-quinone oxidoreductase subunit C	1H	119757607	119758317	+	No	HC_G	IPR001268	GO:0008137,GO:0055114
QFD.73xC.1.1	HORVU1Hr1G025110	NADH-ubiquinone oxidoreductase chain 3	1H	119759007	119759471	+	No	HC_G	IPR000440	GO:0008137,GO:0055114
QFD.73xC.1.1	HORVU1Hr1G025120	Cytochrome c oxidase subunit 1	1H	119884855	119886434	-	No	HC_G	IPR000883,IPR023615,IPR023616	GO:0009060,GO:0016021,GO:0020037,GO:0055114,GO:0004129,GO:0005506,GO:0009055
QFD.73xC.1.1	HORVU1Hr1G025130	Protein of Unknown Function (DUF239)	1H	119924134	119930547	-	No	LC_U	IPR004314,IPR025521	-
QFD.73xC.1.1	HORVU1Hr1G025140	Retrotransposon protein, putative, Ty1-copia subclass	1H	119928669	119929970	+	No	LC_TE	-	-
QFD.73xC.1.1	HORVU1Hr1G025150	Pyruvate dehydrogenase E1 component subunit beta	1H	120373212	120376223	+	No	HC_G	IPR005475,IPR009014,IPR029061	GO:0003824,GO:0008152
QFD.73xC.1.1	HORVU1Hr1G025160	DNA-directed RNA polymerase subunit A'	1H	120864470	120897403	+	No	HC_G	IPR007080,IPR000722,IPR006592,IPR007066	GO:0003677,GO:0003899,GO:0006351
QFD.73xC.1.1	HORVU1Hr1G025170	Retrotransposon protein, putative, unclassified	1H	120881076	120881339	-	No	LC_TE	-	-
QFD.73xC.1.1	HORVU1Hr1G025180	unknown function	1H	120882534	120882803	-	No	LC_U	-	-
QFD.73xC.1.1	HORVU1Hr1G025190	Chlorophyll synthase, chloroplastic	1H	120883425	120883595	-	No	HC_G	-	-
QFD.73xC.1.1	HORVU1Hr1G025200	O-methyltransferase ZRP4	1H	120883819	120883962	-	No	HC_G	-	-
QFD.73xC.1.1	HORVU1Hr1G025210	unknown function	1H	120888042	120888332	-	No	LC_TE	IPR026960	-
QFD.73xC.1.1	HORVU1Hr1G025220	undescribed protein	1H	121242018	121242363	+	No	LC_u	-	-
QFD.73xC.1.1	HORVU1Hr1G025230	undescribed protein	1H	121280762	121281023	+	No	LC_u	-	-
QFD.73xC.1.1	HORVU1Hr1G025240	undescribed protein	1H	121296080	121296789	-	No	LC_u	-	-
QFD.73xC.1.1	HORVU1Hr1G025250	Leucine-rich repeat receptor-like protein kinase family protein	1H	121429860	121436599	-	No	HC_G	IPR032675,IPR001611,IPR003591,IPR013210	GO:0005515
QFD.73xC.1.1	HORVU1Hr1G025260	unknown function	1H	121460143	121460912	-	No	LC_TE	IPR000477	-
QFD.73xC.1.1	HORVU1Hr1G025270	undescribed protein	1H	121533896	121535105	-	No	LC_u	-	-
QFD.73xC.1.1	HORVU1Hr1G025280	Protein kinase superfamily protein	1H	121597291	121609076	+	No	HC_G	IPR008271,IPR011009,IPR013210,IPR013320,IPR017441,IPR032675,IPR000719,IPR001611,IPR002290	GO:0006468,GO:0004672,GO:0005515,GO:0005524
QFD.73xC.1.1	HORVU1Hr1G025290	undescribed protein	1H	121706298	121707321	+	No	LC_u	-	-
QFD.73xC.1.1	HORVU1Hr1G025300	undescribed protein	1H	121708349	121708921	+	No	HC_U	IPR021855	-
QFD.73xC.1.1	HORVU1Hr1G025310	Retrotransposon protein, putative, Ty3-gypsy subclass	1H	121788582	121790279	-	No	LC_TE	IPR001584,IPR012337,IPR023780	GO:0003676,GO:0015074
QFD.73xC.1.1	HORVU1Hr1G025320	Retrotransposon protein, putative, Ty3-gypsy subclass	1H	121825657	121834218	+	No	LC_TE	IPR013242,IPR000477,IPR001584,IPR012337	GO:0003676,GO:0015074
QFD.73xC.1.1	HORVU1Hr1G025330	undescribed protein	1H	121969018	121969400	-	No	LC_u	-	-
QFD.73xC.1.1	HORVU1Hr1G025340	Protein ApaG	1H	121994096	121997684	-	No	HC_G	-	-
QFD.73xC.1.1	HORVU1Hr1G025350	Zinc finger BED domain-containing protein RICESLEEPER 2	1H	122081964	122083786	+	No	LC_TE	IPR008906,IPR012337	GO:0003676,GO:0046983
QFD.73xC.1.1	HORVU1Hr1G025360	mRNA cap guanine-N7 methyltransferase 1	1H	122695030	122698867	-	No	HC_G	IPR004971,IPR029063	-
QFD.73xC.1.1	HORVU1Hr1G025370	phospholipase D P2	1H	123287176	123303111	+	No	HC_G	IPR001736,IPR024632	GO:0003824
QFD.73xC.1.1	HORVU1Hr1G025380	unknown function	1H	123293348	123295579	-	No	HC_G	IPR029466	-
QFD.73xC.1.1	HORVU1Hr1G025390	Phosphoenolpyruvate/phosphate translocator 3, chloroplastic	1H	123301589	123308893	-	No	HC_G	IPR004696,IPR004853	GO:0005215,GO:0006810,GO:0016021
QFD.73xC.1.1	HORVU1Hr1G025400	undescribed protein	1H	123370879	123432778	-	No	LC_u	-	-
QFD.73xC.1.1	HORVU1Hr1G025410	undescribed protein	1H	123429169	123432719	+	No	LC_u	-	-
QFD.73xC.1.1	HORVU1Hr1G025420	undescribed protein	1H	123661625	123662343	+	No	LC_u	-	-
QFD.73xC.1.1	HORVU1Hr1G025430	undescribed protein	1H	123661998	123662980	-	No	LC_u	-	-
QFD.73xC.1.1	HORVU1Hr1G025440	Embryo-specific protein 3, (ATS3)	1H	123663572	123665116	-	No	HC_G	IPR001024,IPR010417	GO:0005515
QFD.73xC.1.1	HORVU1Hr1G025450	Multiple organellar RNA editing factor 5, mitochondrial	1H	123809683	123814460	-	No	HC_G	-	-
QFD.73xC.1.1	HORVU1Hr1G025460	undescribed protein	1H	123812089	123814413	+	No	LC_u	-	-
QFD.73xC.1.1	HORVU1Hr1G025470	Adenine nucleotide alpha hydrolases-like superfamily protein	1H	123824371	123825122	-	No	HC_G	IPR006016,IPR014729	GO:0006950
QFD.73xC.1.1	HORVU1Hr1G025480	Mitochondrial substrate carrier family protein	1H	123839352	123842978	+	No	HC_G	IPR002067,IPR018108,IPR023395	GO:0055085
QFD.73xC.1.1	HORVU1Hr1G025490	undescribed protein	1H	123843293	123843447	-	No	LC_u	-	-
QFD.73xC.1.1	HORVU1Hr1G025500	Alba DNA/RNA-binding protein	1H	123843639	123844947	-	No	HC_G	IPR002775,IPR014560	GO:0003676
QFD.73xC.1.1	HORVU1Hr1G025510	undescribed protein	1H	124677950	124678516	+	No	LC_u	-	-
QFD.73xC.1.1	HORVU1Hr1G025520	undescribed protein	1H	124687159	124690769	-	No	LC_u	-	-
QFD.73xC.1.1	HORVU1Hr1G025530	Lactoylglutathione lyase / glyoxalase I family protein	1H	124699475	124704486	-	No	HC_G	IPR029068	-
QFD.73xC.1.1	HORVU1Hr1G025540	unknown function	1H	124700038	124704316	+	No	LC_U	-	-
QFD.73xC.1.1	HORVU1Hr1G025550	undescribed protein	1H	124783149	124783351	-	No	LC_u	-	-
QFD.73xC.1.1	HORVU1Hr1G025560	Cystathionine beta-lyase, chloroplastic	1H	124891049	124892161	+	No	HC_G	-	-
QFD.73xC.1.1	HORVU1Hr1G025570	Lactoylglutathione lyase / glyoxalase I family protein	1H	124905707	124916152	-	No	HC_G	IPR025870,IPR029068	-
QFD.73xC.1.1	HORVU1Hr1G025580	Lactoylglutathione lyase / glyoxalase I family protein	1H	125063071	125064423	+	No	HC_G	IPR029068	-
QFD.73xC.1.1	HORVU1Hr1G025590	undescribed protein	1H	125442031	125442393	-	No	LC_u	-	-
QFD.73xC.1.1	HORVU1Hr1G025600	RING/U-box superfamily protein	1H	125856695	125861689	+	No	HC_G	IPR001841,IPR011016,IPR013083	GO:0005515,GO:0008270
QFD.73xC.1.1	HORVU1Hr1G025610	Transposon Ty1-H Gag-Pol polyprotein	1H	125867661	125868786	+	No	LC_TE	IPR001584,IPR012337,IPR025724	GO:0003676,GO:0015074
QFD.73xC.1.1	HORVU1Hr1G025620	undescribed protein	1H	125876095	125876298	+	No	LC_u	-	-
QFD.73xC.1.1	HORVU1Hr1G025630	undescribed protein	1H	125929634	125945243	+	No	LC_u	-	-
QFD.73xC.1.1	HORVU1Hr1G025640	undescribed protein	1H	125942632	125944211	-	No	LC_u	-	-
QFD.73xC.1.1	HORVU1Hr1G025650	undescribed protein	1H	126095344	126095990	+	No	LC_u	-	-
QFD.73xC.1.1	HORVU1Hr1G025660	Pre-mRNA splicing factor PRP38 family protein	1H	126245265	126249571	-	No	HC_G	IPR024767	-
QFD.73xC.1.1	HORVU1Hr1G025670	Auxin-responsive protein IAA15	1H	126419113	126422184	+	No	HC_G	IPR000270,IPR003311	GO:0005515,GO:0005634,GO:0006355
QFD.73xC.1.1	HORVU1Hr1G025680	undescribed protein	1H	126441642	126441763	-	No	LC_u	-	-
QFD.73xC.1.1	HORVU1Hr1G025690	Serine/threonine protein phosphatase 2A 57 kDa regulatory subunit B' iota isoform	1H	126940575	126946796	+	No	HC_G	IPR002554,IPR016024	GO:0008601,GO:0000159,GO:0005488,GO:0007165
QFD.73xC.1.1	HORVU1Hr1G025700	undescribed protein	1H	126946947	126947623	-	No	LC_u	-	-
QFD.73xC.1.1	HORVU1Hr1G025710	3-ketoacyl-CoA synthase 12	1H	126947721	126948429	-	No	HC_G	-	-
QFD.73xC.1.1	HORVU1Hr1G025720	Transposon protein, putative, CACTA, En/Spm sub-class	1H	126948616	126949521	-	No	LC_TE	-	-
QFD.73xC.1.1	HORVU1Hr1G025730	undescribed protein	1H	126949622	126950295	-	No	LC_u	-	-
QFD.73xC.1.1	HORVU1Hr1G025740	undescribed protein	1H	126952372	126953347	+	No	LC_u	-	-
QFD.73xC.1.1	HORVU1Hr1G025750	undescribed protein	1H	126954636	126958304	+	No	LC_u	-	-
QFD.73xC.1.1	HORVU1Hr1G025760	undescribed protein	1H	127309375	127309756	+	No	LC_u	-	-
QFD.73xC.1.1	HORVU1Hr1G025770	undescribed protein	1H	127374630	127496516	+	No	LC_u	-	-
QFD.73xC.1.1	HORVU1Hr1G025780	Retrotransposon protein, putative, unclassified	1H	127528601	127528927	-	No	LC_TE	-	-
QFD.73xC.1.1	HORVU1Hr1G025790	unknown function	1H	127534249	127542458	-	No	LC_TE	IPR001969,IPR021109	GO:0004190,GO:0006508
QFD.73xC.1.1	HORVU1Hr1G025800	undescribed protein	1H	127537001	127540293	+	No	LC_u	-	-
QFD.73xC.1.1	HORVU1Hr1G025810	SPA1-related 3	1H	127600884	127601707	+	No	HC_G	-	-
QFD.73xC.1.1	HORVU1Hr1G025820	unknown function	1H	127726056	127726880	-	No	LC_TE	IPR026960	-
QFD.73xC.1.1	HORVU1Hr1G025830	UDP-Glycosyltransferase superfamily protein	1H	127734266	127736212	-	No	HC_G	IPR002213	GO:0008152,GO:0016758
QFD.73xC.1.1	HORVU1Hr1G025840	undescribed protein	1H	127780744	127781009	+	No	HC_u	-	-
QFD.73xC.1.1	HORVU1Hr1G025850	mitogen-activated protein kinase kinase kinase 16	1H	127883596	127884214	-	No	HC_G	IPR000719,IPR011009	GO:0004672,GO:0005524,GO:0006468
QFD.73xC.1.1	HORVU1Hr1G025860	undescribed protein	1H	127932957	127933222	+	No	HC_u	-	-
QFD.73xC.1.1	HORVU1Hr1G025870	UDP-Glycosyltransferase superfamily protein	1H	128022845	128026963	-	No	HC_G	IPR002213	GO:0008152,GO:0016758
QFD.73xC.1.1	HORVU1Hr1G025880	undescribed protein	1H	128153523	128154250	-	No	LC_u	-	-
QFD.73xC.1.1	HORVU1Hr1G025890	Boron transporter 4	1H	128156559	128163806	-	No	HC_G	IPR011531	GO:0006820,GO:0016021
QFD.73xC.1.1	HORVU1Hr1G025900	undescribed protein	1H	128168498	128170111	+	No	LC_u	-	-
QFD.73xC.1.1	HORVU1Hr1G025910	pentatricopeptide repeat 336	1H	128168548	128176653	-	No	HC_G	IPR002885,IPR011990	GO:0005515
QFD.73xC.1.1	HORVU1Hr1G025920	Retrotransposon protein, putative, Ty1-copia subclass	1H	128397854	128398264	-	No	LC_TE	-	-
QFD.73xC.1.1	HORVU1Hr1G025930	unknown function	1H	128669829	128670032	+	No	LC_TE	IPR013103	-
QFD.73xC.1.1	HORVU1Hr1G025940	unknown protein	1H	128736526	128737325	-	No	HC_U
QFD.73xC.1.1	HORVU1Hr1G025950	undescribed protein	1H	128822168	128823374	+	No	LC_u	-	-
QFD.73xC.1.1	HORVU1Hr1G025960	Histone-lysine N-methyltransferase 2A	1H	129332365	129337272	+	No	HC_G	IPR003616,IPR007728,IPR015947,IPR025794,IPR001214,IPR003105,IPR003606	GO:0016571,GO:0018024,GO:0034968,GO:0042393,GO:0005515,GO:0005634,GO:0008270
QFD.73xC.1.1	HORVU1Hr1G025970	receptor-like kinase 902	1H	129628027	129629470	-	No	HC_G	IPR000719,IPR011009	GO:0004672,GO:0005524,GO:0006468
QFD.73xC.1.1	HORVU1Hr1G025980	undescribed protein	1H	129631731	129632402	+	No	LC_u	-	-
QFD.73xC.1.1	HORVU1Hr1G025990	undescribed protein	1H	129826556	129827466	-	No	LC_u	-	-
QFD.73xC.1.1	HORVU1Hr1G026000	undescribed protein	1H	130032096	130032333	+	No	LC_u	-	-
QFD.73xC.1.1	HORVU1Hr1G026010	undescribed protein	1H	130032480	130033517	-	No	LC_u	-	-
QFD.73xC.1.1	HORVU1Hr1G026020	histidine kinase 5	1H	130043908	130044182	-	No	HC_G	IPR003661	GO:0000155,GO:0007165
QFD.73xC.1.1	HORVU1Hr1G026030	undescribed protein	1H	130044049	130044389	+	No	LC_u	-	-
QFD.73xC.1.1	HORVU1Hr1G026040	DNA ligase-like protein	1H	130045073	130047026	-	No	HC_G	-	-
QFD.73xC.1.1	HORVU1Hr1G026050	undescribed protein	1H	130049200	130050717	+	No	LC_u	-	-
QFD.73xC.1.1	HORVU1Hr1G026060	Isopenicillin N epimerase	1H	130131382	130131940	-	No	HC_G	-	-
QFD.73xC.1.1	HORVU1Hr1G026070	-	1H	130256405	130256759	+	No	-	-	-
QFD.73xC.1.1	HORVU1Hr1G026080	undescribed protein	1H	130257628	130257880	+	No	LC_u	-	-
QFD.73xC.1.1	HORVU1Hr1G026090	undescribed protein	1H	130362981	130363138	+	No	LC_u	-	-
QFD.73xC.1.1	HORVU1Hr1G026100	unknown protein	1H	130372437	130372778	-	No	HC_U
QFD.73xC.1.1	HORVU1Hr1G026110	Chromosome 3B, genomic scaffold, cultivar Chinese Spring	1H	130489459	130490683	-	No	HC_G	IPR000270	GO:0005515
QFD.73xC.1.1	HORVU1Hr1G026120	Syn-copalyl diphosphate synthase	1H	130496832	130497223	-	No	LC_TE?	-	-
QFD.73xC.1.1	HORVU1Hr1G026130	Mitochondrial ATPase complex subunit ATP10	1H	130504096	130508358	-	No	HC_G	IPR007849	-
QFD.73xC.1.1	HORVU1Hr1G026140	unknown function	1H	130507078	130510613	+	No	HC_U	-	-
QFD.73xC.1.1	HORVU1Hr1G026150	Phospholipase A1-II 5	1H	130569997	130571132	-	No	HC_G	IPR029058	-
QFD.73xC.1.1	HORVU1Hr1G026160	-	1H	130636262	130636299	.	No	-	-	-
QFD.73xC.1.1	HORVU1Hr1G026170	-	1H	130660294	130660344	.	No	-	-	-
QFD.73xC.1.1	HORVU1Hr1G026180	Chromosome 3B, genomic scaffold, cultivar Chinese Spring	1H	130661097	130661597	-	No	HC_G	IPR000270	GO:0005515
QFD.73xC.1.1	HORVU1Hr1G026190	Sugar transporter SWEET	1H	130695925	130696316	+	No	LC_TE?	-	-
QFD.73xC.1.1	HORVU1Hr1G026200	Chromosome 3B, genomic scaffold, cultivar Chinese Spring	1H	130701412	130702823	+	No	LC_U	-	-
QFD.73xC.1.1	HORVU1Hr1G026210	undescribed protein	1H	130718548	130721428	-	No	LC_u	-	-
QFD.73xC.1.1	HORVU1Hr1G026220	undescribed protein	1H	130721294	130721615	+	No	LC_u	-	-
QFD.73xC.1.1	HORVU1Hr1G026230	undescribed protein	1H	130826537	130827182	-	No	LC_u	-	-
QFD.73xC.1.1	HORVU1Hr1G026240	Chromosome 3B, genomic scaffold, cultivar Chinese Spring	1H	130828697	130829546	+	No	HC_G	IPR000270	GO:0005515
QFD.73xC.1.1	HORVU1Hr1G026250	structural maintenance of chromosomes 5	1H	131205652	131206885	+	No	HC_G	-	-
QFD.73xC.1.1	HORVU1Hr1G026260	unknown function	1H	131255389	131256322	-	No	LC_TE	IPR026960	-
QFD.73xC.1.1	HORVU1Hr1G026270	Retrotransposon protein, putative, unclassified	1H	131257279	131258303	-	No	LC_TE	-	-
QFD.73xC.1.1	HORVU1Hr1G026280	Zinc finger CCCH domain-containing protein 34	1H	131439489	131442457	+	No	HC_TE?	IPR000571	GO:0046872
QFD.73xC.1.1	HORVU1Hr1G026290	unknown function	1H	131442705	131443648	+	No	LC_U	IPR031421	-
QFD.73xC.1.1	HORVU1Hr1G026300	undescribed protein	1H	131444090	131445491	+	No	LC_u	-	-
QFD.73xC.1.1	HORVU1Hr1G026310	unknown function	1H	131491196	131491484	+	No	LC_U	-	-
QFD.73xC.1.1	HORVU1Hr1G026320	cellulose synthase 1	1H	131743225	131748541	-	No	HC_G	IPR013083,IPR027934	-
QFD.73xC.1.1	HORVU1Hr1G026330	Cellulose synthase family protein	1H	131936801	131938102	+	No	HC_G	IPR005150	GO:0016020,GO:0016760,GO:0030244
QFD.73xC.1.1	HORVU1Hr1G026340	undescribed protein	1H	132031841	132032304	-	No	LC_u	-	-
QFD.73xC.1.1	HORVU1Hr1G026350	undescribed protein	1H	132099477	132099797	+	No	LC_u	-	-
QFD.73xC.1.1	HORVU1Hr1G026360	Retrotransposon protein, putative, unclassified	1H	132227114	132227396	-	No	LC_TE	-	-
QFD.73xC.1.1	HORVU1Hr1G026370	unknown function	1H	132228173	132229051	-	No	LC_TE	IPR000477	-
QFD.73xC.1.1	HORVU1Hr1G026380	Retrotransposon protein, putative, unclassified	1H	132229075	132230077	-	No	LC_TE	IPR005135	-
QFD.73xC.1.1	HORVU1Hr1G026390	undescribed protein	1H	132231034	132231920	-	No	LC_u	-	-
QFD.73xC.1.1	HORVU1Hr1G026400	tapetum determinant 1	1H	132233741	132236033	+	No	HC_G	-	-
QFD.73xC.1.1	HORVU1Hr1G026410	-	1H	132558475	132561303	+	No	-	-	-
QFD.73xC.1.1	HORVU1Hr1G026420	undescribed protein	1H	132616022	132616841	+	No	LC_u	-	-
QFD.73xC.1.1	HORVU1Hr1G026430	undescribed protein	1H	132633268	132635458	+	No	HC_u	-	-
QFD.73xC.1.1	HORVU1Hr1G026440	Retrotransposon protein, putative, Ty3-gypsy subclass	1H	132828798	132849241	-	No	LC_TE	IPR012337,IPR000477,IPR001584,IPR002156	GO:0003676,GO:0004523,GO:0015074
QFD.73xC.1.1	HORVU1Hr1G026450	Retrotransposon protein, putative, unclassified	1H	132828807	132836931	+	No	LC_TE	IPR007321	-
QFD.73xC.1.1	HORVU1Hr1G026460	undescribed protein	1H	132845820	132845998	+	No	LC_u	-	-
QFD.73xC.1.1	HORVU1Hr1G026470	undescribed protein	1H	132846302	132847148	+	No	LC_u	-	-
QFD.73xC.1.1	HORVU1Hr1G026480	UDP-Glycosyltransferase superfamily protein	1H	132849363	132851336	-	No	HC_G	IPR002213	GO:0008152,GO:0016758
QFD.73xC.1.1	HORVU1Hr1G026490	undescribed protein	1H	132900317	132900915	-	No	LC_u	-	-
QFD.73xC.1.1	HORVU1Hr1G026500	undescribed protein	1H	132933451	132934348	+	No	LC_u	-	-
QFD.73xC.1.1	HORVU1Hr1G026510	Acid phosphatase 1	1H	133114625	133115592	+	No	HC_G	IPR005519,IPR023214	GO:0003993
QFD.73xC.1.1	HORVU1Hr1G026520	HXXXD-type acyl-transferase family protein	1H	133886000	133888304	-	No	HC_G	IPR003480,IPR023213	GO:0016747
QFD.73xC.1.1	HORVU1Hr1G026530	ROTUNDIFOLIA like 12	1H	134148190	134148944	+	No	HC_G	IPR012552	-
QFD.73xC.1.1	HORVU1Hr1G026540	undescribed protein	1H	134454081	134454540	-	No	LC_u	-	-
QFD.73xC.1.1	HORVU1Hr1G026550	undescribed protein	1H	134872481	134872830	+	No	LC_TE	IPR005135	-
QFD.73xC.1.1	HORVU1Hr1G026560	Retrotransposon protein, putative, unclassified	1H	134873103	134873597	+	No	LC_TE	-	-
QFD.73xC.1.1	HORVU1Hr1G026570	Pimeloyl-[acyl-carrier protein] methyl ester esterase	1H	134877158	134878511	+	No	HC_G	IPR000073,IPR029058	-
QFD.73xC.1.1	HORVU1Hr1G026580	unknown function	1H	135072892	135077735	-	No	HC_G	IPR001611,IPR032675	GO:0005515
QFD.73xC.1.1	HORVU1Hr1G026590	unknown function	1H	135084173	135088860	-	No	HC_U	-	-
QFD.73xC.1.1	HORVU1Hr1G026600	undescribed protein	1H	135290393	135292136	+	No	LC_u	-	-
QFD.73xC.1.1	HORVU1Hr1G026610	undescribed protein	1H	135290557	135291963	-	No	LC_u	-	-
QFD.73xC.1.1	HORVU1Hr1G026620	ATP synthase subunit-like protein	1H	135748402	135750642	-	No	HC_TE?	IPR004252	-
QFD.73xC.1.1	HORVU1Hr1G026630	Serine/threonine-protein kinase SMG1	1H	135753557	135753940	-	No	HC_TE?	IPR026960	-
QFD.73xC.1.1	HORVU1Hr1G026640	undescribed protein	1H	136079746	136080022	+	No	LC_u	-	-
QFD.73xC.1.1	HORVU1Hr1G026650	Leucine-rich repeat receptor-like protein kinase family protein	1H	136143576	136146151	+	No	HC_G	IPR001611,IPR032675	GO:0005515
QFD.73xC.1.1	HORVU1Hr1G026660	unknown function	1H	136152480	136152931	-	No	LC_TE	IPR019557	-
QFD.73xC.1.1	HORVU1Hr1G026670	undescribed protein	1H	136388700	136388861	-	No	LC_u	-	-
QFD.73xC.1.1	HORVU1Hr1G026680	Protein kinase superfamily protein	1H	136393865	136395135	+	No	HC_G	IPR011009,IPR000719,IPR002290,IPR008271	GO:0004672,GO:0005524,GO:0006468
QFD.73xC.1.1	HORVU1Hr1G026690	unknown function	1H	136450762	136451178	+	No	LC_U	-	-
QFD.73xC.1.1	HORVU1Hr1G026700	unknown function	1H	136451661	136468214	+	No	LC_TE	IPR025312,IPR025452	-
QFD.73xC.1.1	HORVU1Hr1G026710	undescribed protein	1H	136454091	136454409	-	No	LC_u	-	-
QFD.73xC.1.1	HORVU1Hr1G026720	undescribed protein	1H	136454162	136454406	+	No	LC_u	-	-
QFD.73xC.1.1	HORVU1Hr1G026730	unknown function	1H	136482109	136483036	-	No	LC_TE	IPR004252	-
QFD.73xC.1.1	HORVU1Hr1G026740	Chromosome 3B, genomic scaffold, cultivar Chinese Spring	1H	136514916	136515251	+	No	HC_U	-	-
QFD.73xC.1.1	HORVU1Hr1G026750	MAR binding filament-like protein 1	1H	136530041	136535419	-	No	HC_G	-	-
QFD.73xC.1.1	HORVU1Hr1G026760	undescribed protein	1H	136747460	136748295	-	No	LC_u	-	-
QFD.73xC.1.1	HORVU1Hr1G026770	undescribed protein	1H	136784357	136784776	+	No	LC_u	-	-
QFD.73xC.1.1	HORVU1Hr1G026780	Protein of unknown function (DUF581)	1H	136785040	136787127	+	No	HC_TE?	IPR007650	-
QFD.73xC.1.1	HORVU1Hr1G026790	-	1H	137260342	137275746	-	No	-	-	-
QFD.73xC.1.1	HORVU1Hr1G026800	unknown function	1H	137738598	137739199	+	No	HC_U	-	-
QFD.73xC.1.1	HORVU1Hr1G026810	unknown function	1H	137816005	137836004	+	No	LC_U	-	-
QFD.73xC.1.1	HORVU1Hr1G026820	ascorbate peroxidase 3	1H	138106124	138106908	-	No	HC_G	IPR002016,IPR002207,IPR010255	GO:0055114,GO:0004601,GO:0006979,GO:0020037
QFD.73xC.1.1	HORVU1Hr1G026830	undescribed protein	1H	138106127	138106908	+	No	LC_u	-	-
QFD.73xC.1.1	HORVU1Hr1G026840	Heat shock 70 kDa protein 14	1H	138926998	138941215	+	No	HC_G	IPR013126,IPR029047,IPR029048	-
QFD.73xC.1.1	HORVU1Hr1G026850	NPKL4	1H	138932756	138937351	+	No	HC_G	-	-
QFD.73xC.1.1	HORVU1Hr1G026860	Senescence-associated protein	1H	139044178	139044509	-	No	HC_G	-	-
QFD.73xC.1.1	HORVU1Hr1G026870	Senescence-associated protein, putative	1H	139045230	139045621	-	No	HC_G	-	-
QFD.73xC.1.1	HORVU1Hr1G026880	S-adenosyl-L-methionine-dependent methyltransferases superfamily protein	1H	139055284	139055895	-	No	HC_G	-	-
QFD.73xC.1.1	HORVU1Hr1G026890	BnaAnng22160D protein	1H	139089335	139089586	-	No	LC_U	-	-
QFD.73xC.1.1	HORVU1Hr1G026900	Macaca fascicularis brain cDNA clone: QflA-19312, similar to human similar to rRNA intron-encoded homing endonuclease(LOC391446), mRNA, RefSeq: XM_372959.1	1H	139089912	139090729	-	No	HC_G	-	-
QFD.73xC.1.1	HORVU1Hr1G026910	Unplaced genomic scaffold PLICRscaffold_102, whole genome shotgun sequence	1H	139091018	139091641	+	No	LC_U	-	-
QFD.73xC.1.1	HORVU1Hr1G026920	Senescence-associated protein	1H	139116573	139150928	-	No	HC_G	-	-
QFD.73xC.1.1	HORVU1Hr1G026930	Auxenochlorella protothecoides strain 0710 contig1325, whole genome shotgun sequence	1H	139116612	139117048	+	No	LC_U	-	-
QFD.73xC.1.1	HORVU1Hr1G026940	Senescence-associated protein, putative	1H	139117313	139142585	-	No	HC_G	-	-
QFD.73xC.1.1	HORVU1Hr1G026950	undescribed protein	1H	139122129	139123372	+	No	LC_u	-	-
QFD.73xC.1.1	HORVU1Hr1G026960	Protein TAR1	1H	139122758	139122994	-	No	HC_G	-	-
QFD.73xC.1.1	HORVU1Hr1G026970	Unplaced genomic scaffold PAXINscaffold_121, whole genome shotgun sequence	1H	139128336	139268448	+	No	LC_U	-	-
QFD.73xC.1.1	HORVU1Hr1G026980	Auxenochlorella protothecoides strain 0710 contig1325, whole genome shotgun sequence	1H	139129015	139265674	-	No	LC_U	-	-
QFD.73xC.1.1	HORVU1Hr1G026990	Senescence-associated protein, putative	1H	139135255	139144735	+	No	HC_G	-	-
QFD.73xC.1.1	HORVU1Hr1G027000	RRNA intron-encoded homing endonuclease	1H	139135272	139270538	-	No	HC_G	-	-
QFD.73xC.1.1	HORVU1Hr1G027010	Protein TAR1	1H	139138117	139138297	+	No	HC_G	-	-
QFD.73xC.1.1	HORVU1Hr1G027020	Senescence-associated protein, putative	1H	139138775	139138919	+	No	HC_G	-	-
QFD.73xC.1.1	HORVU1Hr1G027030	undescribed protein	1H	139140927	139141059	+	No	LC_u	-	-
QFD.73xC.1.1	HORVU1Hr1G027040	undescribed protein	1H	139144825	139145667	-	No	LC_u	-	-
QFD.73xC.1.1	HORVU1Hr1G027050	undescribed protein	1H	139147275	139147668	+	No	LC_u	-	-
QFD.73xC.1.1	HORVU1Hr1G027060	Unplaced genomic scaffold PLICRscaffold_102, whole genome shotgun sequence	1H	139148423	139149178	-	No	LC_U	-	-
QFD.73xC.1.1	HORVU1Hr1G027070	RRNA intron-encoded homing endonuclease	1H	139151036	139151341	+	No	HC_G	-	-
QFD.73xC.1.1	HORVU1Hr1G027080	RRNA intron-encoded homing endonuclease	1H	139151447	139151765	+	No	HC_G	-	-
QFD.73xC.1.1	HORVU1Hr1G027090	Senescence-associated protein	1H	139154628	139155170	+	No	HC_G	-	-
QFD.73xC.1.1	HORVU1Hr1G027100	undescribed protein	1H	139154696	139154968	-	No	LC_u	-	-
QFD.73xC.1.1	HORVU1Hr1G027110	undescribed protein	1H	139155270	139155415	-	No	LC_u	-	-
QFD.73xC.1.1	HORVU1Hr1G027120	Senescence-associated protein	1H	139155484	139155814	+	No	HC_G	-	-
QFD.73xC.1.1	HORVU1Hr1G027130	undescribed protein	1H	139155961	139156270	-	No	LC_u	-	-
QFD.73xC.1.1	HORVU1Hr1G027140	Conserved protein	1H	139174418	139174532	-	No	HC_G	-	-
QFD.73xC.1.1	HORVU1Hr1G027150	undescribed protein	1H	139177946	139178336	-	No	LC_u	-	-
QFD.73xC.1.1	HORVU1Hr1G027160	undescribed protein	1H	139178790	139178930	+	No	LC_u	-	-
QFD.73xC.1.1	HORVU1Hr1G027170	Senescence-associated protein, putative	1H	139192072	139193272	+	No	HC_G	-	-
QFD.73xC.1.1	HORVU1Hr1G027180	Senescence-associated protein, putative	1H	139193091	139193190	+	No	HC_G	-	-
QFD.73xC.1.1	HORVU1Hr1G027190	RRNA intron-encoded homing endonuclease	1H	139193387	139193485	-	No	HC_G	-	-
QFD.73xC.1.1	HORVU1Hr1G027200	Auxenochlorella protothecoides strain 0710 contig1325, whole genome shotgun sequence	1H	139193747	139194011	-	No	LC_U	-	-
QFD.73xC.1.1	HORVU1Hr1G027210	undescribed protein	1H	139194483	139194668	-	No	LC_u	-	-
QFD.73xC.1.1	HORVU1Hr1G027220	Senescence-associated protein, putative	1H	139216248	139216626	+	No	HC_G	-	-
QFD.73xC.1.1	HORVU1Hr1G027230	Senescence-associated protein	1H	139217578	139217677	+	No	HC_G	-	-
QFD.73xC.1.1	HORVU1Hr1G027240	-	1H	139218120	139218231	.	No	-	-	-
QFD.73xC.1.1	HORVU1Hr1G027250	RRNA intron-encoded homing endonuclease	1H	139239600	139239767	+	No	HC_G	-	-
QFD.73xC.1.1	HORVU1Hr1G027260	Unplaced genomic scaffold GYMLUscaffold_233, whole genome shotgun sequence	1H	139240744	139240907	-	No	LC_U	-	-
QFD.73xC.1.1	HORVU1Hr1G027270	undescribed protein	1H	139241040	139241403	-	No	LC_u	-	-
QFD.73xC.1.1	HORVU1Hr1G027280	Senescence-associated protein	1H	139242017	139242146	-	No	HC_G	-	-
QFD.73xC.1.1	HORVU1Hr1G027290	undescribed protein	1H	139249518	139249634	-	No	LC_u	-	-
QFD.73xC.1.1	HORVU1Hr1G027300	Senescence-associated protein, putative	1H	139264983	139297911	+	No	HC_G	-	-
QFD.73xC.1.1	HORVU1Hr1G027310	Macaca fascicularis brain cDNA clone: QflA-19312, similar to human similar to rRNA intron-encoded homing endonuclease(LOC391446), mRNA, RefSeq: XM_372959.1	1H	139270658	139270859	-	No	HC_G	-	-
QFD.73xC.1.1	HORVU1Hr1G027320	-	1H	139271536	139271639	.	No	-	-	-
QFD.73xC.1.1	HORVU1Hr1G027330	Auxenochlorella protothecoides strain 0710 contig1325, whole genome shotgun sequence	1H	139298036	139298388	-	No	LC_U	-	-
QFD.73xC.1.1	HORVU1Hr1G027340	Senescence-associated protein	1H	139313573	139328119	+	No	HC_G	-	-
QFD.73xC.1.1	HORVU1Hr1G027350	RRNA intron-encoded homing endonuclease	1H	139315446	139316527	-	No	HC_G	-	-
QFD.73xC.1.1	HORVU1Hr1G027360	Senescence-associated protein, putative	1H	139325011	139325489	+	No	HC_G	-	-
QFD.73xC.1.1	HORVU1Hr1G027370	Auxenochlorella protothecoides strain 0710 contig1325, whole genome shotgun sequence	1H	139325632	139325835	-	No	LC_U	-	-
QFD.73xC.1.1	HORVU1Hr1G027380	undescribed protein	1H	139420275	139420785	+	No	LC_u	-	-
QFD.73xC.1.1	HORVU1Hr1G027390	undescribed protein	1H	139581295	139582488	+	No	LC_u	-	-
QFD.73xC.1.1	HORVU1Hr1G027400	Ribosomal protein L18ae family	1H	139689666	139692709	+	No	HC_G	-	-
QFD.73xC.1.1	HORVU1Hr1G027410	Cytochrome P450 superfamily protein	1H	139694725	139696293	-	No	HC_G	IPR001128,IPR002401,IPR017972	GO:0055114,GO:0005506,GO:0016705,GO:0020037
QFD.73xC.1.1	HORVU1Hr1G027420	Heat shock 70 kDa protein 15	1H	139725407	139733069	-	No	HC_G	IPR013126,IPR029047,IPR029048	-
QFD.73xC.1.1	HORVU1Hr1G027430	Retrotransposon protein, putative, Ty3-gypsy subclass	1H	139780919	139787968	-	No	LC_TE	IPR000477,IPR001584,IPR012337	GO:0003676,GO:0015074
QFD.73xC.1.1	HORVU1Hr1G027440	Flavin-containing monooxygenase	1H	139856340	139856579	+	No	HC_G	-	-
QFD.73xC.1.1	HORVU1Hr1G027450	undescribed protein	1H	139898791	139898991	+	No	LC_u	-	-
QFD.73xC.1.1	HORVU1Hr1G027460	Protein transport protein Sec61 subunit gamma	1H	140135274	140135773	+	No	HC_G	IPR001901,IPR008158,IPR023391	GO:0015450,GO:0016020,GO:0006605,GO:0006886,GO:0015031
QFD.73xC.1.1	HORVU1Hr1G027470	unknown function	1H	140141045	140142051	+	No	LC_TE	IPR026960	-
QFD.73xC.1.1	HORVU1Hr1G027480	undescribed protein	1H	140142493	140145498	+	No	LC_u	-	-
QFD.73xC.1.1	HORVU1Hr1G027490	Late embryogeneis abundant protein	1H	140145386	140147274	-	No	HC_G	-	-
QFD.73xC.1.1	HORVU1Hr1G027500	Cation/H(+) antiporter 2	1H	140214329	140217333	-	No	HC_G	IPR006153	GO:0055085,GO:0006812,GO:0015299,GO:0016021
QFD.73xC.1.1	HORVU1Hr1G027510	Long chain acyl-CoA synthetase 4	1H	140568762	140569095	+	No	HC_G	-	-
QFD.73xC.1.1	HORVU1Hr1G027520	agenet domain-containing protein	1H	140575820	140576828	+	No	HC_G	IPR008395,IPR014002	-
QFD.73xC.1.1	HORVU1Hr1G027530	-	1H	140577098	140577644	+	No	-	-	-
QFD.73xC.1.1	HORVU1Hr1G027540	undescribed protein	1H	140977022	140978353	+	No	HC_u	-	-
QFD.73xC.1.1	HORVU1Hr1G027550	Tetratricopeptide repeat (TPR)-like superfamily protein	1H	141090122	141092829	-	No	HC_G	IPR011990,IPR013026	GO:0005515
QFD.73xC.1.1	HORVU1Hr1G027560	undescribed protein	1H	141095891	141096130	+	No	LC_u	-	-
QFD.73xC.1.1	HORVU1Hr1G027570	Hypoxanthine phosphoribosyltransferase	1H	141096030	141099062	-	No	HC_G	IPR000836,IPR005904,IPR029057	GO:0009116,GO:0004422,GO:0005737,GO:0006166
QFD.73xC.1.1	HORVU1Hr1G027580	undescribed protein	1H	141096511	141097082	+	No	LC_u	-	-
QFD.73xC.1.1	HORVU1Hr1G027590	undescribed protein	1H	141199845	141200128	-	No	LC_u	-	-
QFD.73xC.1.1	HORVU1Hr1G027600	ubiquitin-conjugating enzyme 3	1H	141561006	141570796	-	No	HC_G	IPR000608,IPR016135,IPR023313	-
QFD.73xC.1.1	HORVU1Hr1G027610	unknown function	1H	141563028	141564029	+	No	LC_TE	IPR026960	-
QFD.73xC.1.1	HORVU1Hr1G027620	FACT complex subunit SSRP1-B	1H	142426894	142446852	+	No	HC_G	IPR013719,IPR024954,IPR000969,IPR009071,IPR011993	GO:0003677,GO:0005634
QFD.73xC.1.1	HORVU1Hr1G027630	undescribed protein	1H	142430109	142430534	-	No	LC_u	-	-
QFD.73xC.1.1	HORVU1Hr1G027640	undescribed protein	1H	142434280	142434780	+	No	LC_u	-	-
QFD.73xC.1.1	HORVU1Hr1G027650	unknown function	1H	142807904	142825949	+	No	LC_U	-	-
QFD.73xC.1.1	HORVU1Hr1G027660	Pentatricopeptide repeat-containing protein	1H	142831749	142921058	-	No	HC_G	IPR002885,IPR011990	GO:0005515
QFD.73xC.1.1	HORVU1Hr1G027670	undescribed protein	1H	143174131	143175097	-	No	LC_u	-	-
QFD.73xC.1.1	HORVU1Hr1G027680	undescribed protein	1H	143175337	143176090	-	No	LC_u	-	-
QFD.73xC.1.1	HORVU1Hr1G027690	Protein of unknown function (DUF1664)	1H	143351069	143358345	-	No	HC_U	IPR012458	-
QFD.73xC.1.1	HORVU1Hr1G027700	WRKY DNA-binding protein 50	1H	143405694	143407012	+	No	HC_G	IPR003657	GO:0003700,GO:0006355,GO:0043565
QFD.73xC.1.1	HORVU1Hr1G027710	undescribed protein	1H	143407081	143408076	+	No	LC_u	-	-
QFD.73xC.1.1	HORVU1Hr1G027720	undescribed protein	1H	143407937	143408676	-	No	LC_u	-	-
QFD.73xC.1.1	HORVU1Hr1G027730	unknown function	1H	143463036	143472664	+	No	LC_TE	IPR024752	-
QFD.73xC.1.1	HORVU1Hr1G027740	Retrovirus-related Pol polyprotein from transposon TNT 1-94	1H	143466865	143467245	+	No	LC_TE	-	-
QFD.73xC.1.1	HORVU1Hr1G027750	Retrotransposon protein, putative, Ty1-copia subclass	1H	143467831	143468046	+	No	LC_TE	-	-
QFD.73xC.1.1	HORVU1Hr1G027760	undescribed protein	1H	143470171	143470798	-	No	LC_u	-	-
QFD.73xC.1.1	HORVU1Hr1G027770	Protein kinase family protein	1H	143837029	143854668	-	No	HC_G	IPR008271,IPR011009,IPR017441,IPR017892,IPR000719,IPR000961,IPR002290	GO:0006468,GO:0004672,GO:0004674,GO:0005524
QFD.73xC.1.1	HORVU1Hr1G027780	unknown function	1H	143838565	143839039	-	No	LC_TE	IPR025724	-
QFD.73xC.1.1	HORVU1Hr1G027790	undescribed protein	1H	143843057	143843349	-	No	LC_u	-	-
QFD.73xC.1.1	HORVU1Hr1G027800	RNA-directed DNA polymerase (reverse transcriptase)-related family protein	1H	143843375	143844567	-	No	LC_TE	IPR026960	-
QFD.73xC.1.1	HORVU1Hr1G027810	Fatty acid oxidation complex subunit alpha	1H	144208108	144236671	-	No	HC_G	IPR001753,IPR018376,IPR029045	GO:0003824,GO:0008152
QFD.73xC.1.1	HORVU1Hr1G027820	undescribed protein	1H	144386131	144394749	-	No	LC_M	-	-
QFD.73xC.1.1	HORVU1Hr1G027830	unknown protein	1H	144462399	144470586	+	No	LC_TE
QFD.73xC.1.1	HORVU1Hr1G027840	Lactoylglutathione lyase / glyoxalase I family protein	1H	144464332	144470550	-	No	HC_G	IPR004360,IPR029068	-
QFD.73xC.1.1	HORVU1Hr1G027850	glycine-rich protein	1H	144826308	144853942	+	No	HC_G	-	-
QFD.73xC.1.1	HORVU1Hr1G027860	unknown function	1H	144846307	144846639	-	No	LC_TE	IPR005162	-
QFD.73xC.1.1	HORVU1Hr1G027870	unknown function	1H	144892908	144893410	-	No	LC_TE	IPR007321	-
QFD.73xC.1.1	HORVU1Hr1G027880	Coffea canephora DH200=94 genomic scaffold, scaffold_114	1H	145184055	145184993	-	No	LC_U	-	-
QFD.73xC.1.1	HORVU1Hr1G027890	unknown protein	1H	145185409	145186050	-	No	LC_TE
QFD.73xC.1.1	HORVU1Hr1G027900	undescribed protein	1H	145186287	145186712	-	No	LC_u	-	-
QFD.73xC.1.1	HORVU1Hr1G027910	unknown function	1H	145520661	145521374	-	No	HC_U	-	-
QFD.73xC.1.1	HORVU1Hr1G027920	Protein CHUP1, chloroplastic	1H	145560113	145565113	+	No	HC_G	-	-
QFD.73xC.1.1	HORVU1Hr1G027930	Actin binding family protein, putative isoform 1	1H	145600376	145603040	-	No	HC_G	-	-
QFD.73xC.1.1	HORVU1Hr1G027940	undescribed protein	1H	145601608	145603577	+	No	LC_u	-	-
QFD.73xC.1.1	HORVU1Hr1G027950	undescribed protein	1H	145669328	145669585	+	No	LC_u	-	-
QFD.73xC.1.1	HORVU1Hr1G027960	undescribed protein	1H	145909086	145909880	-	No	LC_u	-	-
QFD.73xC.1.1	HORVU1Hr1G027970	undescribed protein	1H	145909902	145910245	-	No	LC_u	-	-
QFD.73xC.1.1	HORVU1Hr1G027980	Histidine-containing phosphotransfer protein 4	1H	145914104	145928579	+	No	HC_G	IPR008207	GO:0000160,GO:0004871
QFD.73xC.1.1	HORVU1Hr1G027990	undescribed protein	1H	145919705	145926458	-	No	LC_u	-	-
QFD.73xC.1.1	HORVU1Hr1G028000	undescribed protein	1H	146075586	146078461	+	No	LC_u	-	-
QFD.73xC.1.1	HORVU1Hr1G028010	Chromosome 3B, genomic scaffold, cultivar Chinese Spring	1H	146783685	146783972	+	No	HC_G	IPR003340,IPR015300	GO:0003677
QFD.73xC.1.1	HORVU1Hr1G028020	undescribed protein	1H	147129957	147130739	+	No	LC_u	-	-
QFD.73xC.1.1	HORVU1Hr1G028030	NAD-dependent malic enzyme 1	1H	147239826	147280641	-	No	HC_G	IPR015884,IPR016040,IPR001891,IPR012301,IPR012302	GO:0051287,GO:0055114,GO:0004470,GO:0004471,GO:0006108
QFD.73xC.1.1	HORVU1Hr1G028040	undescribed protein	1H	147242710	147245351	+	No	LC_u	-	-
QFD.73xC.1.1	HORVU1Hr1G028050	undescribed protein	1H	147252700	147253395	-	No	LC_u	-	-
QFD.73xC.1.1	HORVU1Hr1G028060	undescribed protein	1H	147254506	147258098	-	No	LC_u	-	-
QFD.73xC.1.1	HORVU1Hr1G028070	undescribed protein	1H	147258306	147263314	-	No	LC_u	-	-
QFD.73xC.1.1	HORVU1Hr1G028080	undescribed protein	1H	147279871	147280510	+	No	LC_u	-	-
QFD.73xC.1.1	HORVU1Hr1G028090	Brefeldin A-inhibited guanine nucleotide-exchange protein 5	1H	147667489	147667728	-	No	HC_G	-	-
QFD.73xC.1.1	HORVU1Hr1G028100	undescribed protein	1H	148260147	148260946	+	No	LC_u	-	-
QFD.73xC.1.1	HORVU1Hr1G028110	undescribed protein	1H	148260147	148263325	-	No	LC_u	-	-
QFD.73xC.1.1	HORVU1Hr1G028120	Retrotransposon protein, putative, unclassified	1H	148263654	148281407	+	No	LC_TE	IPR005135	-
QFD.73xC.1.1	HORVU1Hr1G028130	Retrovirus-related Pol polyprotein from transposon TNT 1-94	1H	148265286	148265869	-	No	LC_TE	-	-
QFD.73xC.1.1	HORVU1Hr1G028140	undescribed protein	1H	148272661	148274401	-	No	LC_u	-	-
QFD.73xC.1.1	HORVU1Hr1G028150	Plant protein of unknown function (DUF827)	1H	148381850	148382078	+	No	HC_U	-	-
QFD.73xC.1.1	HORVU1Hr1G028160	-	1H	148630392	148630550	.	No	-	-	-
QFD.73xC.1.1	HORVU1Hr1G028170	Auxin-responsive protein IAA16	1H	148724184	148726408	+	No	HC_G	IPR000270,IPR003311	GO:0005515,GO:0005634,GO:0006355
QFD.73xC.1.1	HORVU1Hr1G028180	undescribed protein	1H	148725725	148726411	-	No	LC_u	-	-
QFD.73xC.1.1	HORVU1Hr1G028190	Proteasome subunit beta type-7-A	1H	149524661	149527456	+	No	HC_G	IPR023333,IPR029055,IPR000243,IPR001353,IPR016050	GO:0051603,GO:0004175,GO:0004298,GO:0005839
QFD.73xC.1.1	HORVU1Hr1G028200	hexokinase 2	1H	149579824	149583837	-	No	HC_G	IPR001312,IPR022672,IPR022673	GO:0005536,GO:0005975,GO:0016773,GO:0046835,GO:0001678,GO:0004396,GO:0005524
QFD.73xC.1.1	HORVU1Hr1G028210	Ergosterol biosynthetic protein 28	1H	149739921	149741060	-	No	HC_G	IPR005352	GO:0016021
QFD.73xC.1.1	HORVU1Hr1G028220	undescribed protein	1H	149964727	149965910	-	No	LC_u	-	-
QFD.73xC.1.1	HORVU1Hr1G028230	undescribed protein	1H	149964760	149965495	+	No	LC_u	-	-
QFD.73xC.1.1	HORVU1Hr1G028240	unknown function	1H	150369376	150369727	-	No	LC_TE	IPR007321	-
QFD.73xC.1.1	HORVU1Hr1G028250	IQ-domain 26	1H	151340636	151343662	-	No	HC_G	IPR000048,IPR025064	GO:0005515
QFD.73xC.1.1	HORVU1Hr1G028260	30S ribosomal protein S4, chloroplastic	1H	151720065	151720823	+	No	HC_G	IPR002942	GO:0003723
QFD.73xC.1.1	HORVU1Hr1G028270	Leucine-rich repeat receptor-like protein kinase family protein	1H	152194405	152197325	+	No	HC_G	IPR001611,IPR013210,IPR032675	GO:0005515
QFD.73xC.1.1	HORVU1Hr1G028280	DERLIN-1	1H	152295627	152301653	-	No	HC_G	-	-
QFD.73xC.1.1	HORVU1Hr1G028290	Retrotransposon protein, putative, unclassified	1H	152528319	152528906	+	No	LC_TE	IPR001584,IPR012337	GO:0003676,GO:0015074
QFD.73xC.1.1	HORVU1Hr1G028300	unknown function	1H	152529203	152529494	+	No	LC_TE	IPR016197,IPR023780	-
QFD.73xC.1.1	HORVU1Hr1G028310	unknown function	1H	152666455	152667014	+	No	LC_TE	IPR019557	-
QFD.73xC.1.1	HORVU1Hr1G028320	Retrotransposon protein, putative, unclassified	1H	152776687	152777387	-	No	LC_TE	IPR005135	-
QFD.73xC.1.1	HORVU1Hr1G028330	tRNA N6-adenosine threonylcarbamoyltransferase	1H	152996178	153011155	-	No	HC_G	IPR000905,IPR017860,IPR017861	-
QFD.73xC.1.1	HORVU1Hr1G028340	undescribed protein	1H	153543414	153543629	-	No	LC_u	-	-
QFD.73xC.1.1	HORVU1Hr1G028350	undescribed protein	1H	153557490	153558025	+	No	LC_u	-	-
QFD.73xC.1.1	HORVU1Hr1G028360	undescribed protein	1H	153559217	153559677	+	No	LC_u	-	-
QFD.73xC.1.1	HORVU1Hr1G028370	undescribed protein	1H	153697245	153697996	+	No	LC_u	-	-
QFD.73xC.1.1	HORVU1Hr1G028380	undescribed protein	1H	153741912	153742780	-	No	LC_u	-	-
QFD.73xC.1.1	HORVU1Hr1G028390	unknown function	1H	154481276	154482134	-	No	LC_U	-	-
QFD.73xC.1.1	HORVU1Hr1G028400	undescribed protein	1H	154509281	154511856	+	No	LC_u	-	-
QFD.73xC.1.1	HORVU1Hr1G028410	undescribed protein	1H	154511309	154513964	-	No	LC_u	-	-
QFD.73xC.1.1	HORVU1Hr1G028420	undescribed protein	1H	154534181	154534501	-	No	LC_u	-	-
QFD.73xC.1.1	HORVU1Hr1G028430	Plant protein of unknown function (DUF641)	1H	154859319	154861440	+	No	HC_U	-	-
QFD.73xC.1.1	HORVU1Hr1G028440	undescribed protein	1H	155068567	155069072	+	No	LC_u	-	-
QFD.73xC.1.1	HORVU1Hr1G028450	casein kinase 1	1H	155202239	155343076	-	No	HC_G	IPR011009,IPR000719,IPR002290,IPR008271	GO:0004672,GO:0005524,GO:0006468
QFD.73xC.1.1	HORVU1Hr1G028460	undescribed protein	1H	155336024	155337150	+	No	LC_u	-	-
QFD.73xC.1.1	HORVU1Hr1G028470	undescribed protein	1H	155337275	155338422	+	No	LC_u	-	-
QFD.73xC.1.1	HORVU1Hr1G028480	Retrotransposon protein, putative, unclassified	1H	155338541	155338919	-	No	LC_TE	-	-
QFD.73xC.1.1	HORVU1Hr1G028490	undescribed protein	1H	155338740	155339625	+	No	LC_u	-	-
QFD.73xC.1.1	HORVU1Hr1G028500	Peroxisomal acyl-coenzyme A oxidase 1	1H	155618189	155621764	+	No	HC_G	IPR002655,IPR009075	GO:0016627,GO:0055114,GO:0003997,GO:0005777,GO:0006635
QFD.73xC.1.1	HORVU1Hr1G028510	Peroxisomal acyl-coenzyme A oxidase 1	1H	155820982	155824650	-	No	HC_G	IPR002655,IPR009075	GO:0016627,GO:0055114,GO:0003997,GO:0005777,GO:0006635
QFD.73xC.1.1	HORVU1Hr1G028520	PRA1 (Prenylated rab acceptor) family protein	1H	155955416	155956363	+	No	HC_G	IPR004895	-
QFD.73xC.1.1	HORVU1Hr1G028530	LRR receptor-like serine/threonine-protein kinase EFR	1H	156167699	156167956	+	No	HC_G	-	-
QFD.73xC.1.1	HORVU1Hr1G028540	LRR receptor-like serine/threonine-protein kinase EFR	1H	156168310	156169005	+	No	HC_G	-	-
QFD.73xC.1.1	HORVU1Hr1G028550	Retrotransposon protein, putative, unclassified	1H	156169873	156170377	+	No	LC_TE	-	-
QFD.73xC.1.1	HORVU1Hr1G028560	Endoglucanase	1H	156228762	156230816	+	No	HC_G	IPR012445	-
[truncated: 43,304 more rows]
